# Supplementary material
Source: PubMed Central journal article supplement (PMC8896905)
Supplement: NIHMS1779635-supplement-supp_info.pdf [file NIHMS1779635-supplement-supp_info.pdf]

# Supporting Information

## Thermodynamics of Pillararene•Guest Complexation: Blinded Dataset for the SAMPL9 Challenge

*by Chunlin Deng, Ming Cheng, Peter Y. Zavalij, and Lyle Isaacs\**

Department of Chemistry and Biochemistry, University of Maryland,  
College Park, Maryland 20742, USA. E-mail: [LIsaacs@umd.edu](mailto:LIsaacs@umd.edu)

| <b>Table of Contents</b>                                                                 | <b>Pages</b> |
|------------------------------------------------------------------------------------------|--------------|
| General experimental                                                                     | S2           |
| Table of binding constants measured by ITC                                               | S2           |
| <sup>1</sup> H NMR spectra of <b>WP6</b> with guests                                     | S3 – S21     |
| Isothermal Titration Calorimetry measurements of <b>WP6</b> with Guests                  | S22 – S39    |
| X-ray crystal structure of <b>G2</b>                                                     | S40 – S44    |
| XYZ coordinates for the MMFF minimized geometries of <b>WP6•G5</b><br>and <b>WP6•G14</b> | S45 – S54    |
| pK <sub>a</sub> measurement of <b>WP6</b>                                                | S55 – S63    |

**General experimental.** Starting materials were purchased from commercial suppliers and used without further purification or were prepared by literature procedures. Melting points were measured on a Meltemp apparatus in open capillary tubes and are uncorrected. IR spectra were recorded on a JASCO FT/IR 4100 spectrometer and are reported in  $\text{cm}^{-1}$ . NMR spectra were measured on Bruker spectrometers operating at 400 or 600 MHz for  $^1\text{H}$  and 100 or 125 MHz for  $^{13}\text{C}$  using  $\text{D}_2\text{O}$ , or  $\text{DMSO-}d_6$  as solvents. Chemical shifts ( $\delta$ ) are referenced relative to the residual resonances for HOD (4.80 ppm) and  $\text{DMSO-}d_6$  (2.50 ppm for  $^1\text{H}$ , 39.51 ppm for  $^{13}\text{C}$ ). Mass spectrometry was performed using a JEOL AccuTOF electrospray instrument (ESI). ITC data was collected on a Malvern Microcal PEAQ-ITC instrument and analyzed using the software provided by the vendor.

**Table S1.** Binding constants ( $K_a$ ,  $\text{M}^{-1}$ ), thermodynamic parameter ( $\Delta H$ ,  $\text{kcal mol}^{-1}$ ) and  $C$  values for **WP6** and guests. Conditions:  $1\times$  PBS buffer, 298 K.

| Guest                              | $K_a$ with <b>WP6</b> ( $\text{M}^{-1}$ )<br>$\Delta H$ and $C$ or <i>app.</i> $C$ | Duplicate $K_a$ with <b>WP6</b> ( $\text{M}^{-1}$ )<br>$\Delta H$ and $C$ or <i>app.</i> $C$ |
|------------------------------------|------------------------------------------------------------------------------------|----------------------------------------------------------------------------------------------|
| <b>G1</b> <sup>a</sup>             | $(5.29 \pm 0.07) \times 10^4$ ; $-8.08 \pm 0.02$ ; 26                              | $(5.15 \pm 0.16) \times 10^4$ ; $-7.87 \pm 0.03$ ; 27.1                                      |
| <b>G2</b> <sup>b</sup>             | $(4.59 \pm 0.35) \times 10^7$ ; $-6.10 \pm 0.02$ ; 172                             | $(4.48 \pm 0.21) \times 10^7$ ; $-6.15 \pm 0.02$ ; 167                                       |
| ( $\pm$ )- <b>G3</b> <sup>a</sup>  | $(6.45 \pm 0.18) \times 10^5$ ; $-4.75 \pm 0.02$ ; 64.5                            | $(6.25 \pm 0.30) \times 10^5$ ; $-4.68 \pm 0.02$ ; 62.7                                      |
| <b>G4</b> <sup>e</sup>             | $(5.08 \pm 0.11) \times 10^4$ ; $-4.15 \pm 0.02$ ; 25.4                            | $(4.97 \pm 0.16) \times 10^4$ ; $-3.98 \pm 0.02$ ; 26.3                                      |
| <b>G5</b> <sup>f</sup>             | $(9.01 \pm 0.23) \times 10^3$ ; $-3.95 \pm 0.03$ ; 9                               | $(9.31 \pm 0.22) \times 10^3$ ; $-4.15 \pm 0.03$ ; 4.2                                       |
| <b>G6</b> <sup>c</sup>             | $(7.09 \pm 0.44) \times 10^5$ ; $-6.90 \pm 0.07$ ; 35.5                            | $(7.26 \pm 0.44) \times 10^5$ ; $-7.10 \pm 0.04$ ; 36.1                                      |
| <b>G7</b> <sup>d</sup>             | $(1.31 \pm 0.05) \times 10^5$ ; $-3.18 \pm 0.02$ ; 26.2                            | $(1.29 \pm 0.05) \times 10^5$ ; $-3.17 \pm 0.02$ ; 25.7                                      |
| <b>G8</b> <sup>e</sup>             | $(2.35 \pm 0.04) \times 10^4$ ; $-9.55 \pm 0.05$ ; 11.7                            | $(2.30 \pm 0.06) \times 10^4$ ; $-9.51 \pm 0.05$ ; 11.5                                      |
| <b>G9</b> <sup>f</sup>             | $(3.75 \pm 0.31) \times 10^4$ ; $-5.31 \pm 0.08$ ; 37.4                            | $(3.68 \pm 0.37) \times 10^4$ ; $-5.21 \pm 0.08$ ; 36.8                                      |
| <b>G10</b> <sup>b</sup>            | $(1.61 \pm 0.08) \times 10^7$ ; $-6.23 \pm 0.02$ ; 59.1                            | $(1.60 \pm 0.12) \times 10^7$ ; $-6.11 \pm 0.02$ ; 63                                        |
| <b>G11</b> <sup>f</sup>            | $(3.37 \pm 0.05) \times 10^4$ ; $-5.61 \pm 0.02$ ; 33.7                            | $(3.31 \pm 0.05) \times 10^4$ ; $-5.45 \pm 0.03$ ; 33.1                                      |
| ( $\pm$ )- <b>G12</b> <sup>g</sup> | $(9.43 \pm 0.31) \times 10^7$ ; $-7.45 \pm 0.02$ ; 142                             | $(8.40 \pm 0.51) \times 10^7$ ; $-7.41 \pm 0.02$ ; 309                                       |
| <b>G13</b> <sup>c</sup>            | $(1.63 \pm 0.11) \times 10^6$ ; $-4.98 \pm 0.04$ ; 81.3                            | $(1.61 \pm 0.11) \times 10^6$ ; $-4.96 \pm 0.03$ ; 82                                        |
| <b>G14</b> <sup>h</sup>            | $(4.69 \pm 0.09) \times 10^9$ ; $-16.4 \pm 0.02$ ; 59.2                            | $(4.67 \pm 0.11) \times 10^9$ ; $-16.1 \pm 0.03$ ; 500                                       |
| <b>G15</b> <sup>i</sup>            | $(1.76 \pm 0.06) \times 10^7$ ; $-7.03 \pm 0.03$ ; 15.4                            | $(1.45 \pm 0.07) \times 10^7$ ; $-7.13 \pm 0.02$ ; 135                                       |
| <b>G16</b> <sup>e</sup>            | $(1.32 \pm 0.03) \times 10^4$ ; $-7.49 \pm 0.06$ ; 6.6                             | $(1.24 \pm 0.03) \times 10^4$ ; $-7.00 \pm 0.06$ ; 6.27                                      |
| <b>G17</b> <sup>a</sup>            | $(2.29 \pm 0.06) \times 10^5$ ; $-4.15 \pm 0.02$ ; 22.5                            | $(3.45 \pm 0.27) \times 10^5$ ; $-3.52 \pm 0.05$ ; 34.5                                      |

<sup>a</sup> Measured directly by ITC during the titration of **WP6** (0.1 mM) in the cell with guest (1 mM) in the syringe. <sup>b</sup> Measured by the ITC competition by titrating a solution of **G7** (0.2 mM) and **WP6** (0.1 mM) in the cell with guest (1 mM) from the syringe. <sup>c</sup> Measured directly by the ITC during the titration of **WP6** (0.05 mM) in the cell with guest (0.5 mM) in the syringe. <sup>d</sup> Measured directly by the ITC during the titration of **WP6** (0.2 mM) in the cell with guest (2 mM) in the syringe. <sup>e</sup> Measured directly by the ITC during the titration of **WP6** (0.5 mM) in the cell with guest (5 mM) in the syringe. <sup>f</sup> Measured directly by the ITC during the titration of **WP6** (1 mM) in the cell with guest (10 mM) in the syringe. <sup>g</sup> Measured by the ITC competition by titrating a solution of **G7** (0.5 mM) and **WP6** (0.1 mM) in the cell with guest (1 mM) from the syringe. <sup>h</sup> Measured by the ITC competition by titrating a solution of **G15** (0.5 mM) and **WP6** (0.1 mM) in the cell with **G14** (1 mM) from the syringe. <sup>i</sup> Measured by the ITC competition by titrating a solution of **G7** (1.0 mM) and **WP6** (0.1 mM) in the cell with **G15** (1 mM) from the syringe.

**<sup>1</sup>H NMR spectra of WP6 with Guests.**

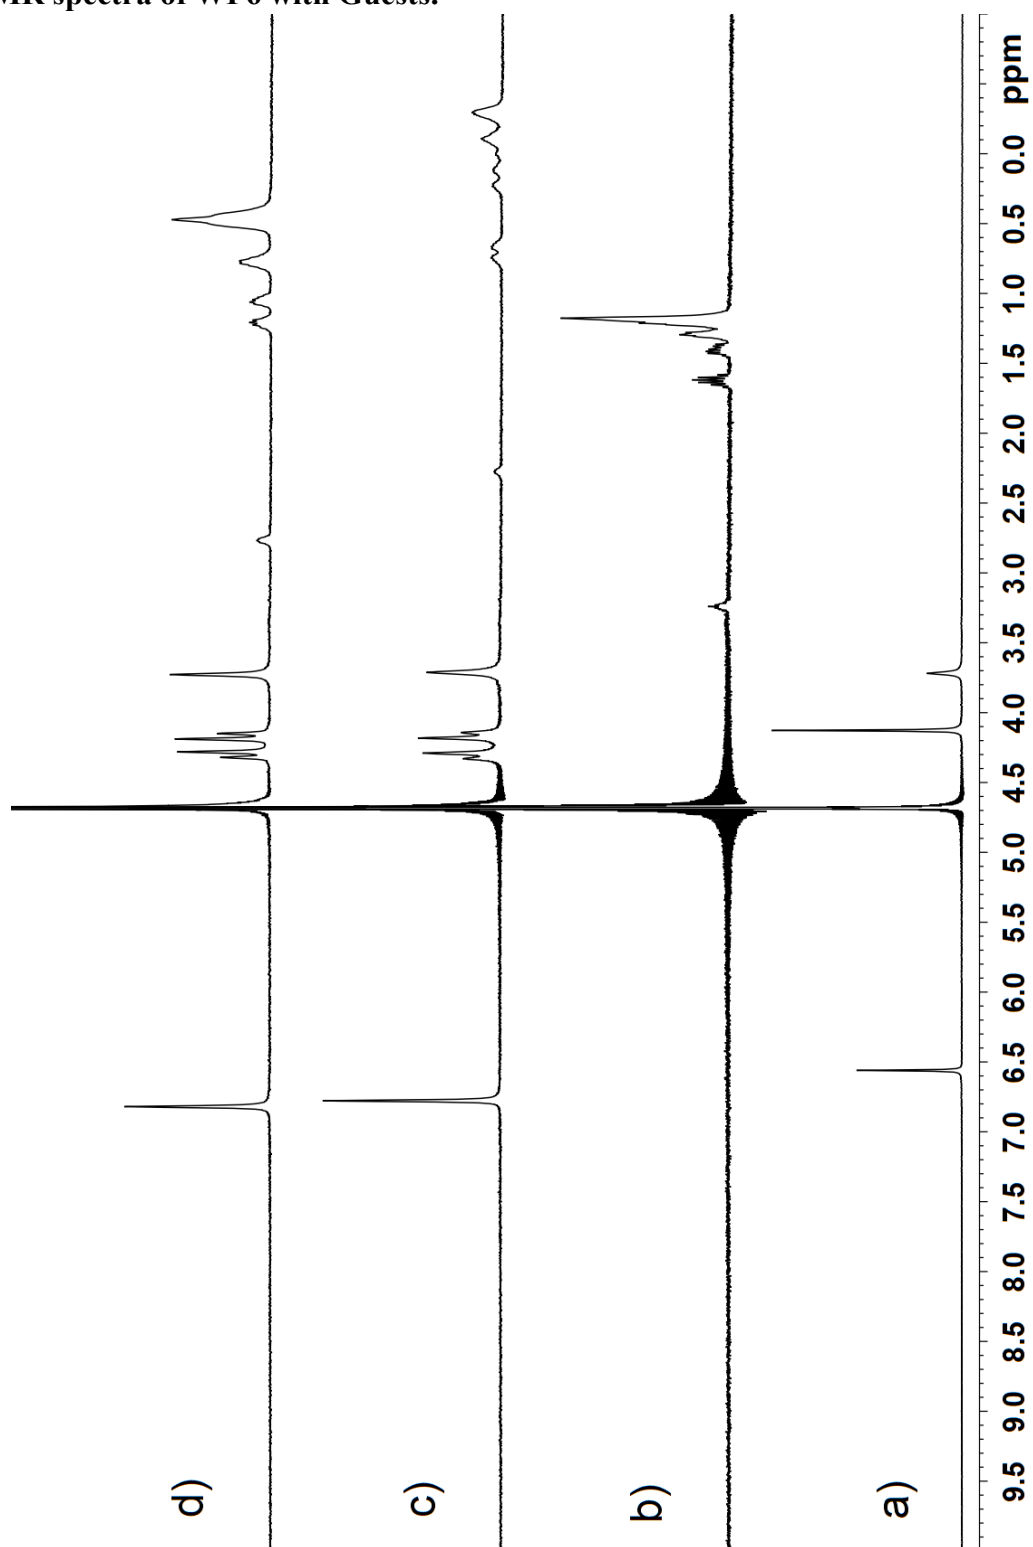

**Figure S1.** <sup>1</sup>H NMR spectra recorded (400 MHz, RT, D<sub>2</sub>O) for: a) WP6, b) Guest G1, c) an equimolar mixture of WP6 and Guest G1 (1 mM), and d) a 2:1 mixture of Guest G1 (2 mM) and WP6 (1 mM).

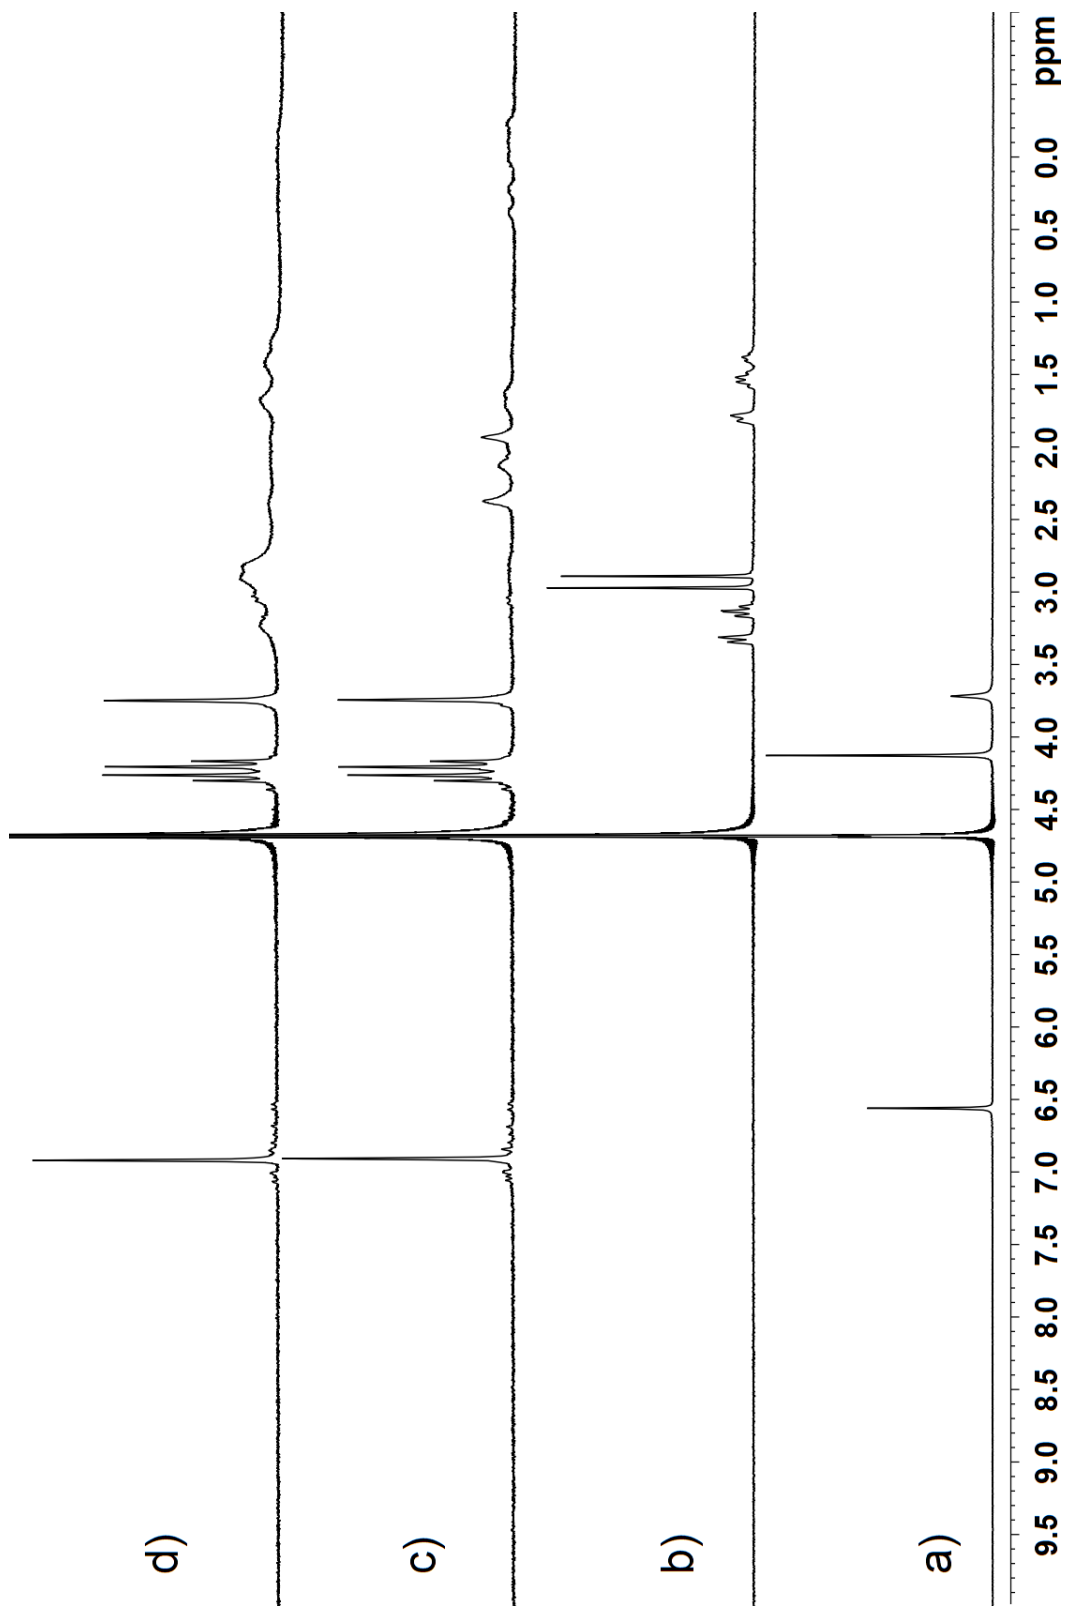

**Figure S2.** <sup>1</sup>H NMR spectra recorded (400 MHz, RT, D<sub>2</sub>O) for: a) **WP6**, b) Guest **G2**, c) an equimolar mixture of **WP6** and Guest **G2** (1 mM), and d) a 2:1 mixture of Guest **G2** (2 mM) and **WP6** (1 mM).

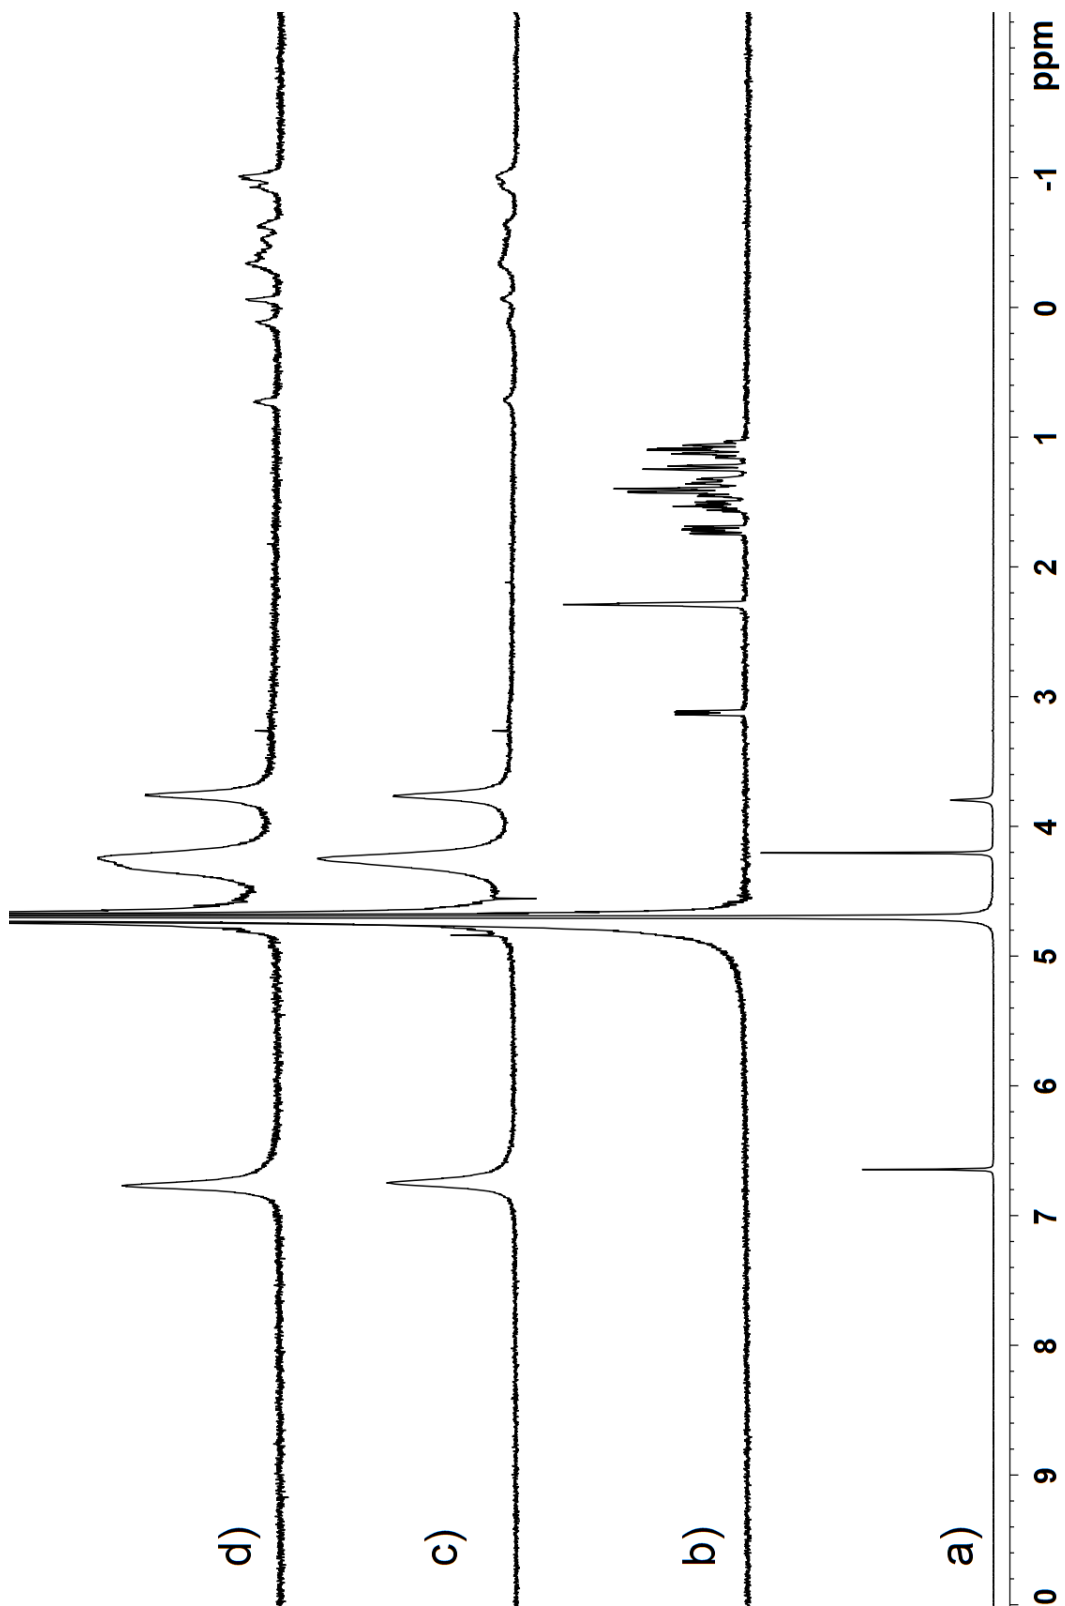

**Figure S3.**  $^1\text{H}$  NMR spectra recorded (400 MHz, RT,  $\text{D}_2\text{O}$ ) for: a) **WP6**, b) Guest **G3**, c) an equimolar mixture of **WP6** and Guest **G3** (1 mM), and d) a 2:1 mixture of Guest **G3** (2 mM) and **WP6** (1 mM).

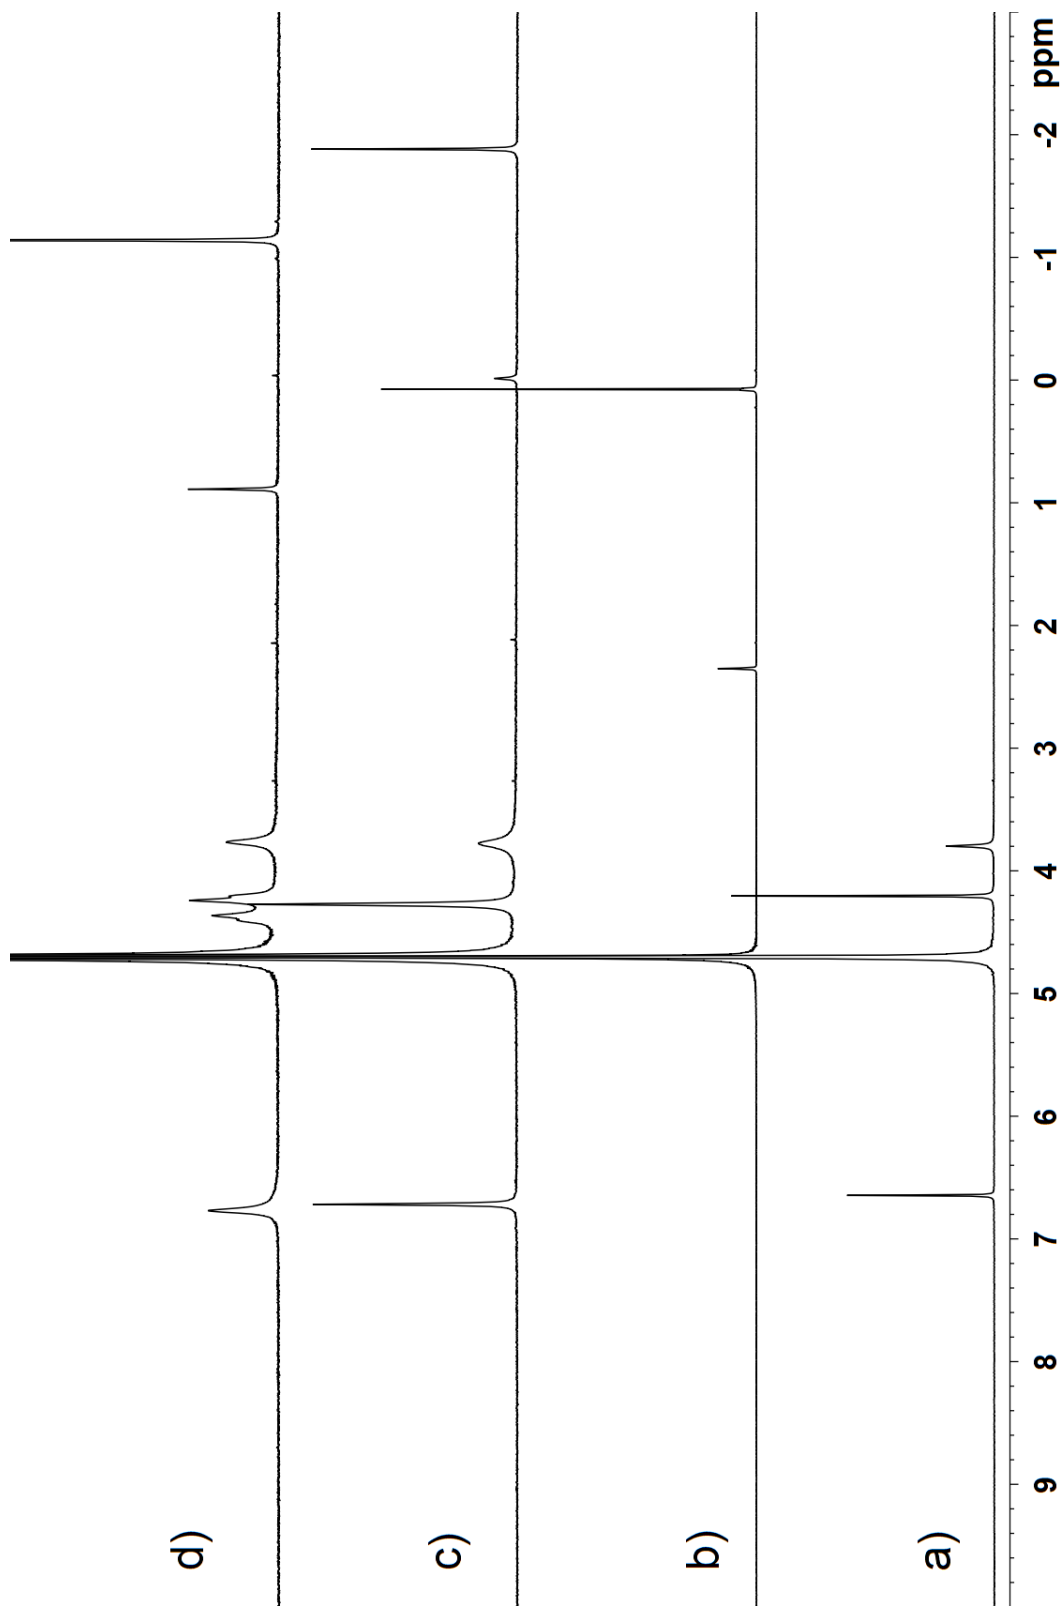

**Figure S4.** <sup>1</sup>H NMR spectra recorded (600 MHz, RT, D<sub>2</sub>O) for: a) **WP6**, b) Guest **G4**, c) an equimolar mixture of **WP6** and Guest **G4** (1 mM), and d) a 2:1 mixture of Guest **G4** (2 mM) and **WP6** (1 mM).

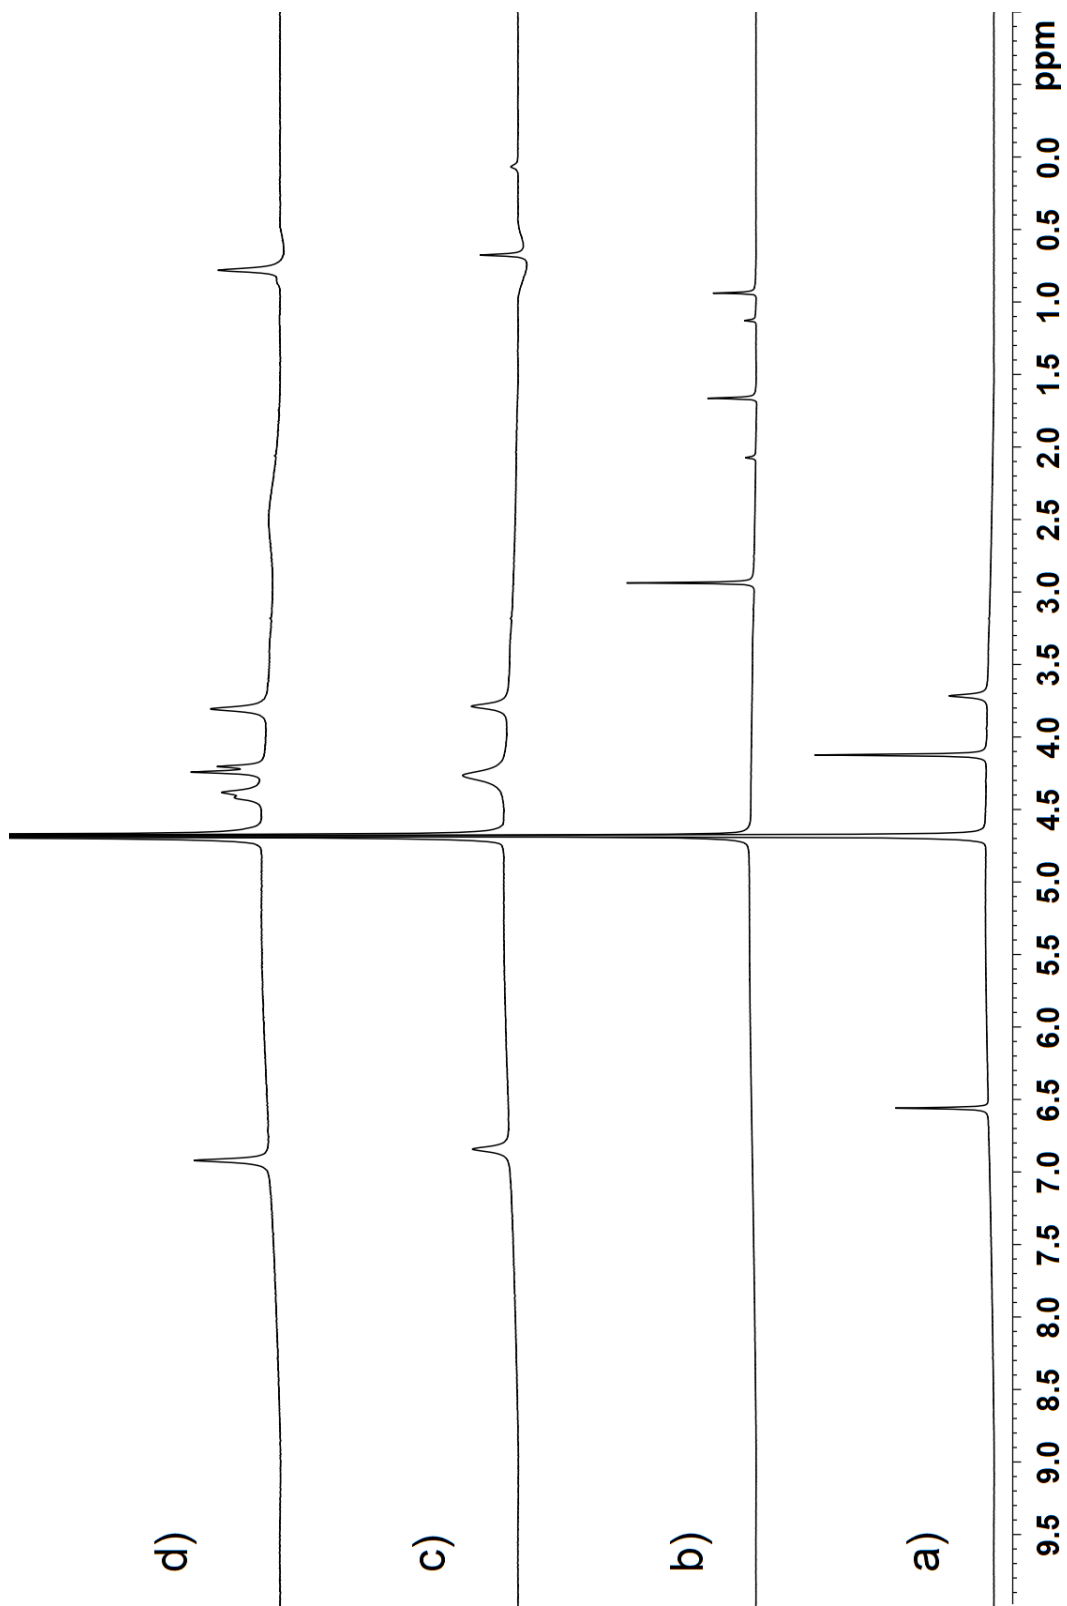

**Figure S5.** <sup>1</sup>H NMR spectra recorded (600 MHz, RT, D<sub>2</sub>O) for: a) **WP6**, b) Guest **G5**, c) an equimolar mixture of **WP6** and Guest **G5** (1 mM), and d) a 2:1 mixture of Guest **G5** (2 mM) and **WP6** (1 mM).

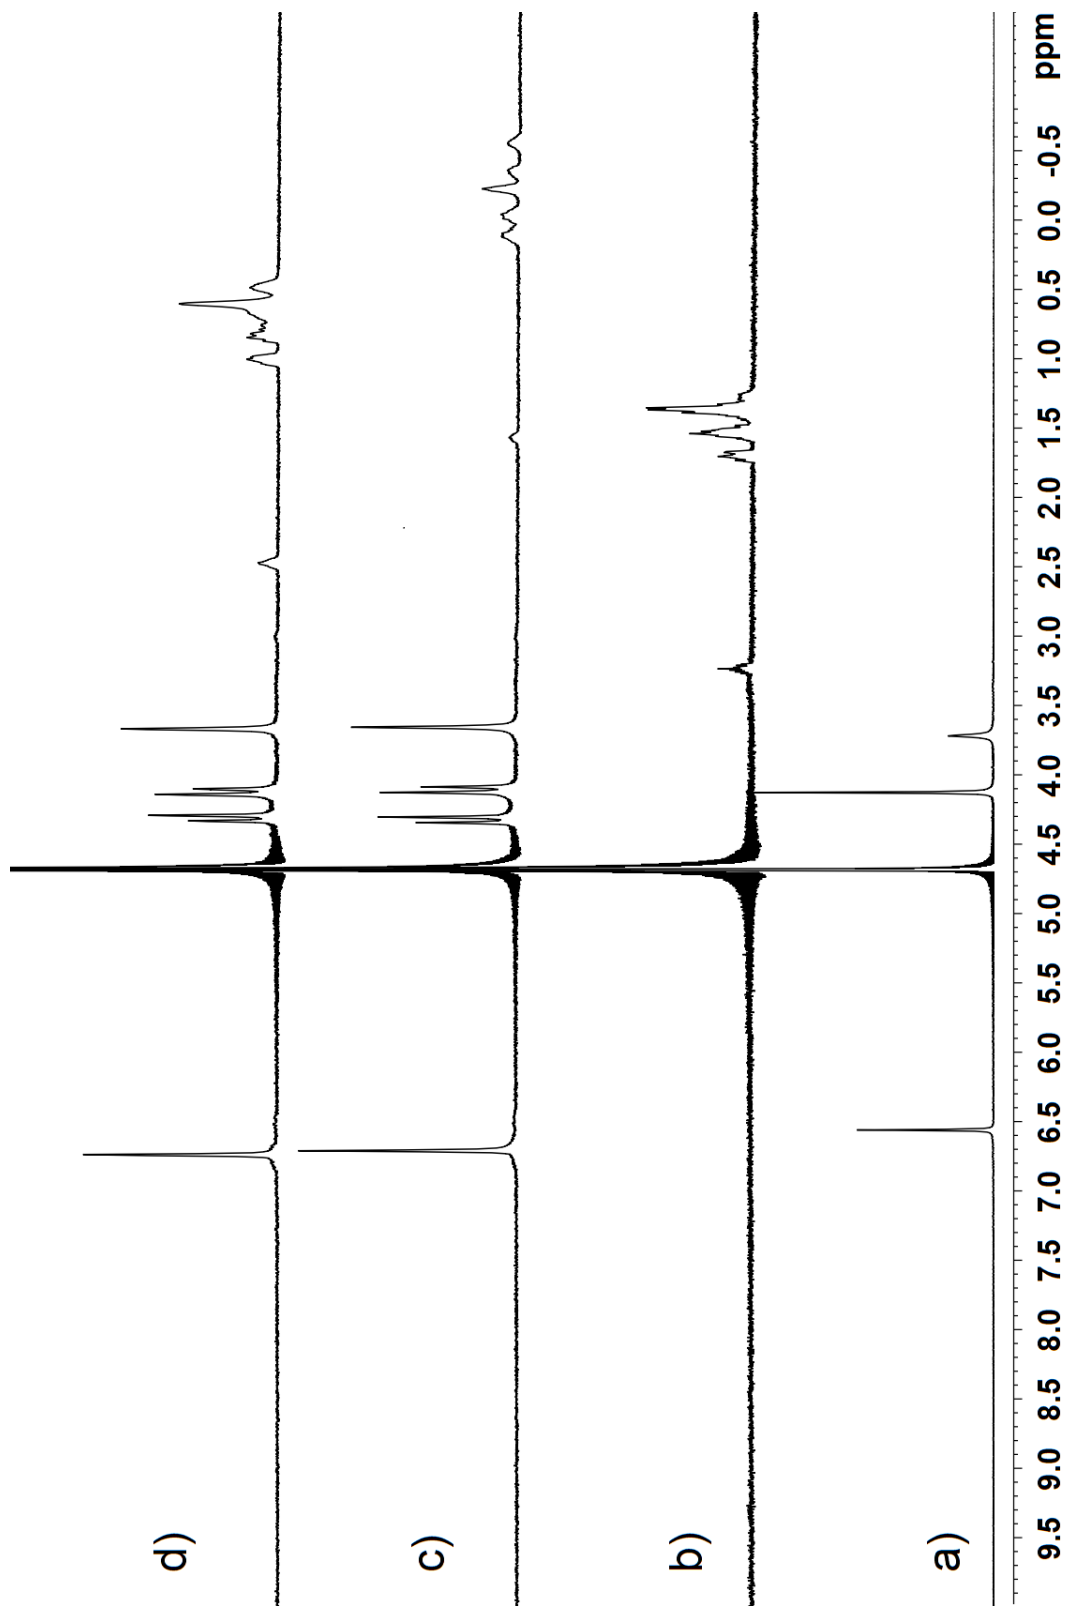

**Figure S6.** <sup>1</sup>H NMR spectra recorded (400 MHz, RT, D<sub>2</sub>O) for: a) WP6, b) Guest G6, c) an equimolar mixture of WP6 and Guest G6 (1 mM), and d) a 2:1 mixture of Guest G6 (2 mM) and WP6 (1 mM).



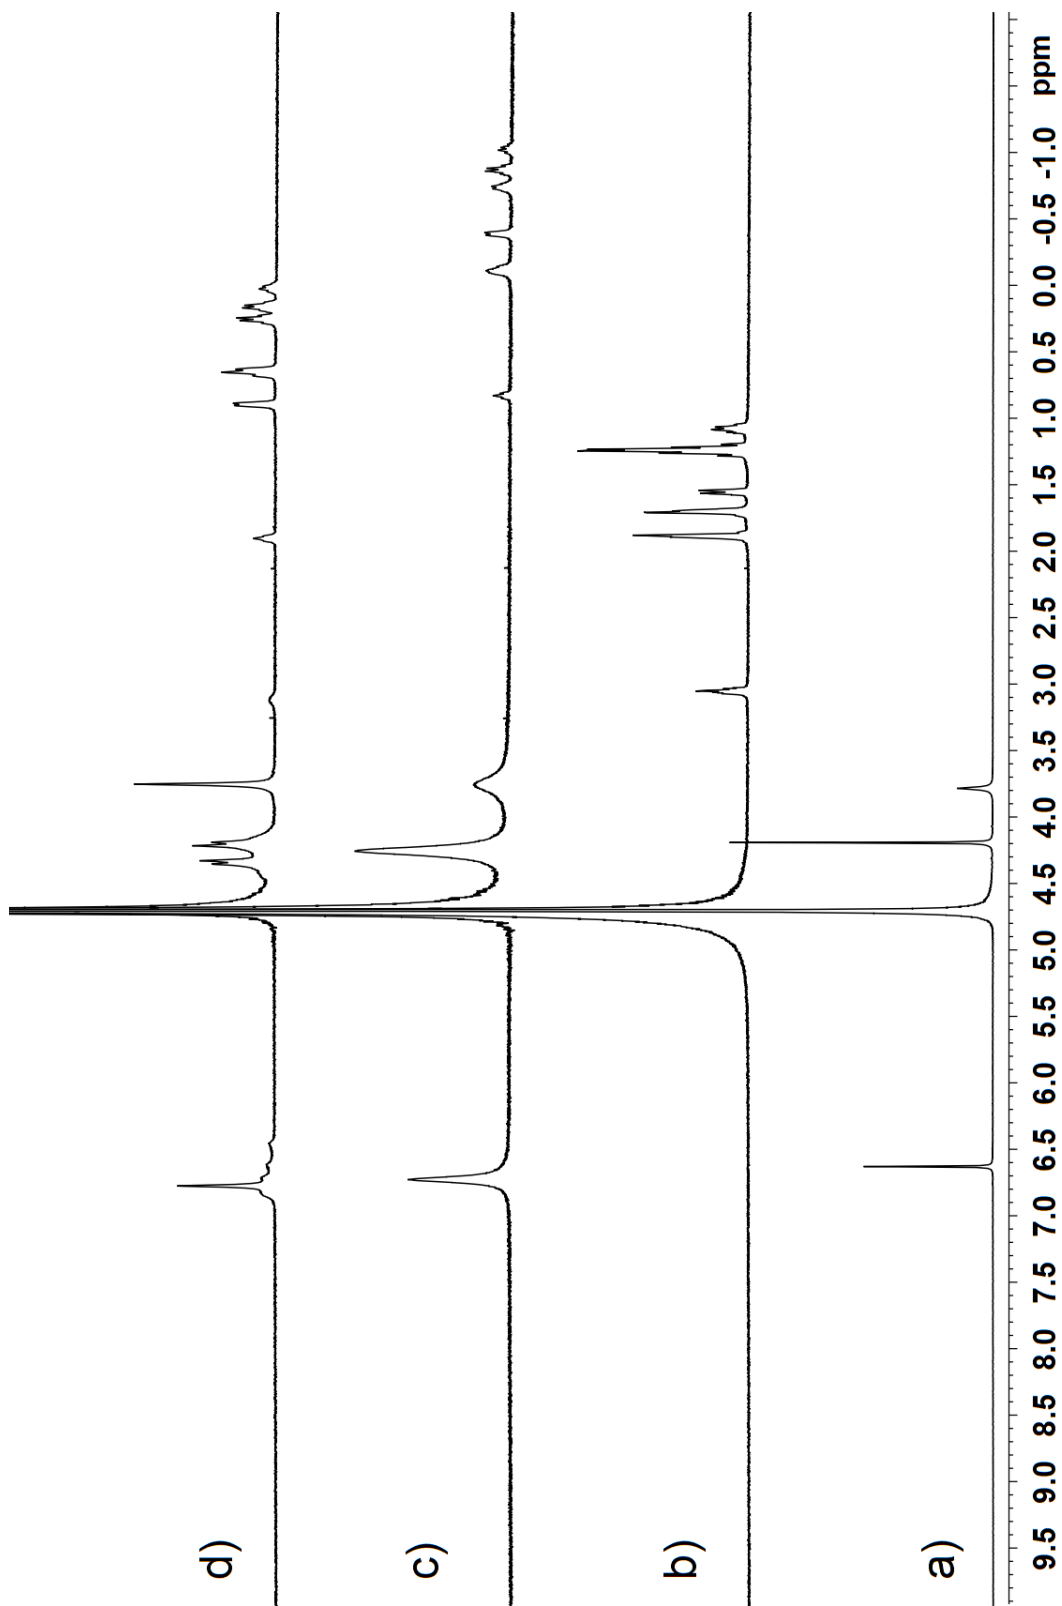

**Figure S7.** <sup>1</sup>H NMR spectra recorded (400 MHz, RT, D<sub>2</sub>O) for: a) **WP6**, b) Guest **G7**, c) an equimolar mixture of **WP6** and Guest **G7** (1 mM), and d) a 2:1 mixture of Guest **G7** (2 mM) and **WP6** (1 mM).

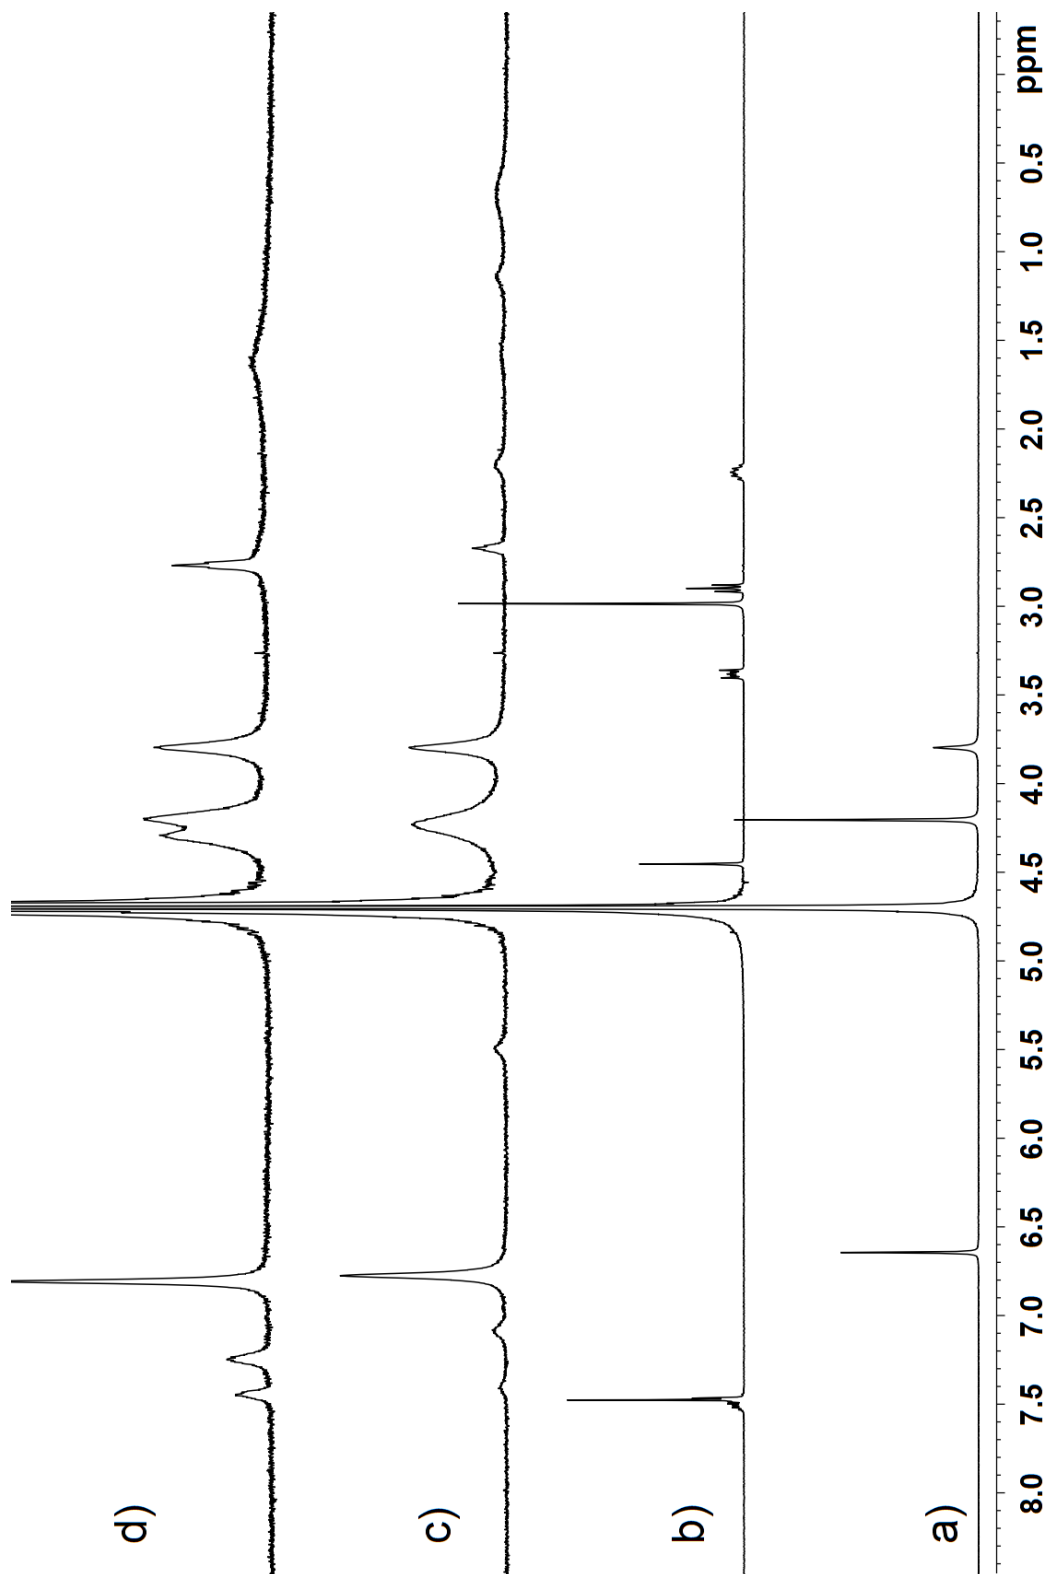

**Figure S8.** <sup>1</sup>H NMR spectra recorded (600 MHz, RT, D<sub>2</sub>O) for: a) **WP6**, b) Guest **G8**, c) an equimolar mixture of **WP6** and Guest **G8** (1 mM), and d) a 2:1 mixture of Guest **G8** (2 mM) and **WP6** (1 mM).

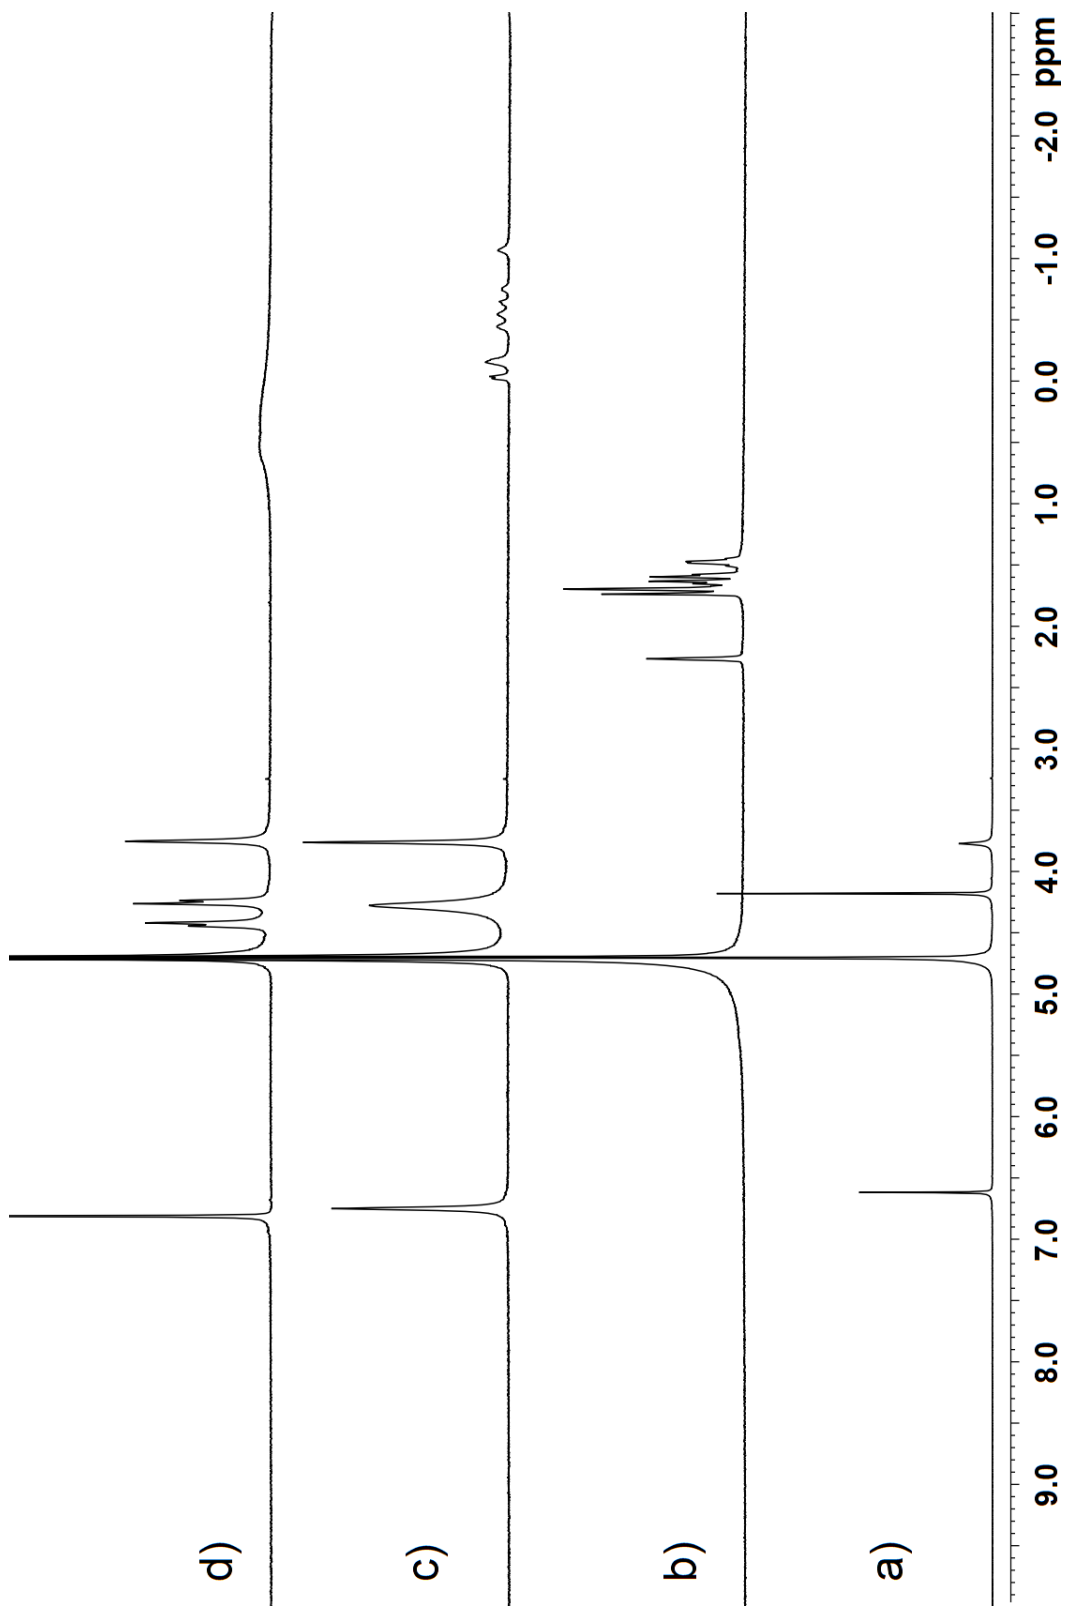

**Figure S9.**  $^1\text{H}$  NMR spectra recorded (600 MHz, RT,  $\text{D}_2\text{O}$ ) for: a) **WP6**, b) Guest **G9**, c) an equimolar mixture of **WP6** and Guest **G9** (1 mM), and d) a 2:1 mixture of Guest **G9** (2 mM) and **WP6** (1 mM).

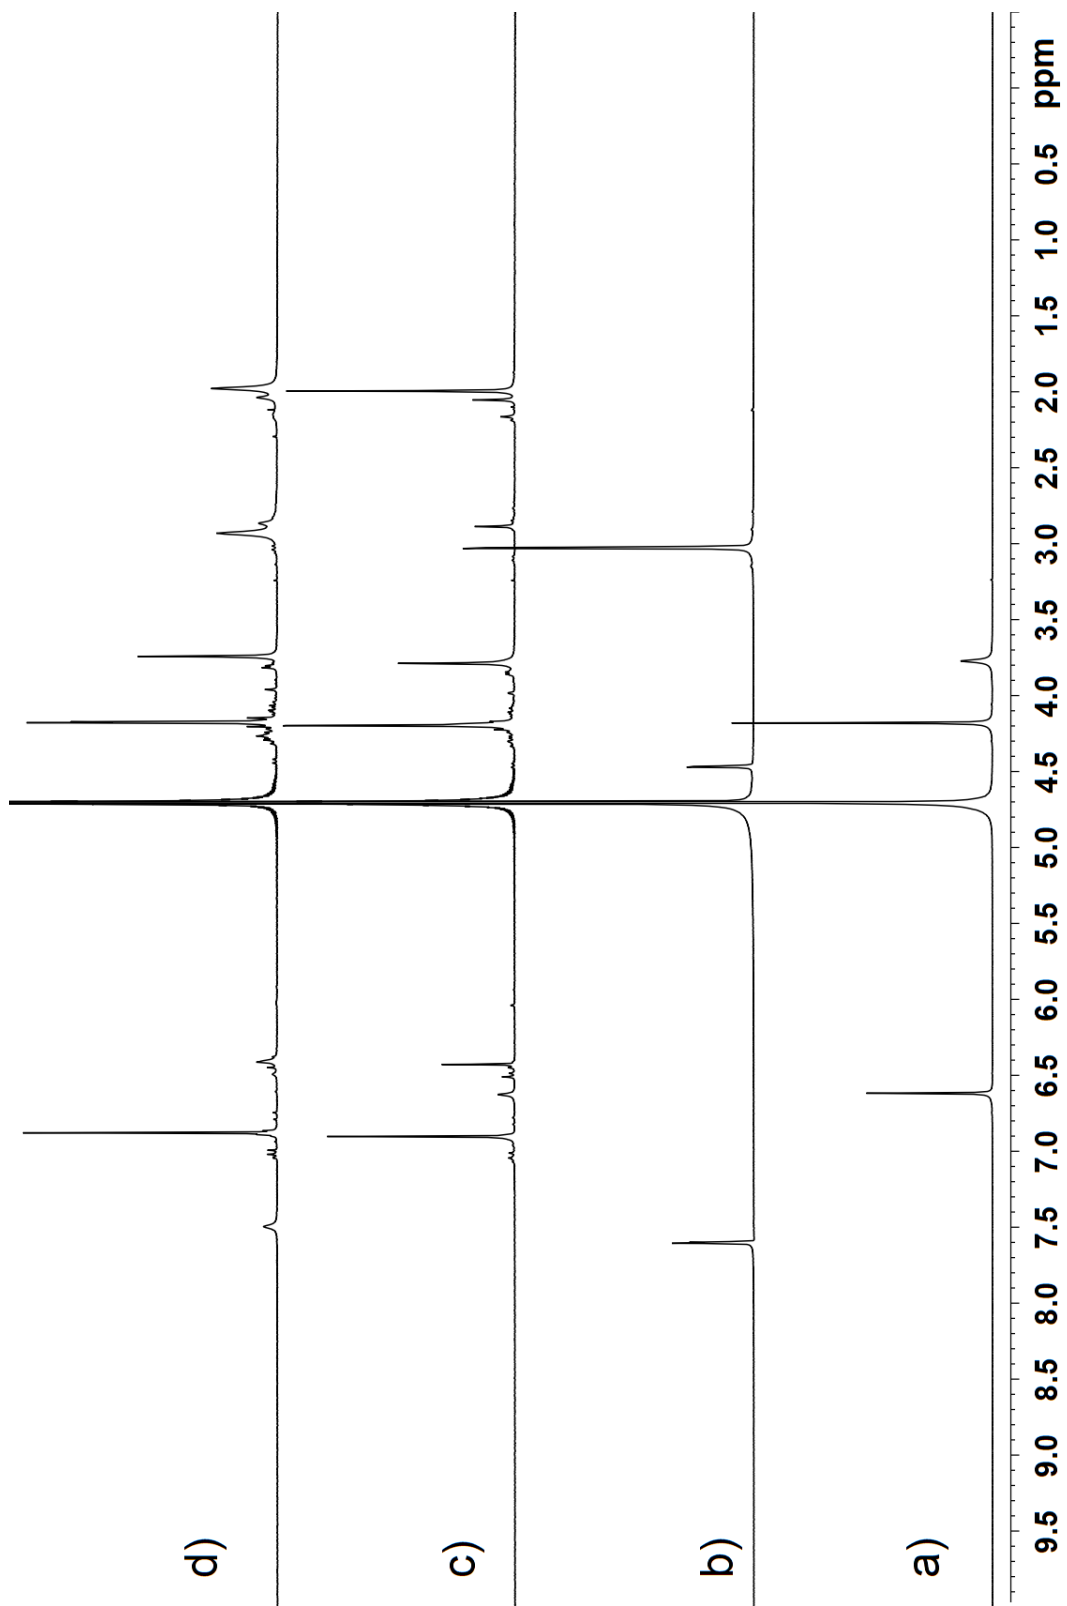

**Figure S10.** <sup>1</sup>H NMR spectra recorded (600 MHz, RT, D<sub>2</sub>O) for: a) **WP6**, b) Guest **G10**, c) an equimolar mixture of **WP6** and Guest **G10** (1 mM), and d) a 2:1 mixture of Guest **G10** (2 mM) and **WP6** (1 mM).

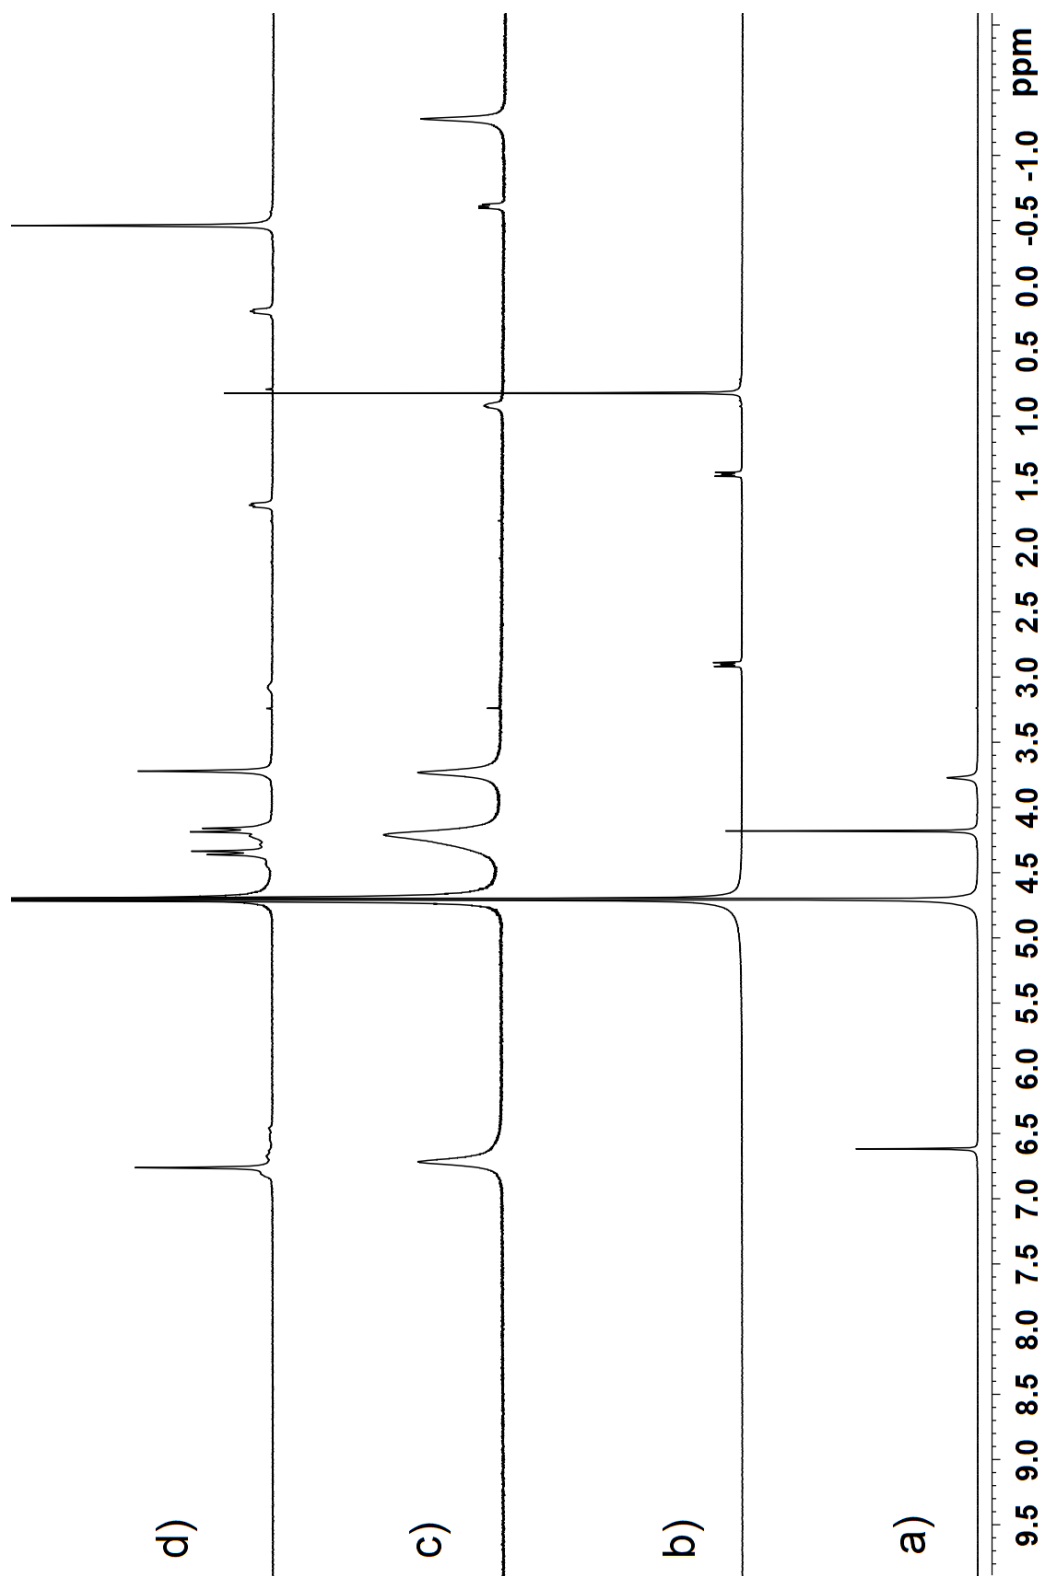

**Figure S11.** <sup>1</sup>H NMR spectra recorded (600 MHz, RT, D<sub>2</sub>O) for: a) **WP6**, b) Guest **G11**, c) an equimolar mixture of **WP6** and Guest **G11** (1 mM), and d) a 2:1 mixture of Guest **G11** (2 mM) and **WP6** (1 mM).

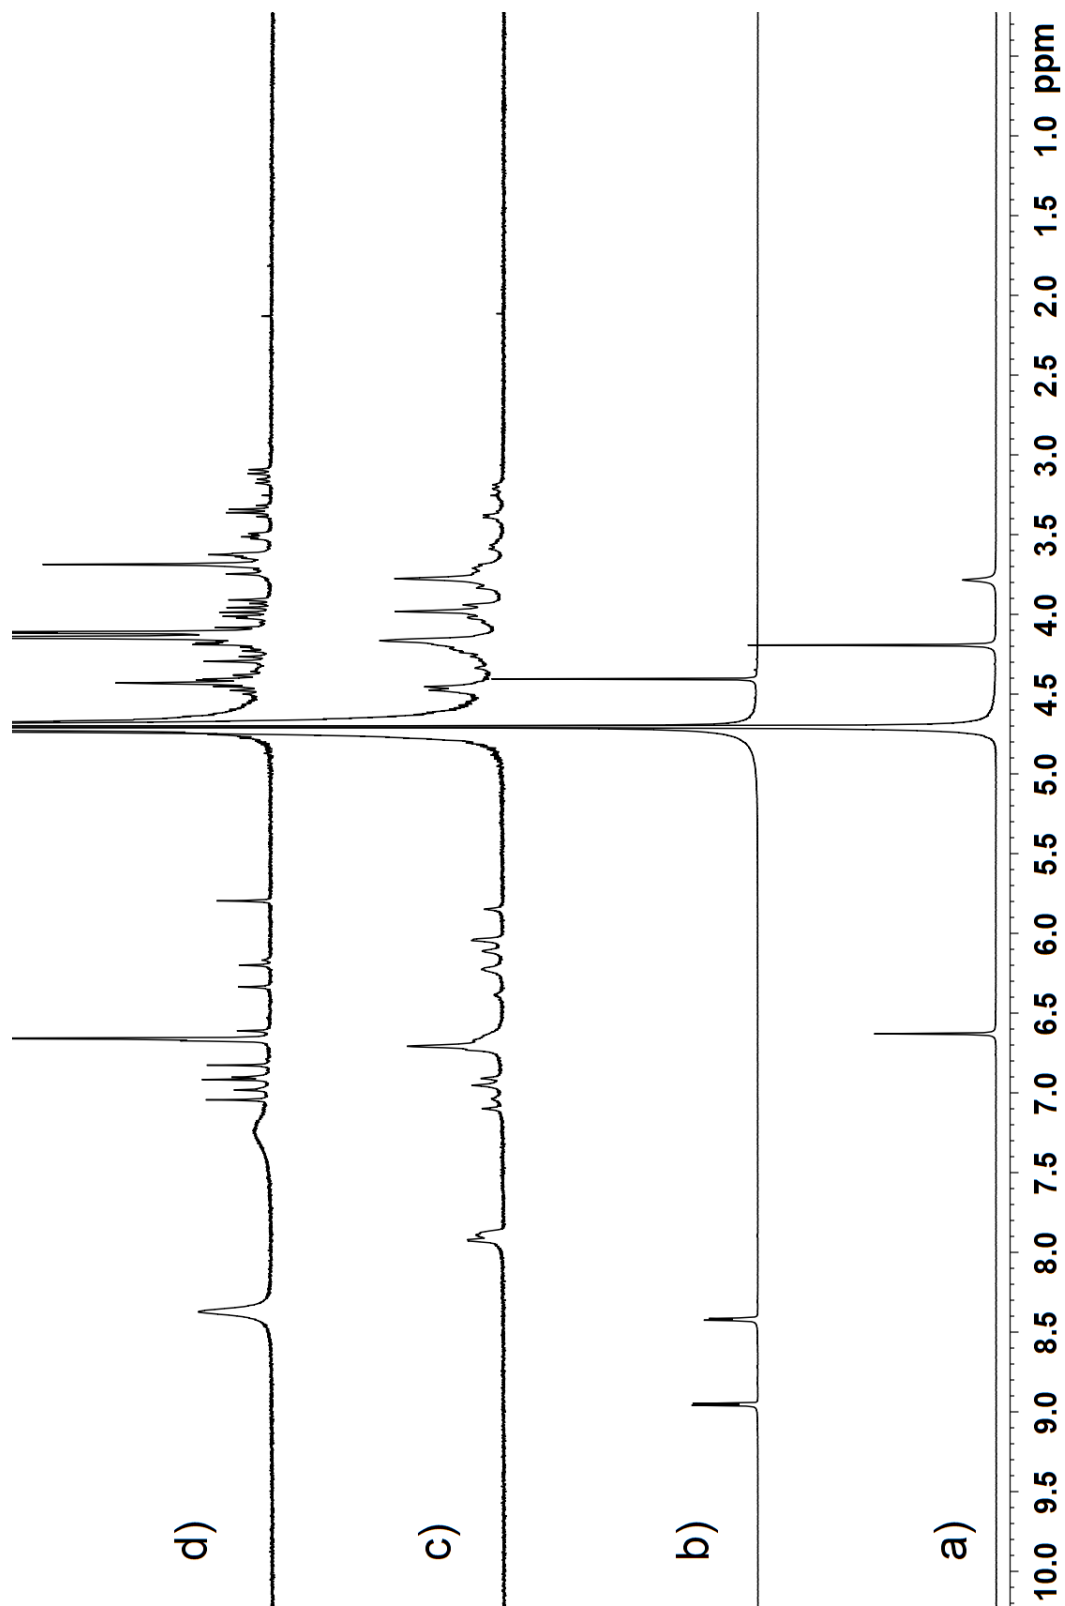

**Figure S12.** <sup>1</sup>H NMR spectra recorded (600 MHz, RT, D<sub>2</sub>O) for: a) **WP6**, b) Guest **G13**, c) an equimolar mixture of **WP6** and Guest **G13** (1 mM), and d) a 2:1 mixture of Guest **G13** (2 mM) and **WP6** (1 mM).

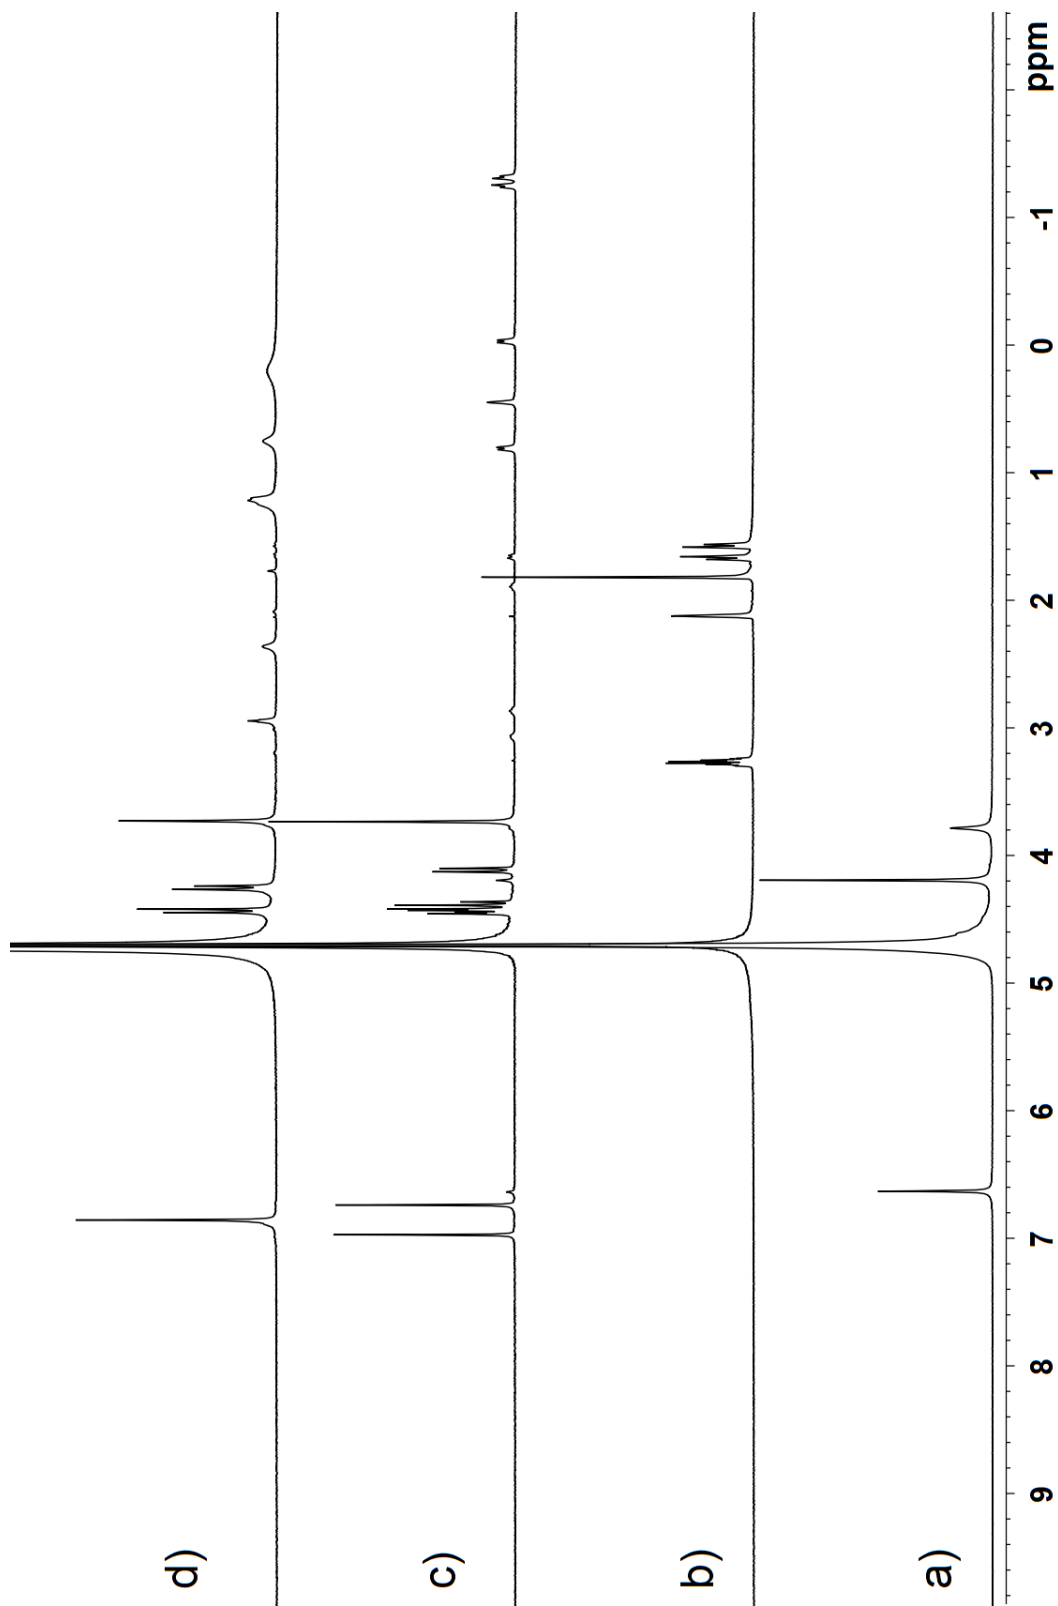

**Figure S13.** <sup>1</sup>H NMR spectra recorded (600 MHz, RT, D<sub>2</sub>O) for: a) **WP6**, b) Guest **G14**, c) an equimolar mixture of **WP6** and Guest **G14** (1 mM), and d) a 2:1 mixture of Guest **G14** (2 mM) and **WP6** (1 mM).

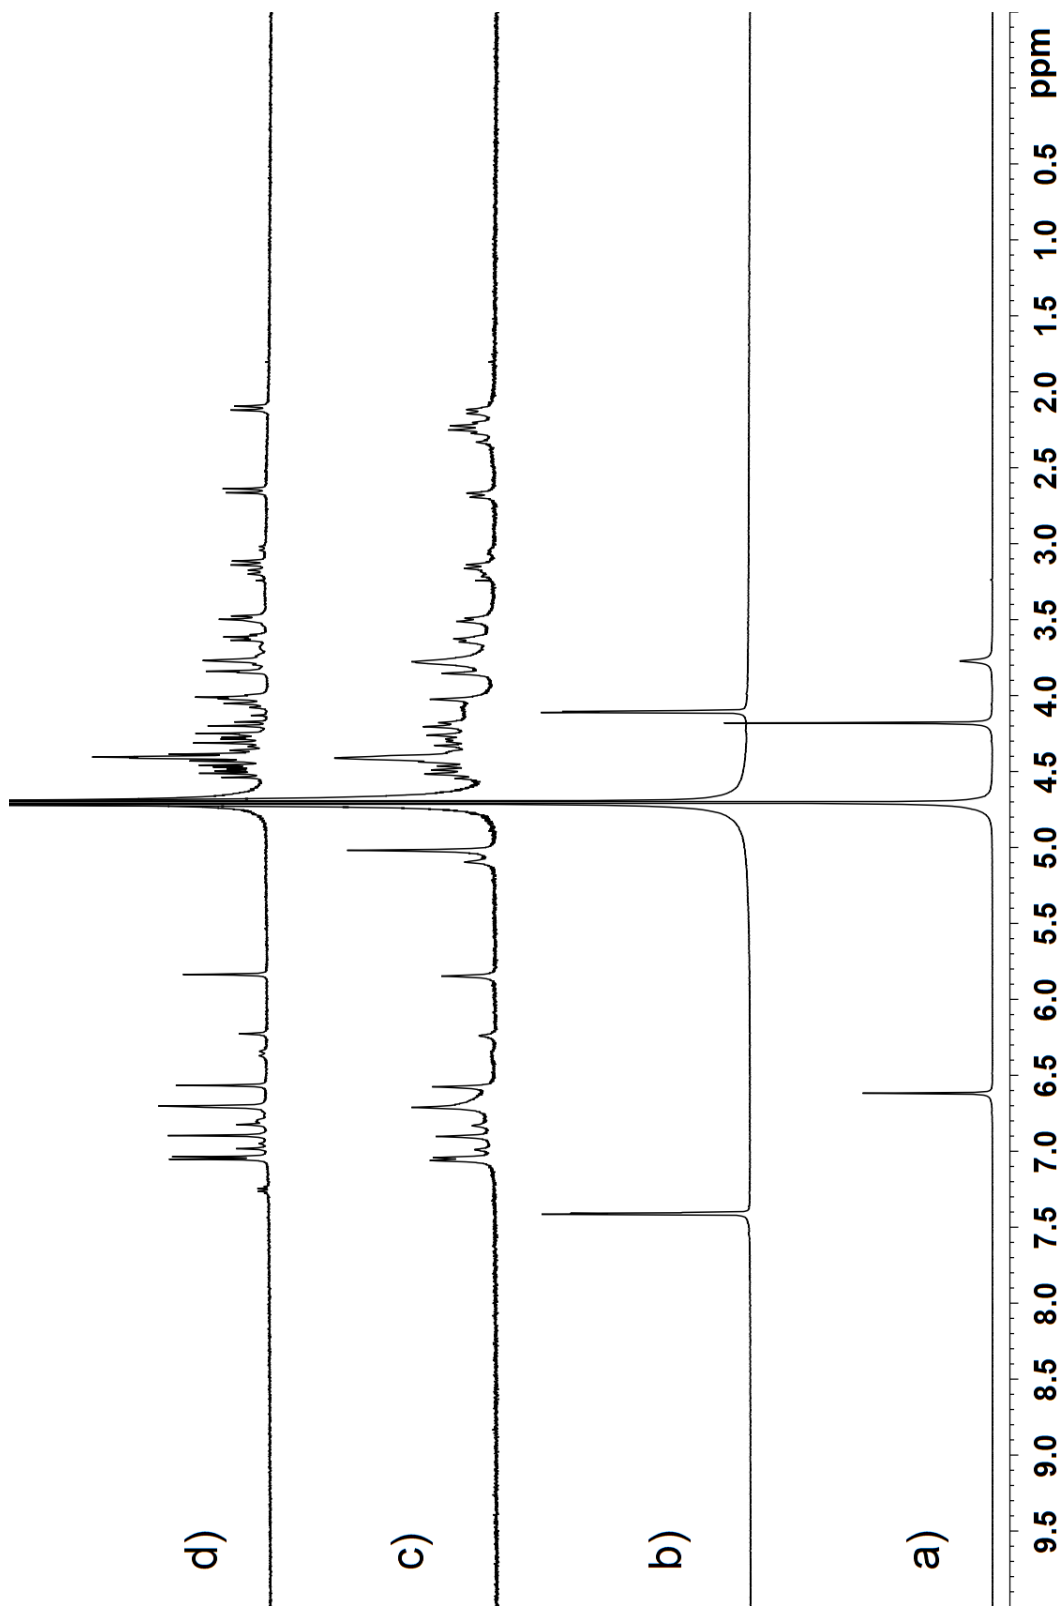

**Figure S14.**  $^1\text{H}$  NMR spectra recorded (600 MHz, RT,  $\text{D}_2\text{O}$ ) for: a) **WP6**, b) Guest **G15**, c) an equimolar mixture of **WP6** and Guest **G15** (1 mM), and d) a 2:1 mixture of Guest **G15** (2 mM) and **WP6** (1 mM).



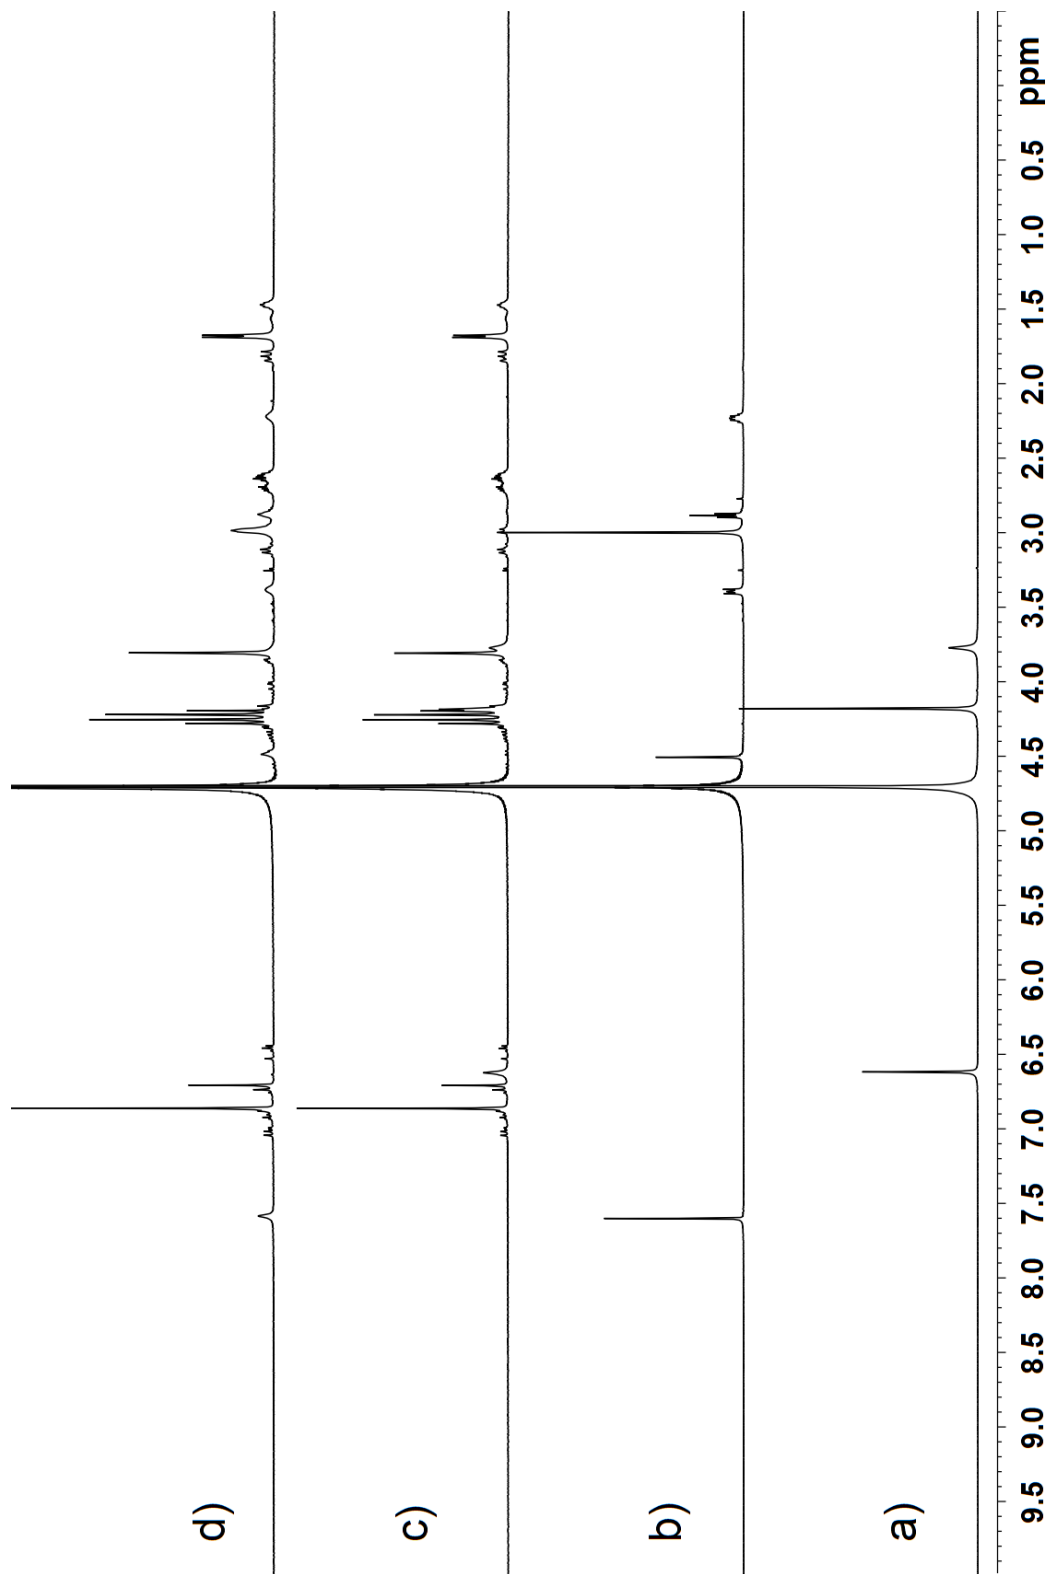

**Figure S15.** <sup>1</sup>H NMR spectra recorded (600 MHz, RT, D<sub>2</sub>O) for: a) **WP6**, b) Guest **G16**, c) an equimolar mixture of **WP6** and Guest **G16** (1 mM), and d) a 2:1 mixture of Guest **G16** (2 mM) and **WP6** (1 mM).

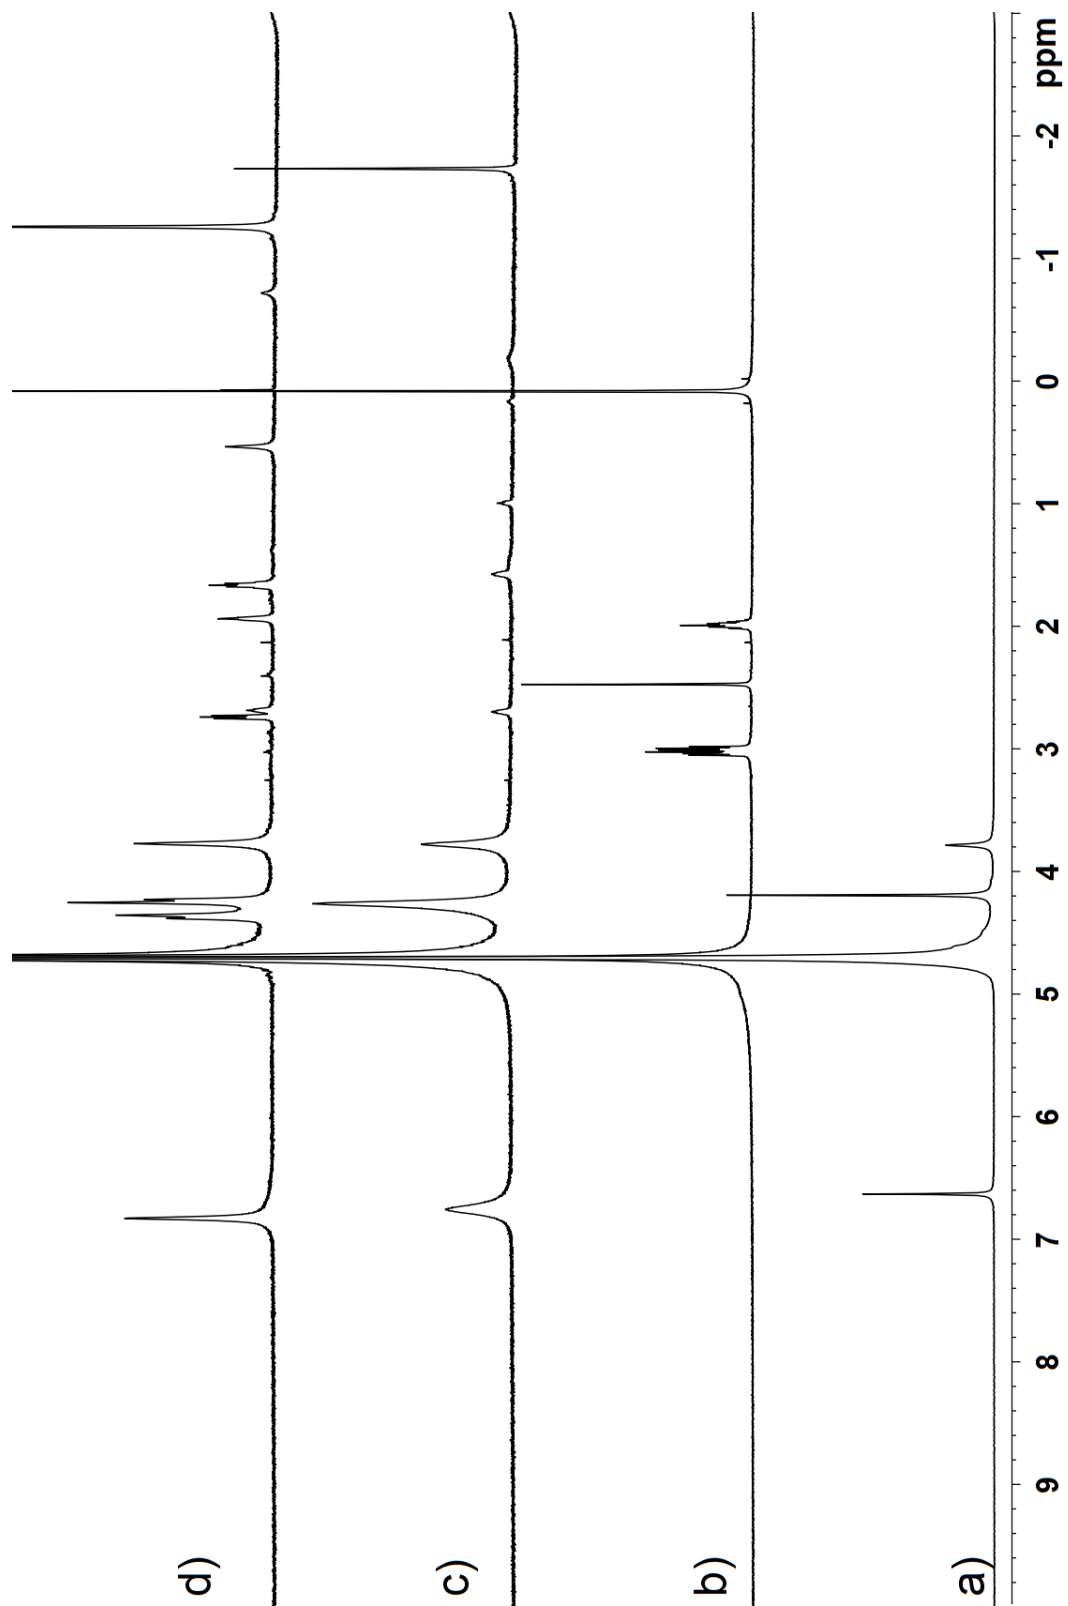

**Figure S16.** <sup>1</sup>H NMR spectra recorded (600 MHz, RT, D<sub>2</sub>O) for: a) **WP6**, b) Guest **G17**, c) an equimolar mixture of **WP6** and Guest **G17** (1 mM), and d) a 2:1 mixture of Guest **G17** (2 mM) and **WP6** (1 mM).

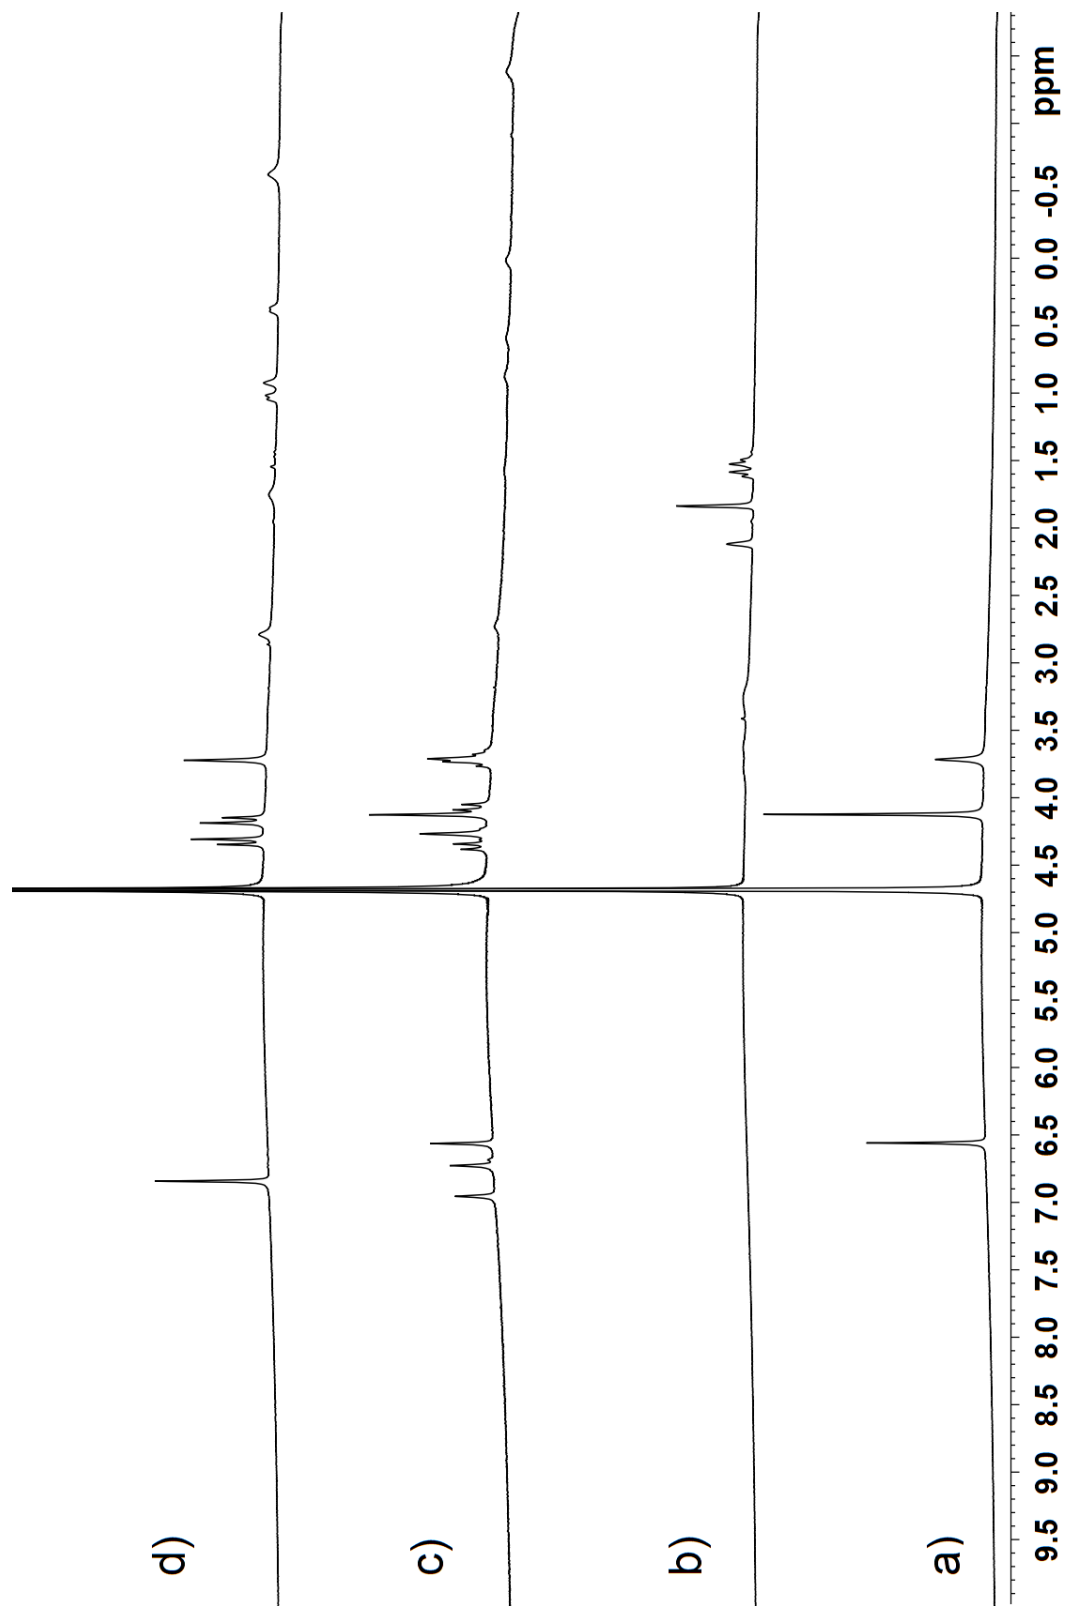

**Figure S17.**  $^1\text{H}$  NMR spectra recorded (600 MHz, RT,  $\text{D}_2\text{O}$ ) for: a) **WP6**, b) Guest **G18**, c) an equimolar mixture of **WP6** and Guest **G18** (1 mM), and d) a 2:1 mixture of Guest **G18** (2 mM) and **WP6** (1 mM).

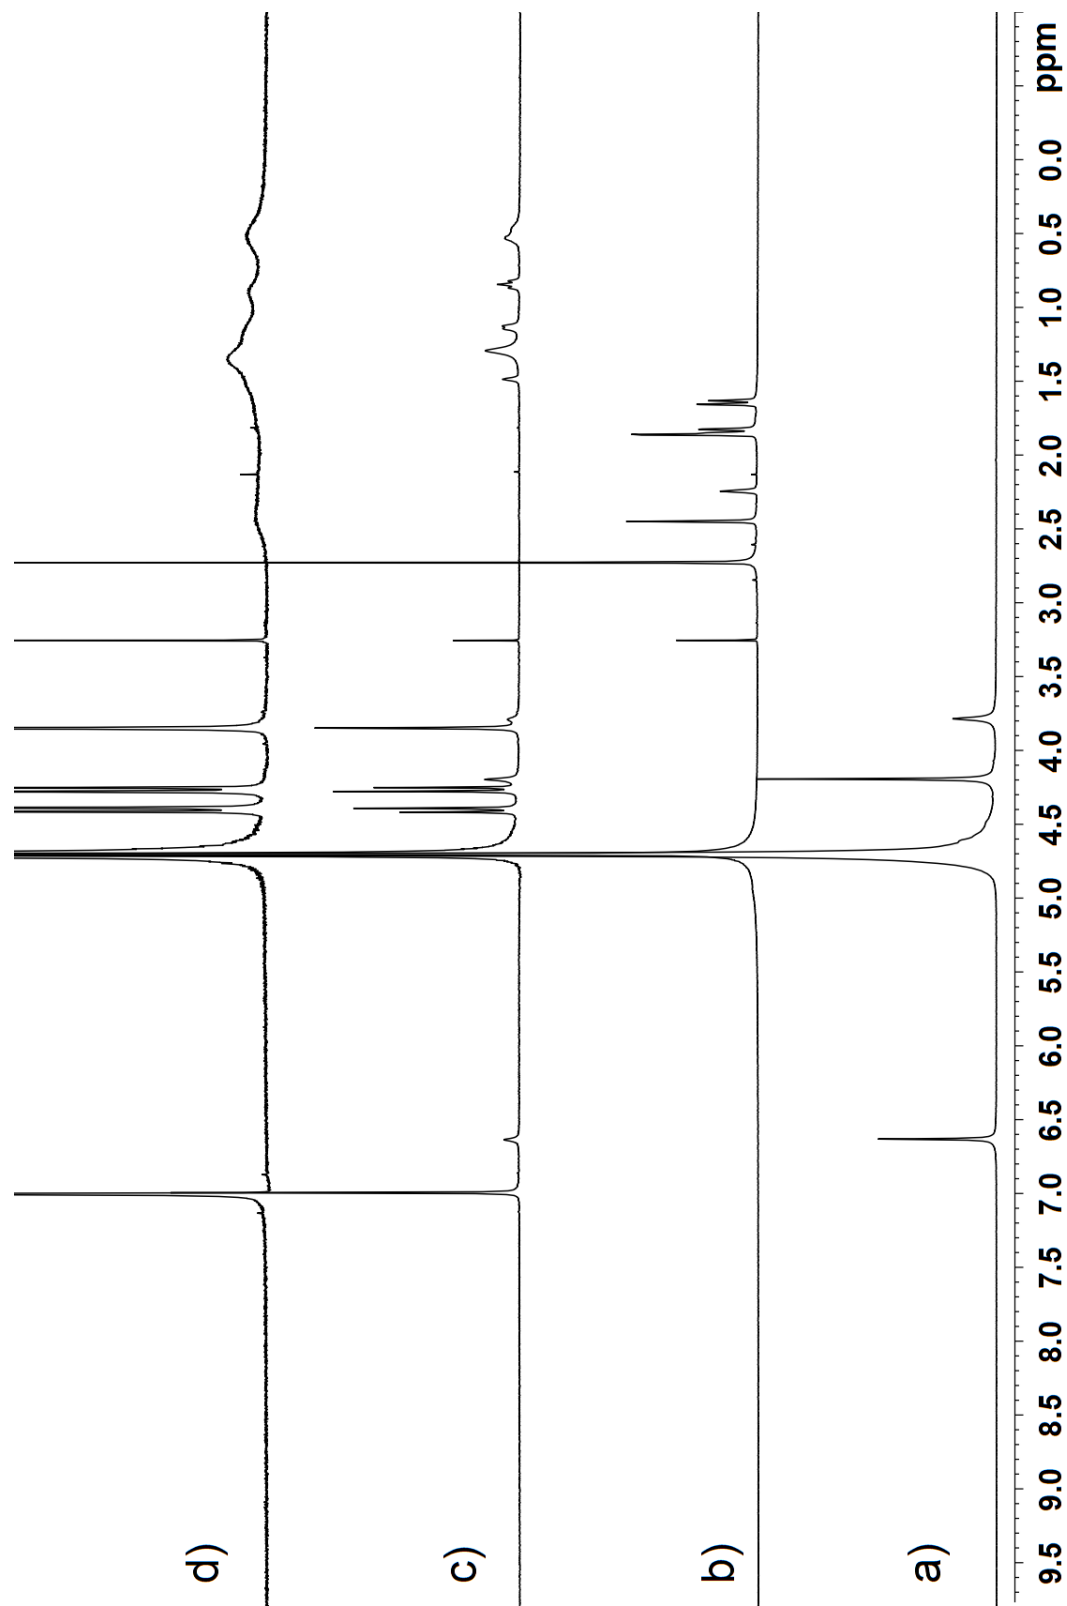

**Figure S18.**  $^1\text{H}$  NMR spectra recorded (600 MHz, RT,  $\text{D}_2\text{O}$ ) for: a) **WP6**, b) Guest **G19**, c) an equimolar mixture of **WP6** and Guest **G19** (1 mM), and d) a 2:1 mixture of Guest **G19** (2 mM) and **WP6** (1 mM).

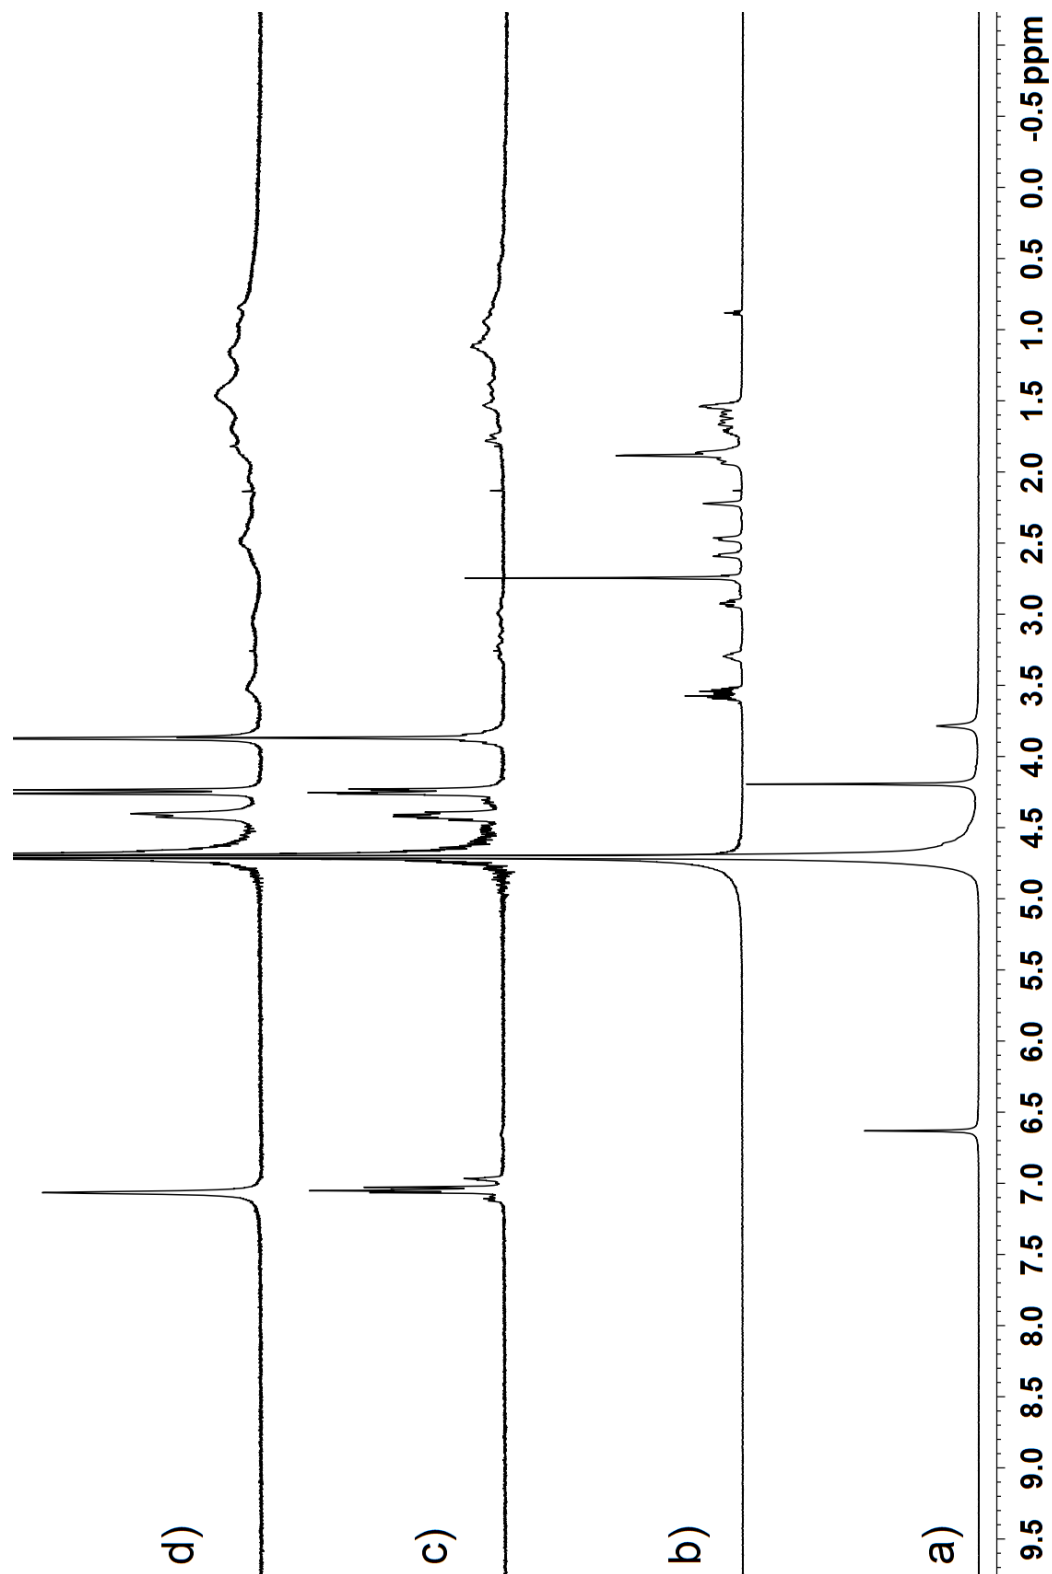

**Figure S19.** <sup>1</sup>H NMR spectra recorded (600 MHz, RT, D<sub>2</sub>O) for: a) **WP6**, b) Guest **G20**, c) an equimolar mixture of **WP6** and Guest **G20** (1 mM), and d) a 2:1 mixture of Guest **G20** (2 mM) and **WP6** (1 mM).

## **Determination of $K_a$ between various hosts and drugs of abuse using Isothermal Titration Calorimetry (ITC). Normal Guests**

All ITC experiments were conducted in the 200  $\mu\text{L}$  working volume of the sample cell of the PEAQ ITC instrument. We used an injection syringe of 40  $\mu\text{L}$  capacity. In each case, the host and guest solutions were prepared in phosphate buffered saline (PBS) at pH 7.4. The sample cell was filled to capacity (200  $\mu\text{L}$ ) with the host solution and the guest solution was titrated in (first injection = 0.4  $\mu\text{L}$ , subsequent 18 injections = 2  $\mu\text{L}$ ). In select cases, competitive titrations were required where host and an excess of weaker binding guest were included in the cell and the tighter binding guest was titrated into the cell. For direct titrations, the binding data was fitted using the 1:1 binding model in MicroCal PEAQ-ITC analysis software whereas for competitive titrations the competition binding model was used.

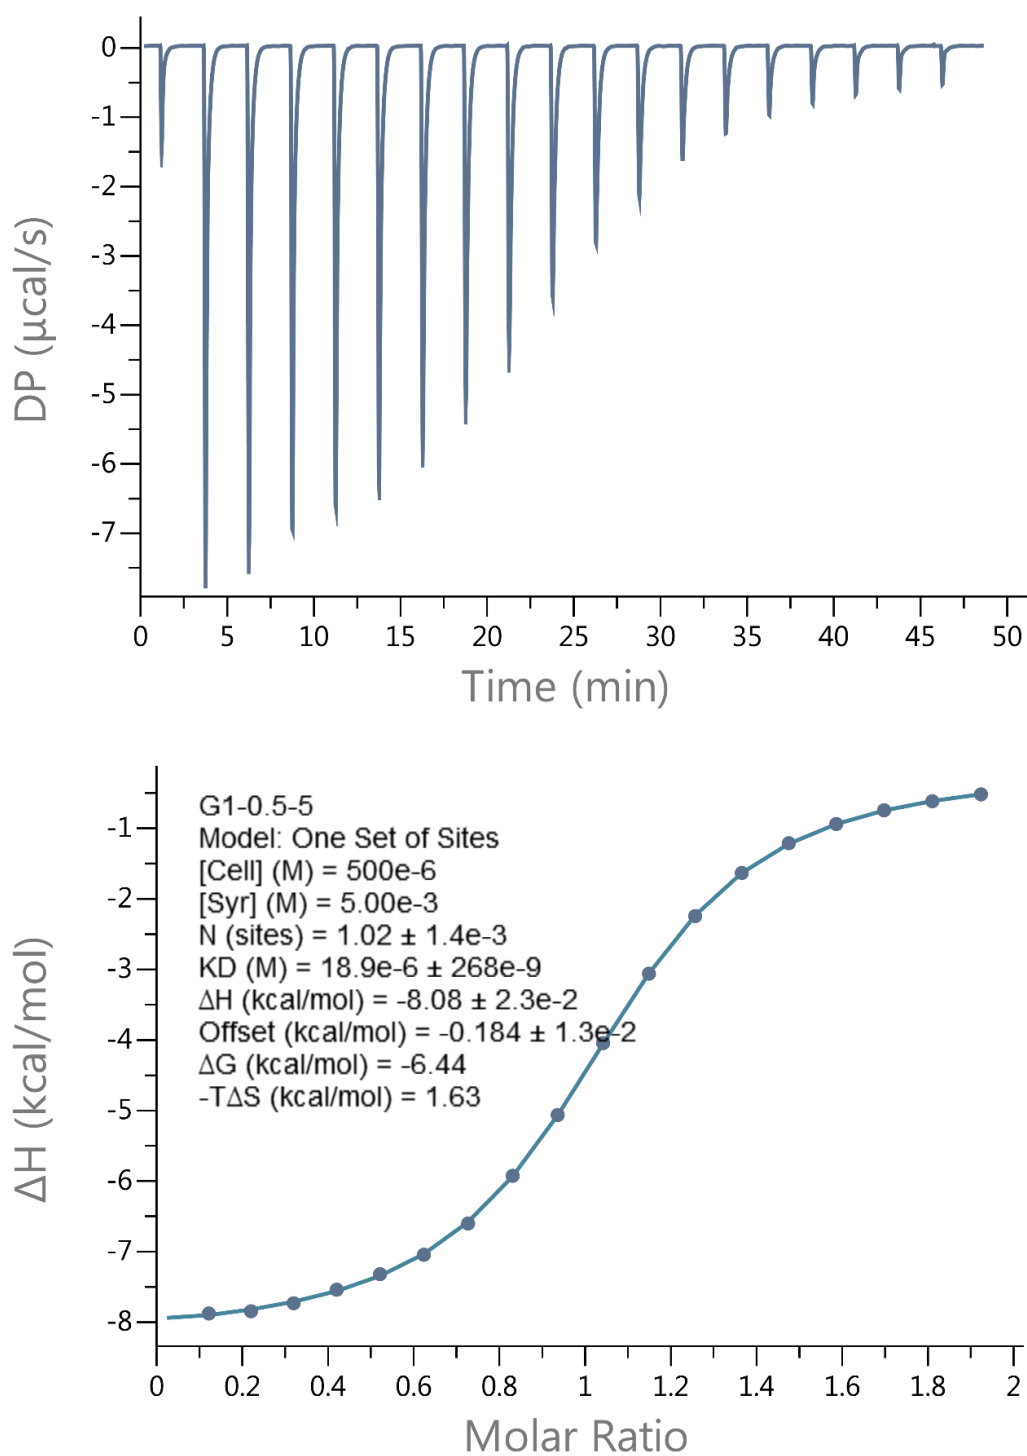

**Figure S20.** Top) Plot of DP vs time from the titration of molecular container **WP6** (500  $\mu\text{M}$ ) in the cell with guest **G1** (5.00 mM) in  $1\times$  PBS buffer solution; Bottom) plot of the  $\Delta H$  as a function of molar ratio. The solid line represents the best non-linear fit of the data to a 1:1 binding model ( $K_a = (5.29 \pm 0.07) \times 10^4 \text{ M}^{-1}$ ,  $\Delta H = -8.08 \pm 0.02 \text{ kcal/mol}$ ,  $-T\Delta S = 1.63 \text{ kcal/mol}$ ).

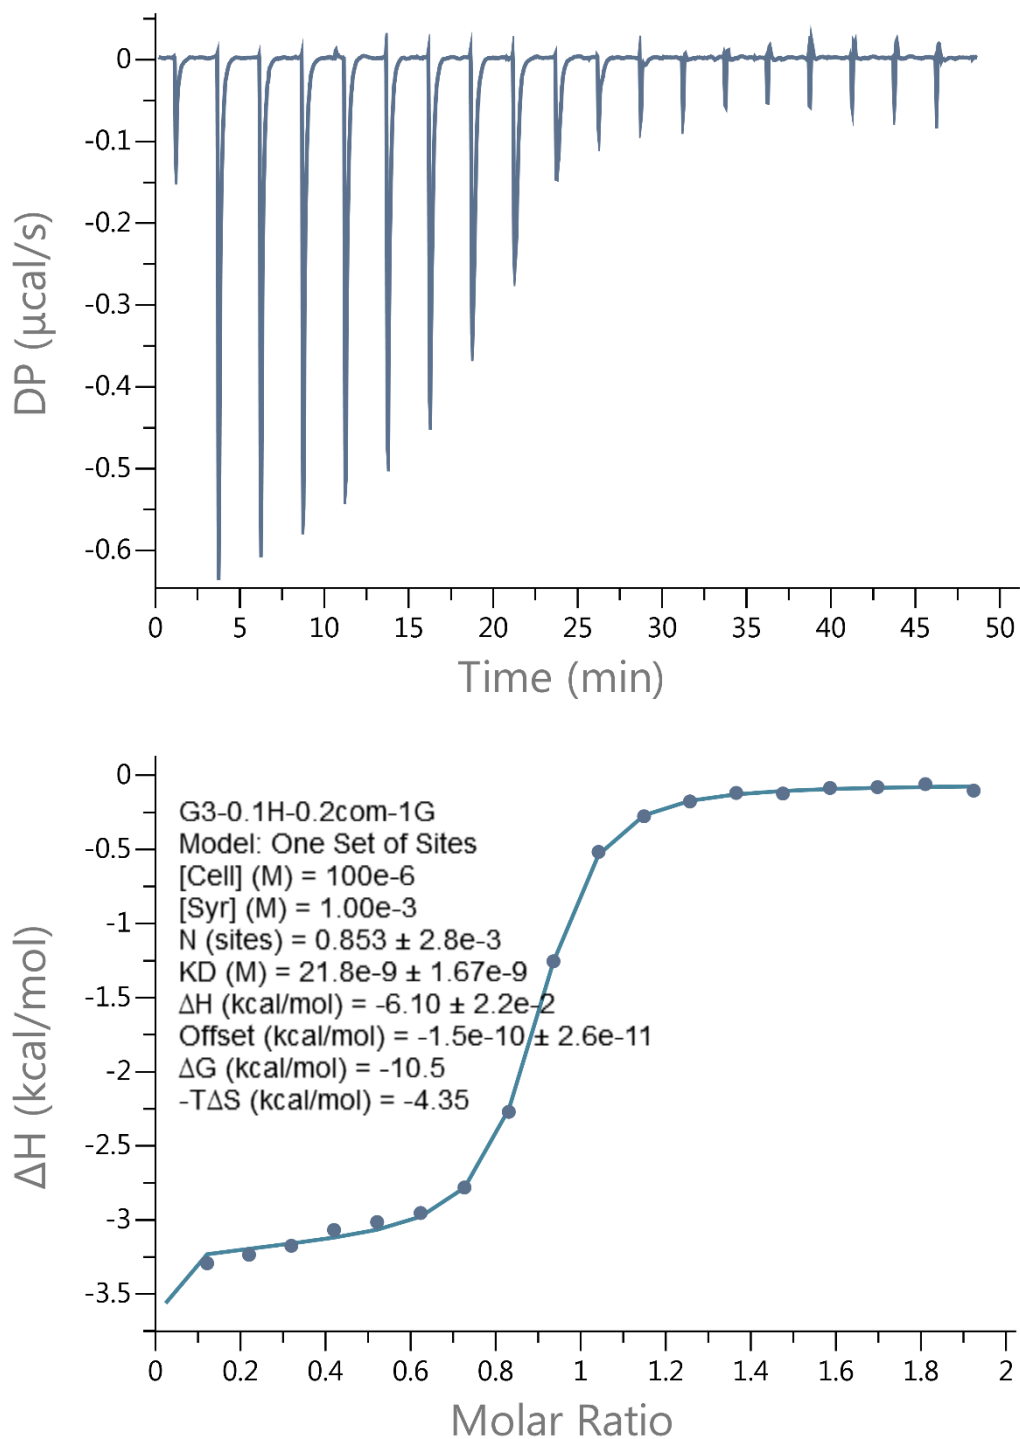

**Figure S21.** Top) Plot of DP vs time from the titration of molecular container **WP6** (100  $\mu\text{M}$ ) and competitive guest **G7** (200  $\mu\text{M}$ ) in the cell with guest **G2** (1.00 mM) in  $1\times$  PBS buffer solution; Bottom) Plot of the  $\Delta H$  as a function of molar ratio. The solid line represents the best non-linear fit of the data to a 1:1 binding model ( $K_a = (4.59 \pm 0.35) \times 10^7 \text{ M}^{-1}$ ,  $\Delta H = -6.10 \pm 0.02 \text{ kcal/mol}$ ,  $-T\Delta S = -4.35 \text{ kcal/mol}$ ).



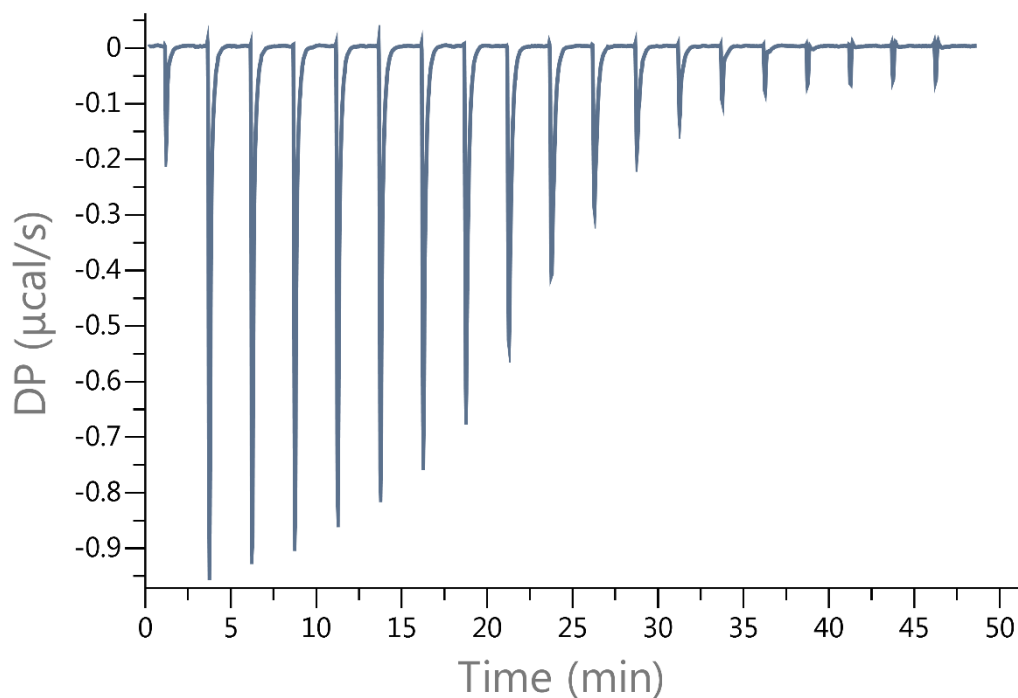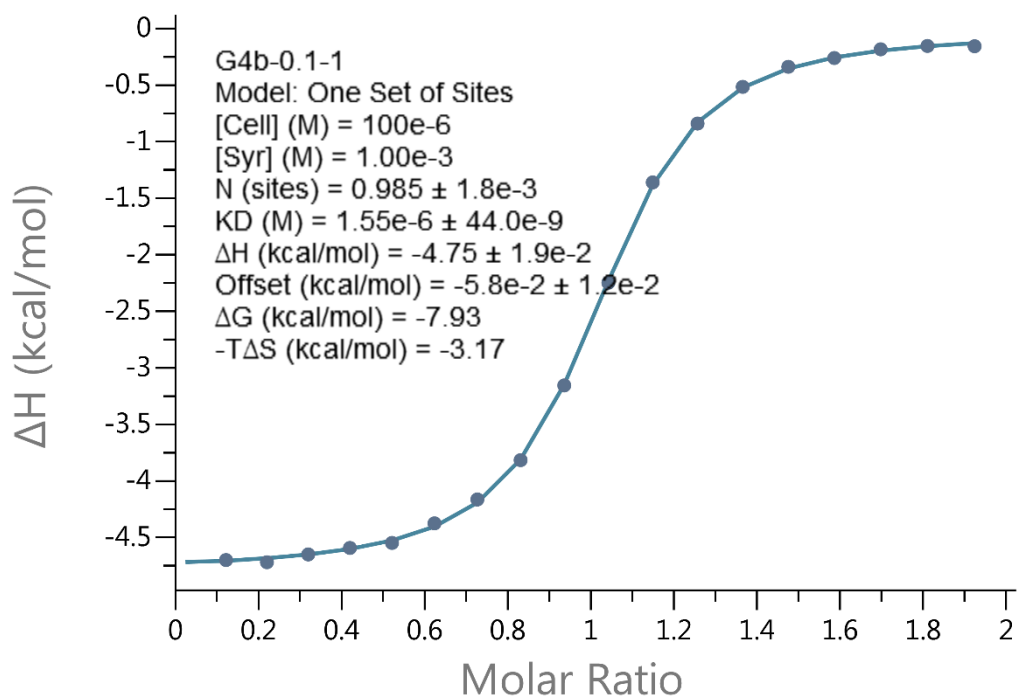

**Figure S22.** Top) Plot of DP vs time from the titration of molecular container **WP6** (100  $\mu\text{M}$ ) in the cell with guest **G3** (1.00 mM) in  $1\times$  PBS buffer solution; Bottom) plot of the  $\Delta H$  as a function of molar ratio. The solid line represents the best non-linear fit of the data to a 1:1 binding model ( $K_a = (6.45 \pm 0.18) \times 10^4 \text{ M}^{-1}$ ,  $\Delta H = -4.75 \pm 0.02 \text{ kcal/mol}$ ,  $-T\Delta S = -3.17 \text{ kcal/mol}$ ).

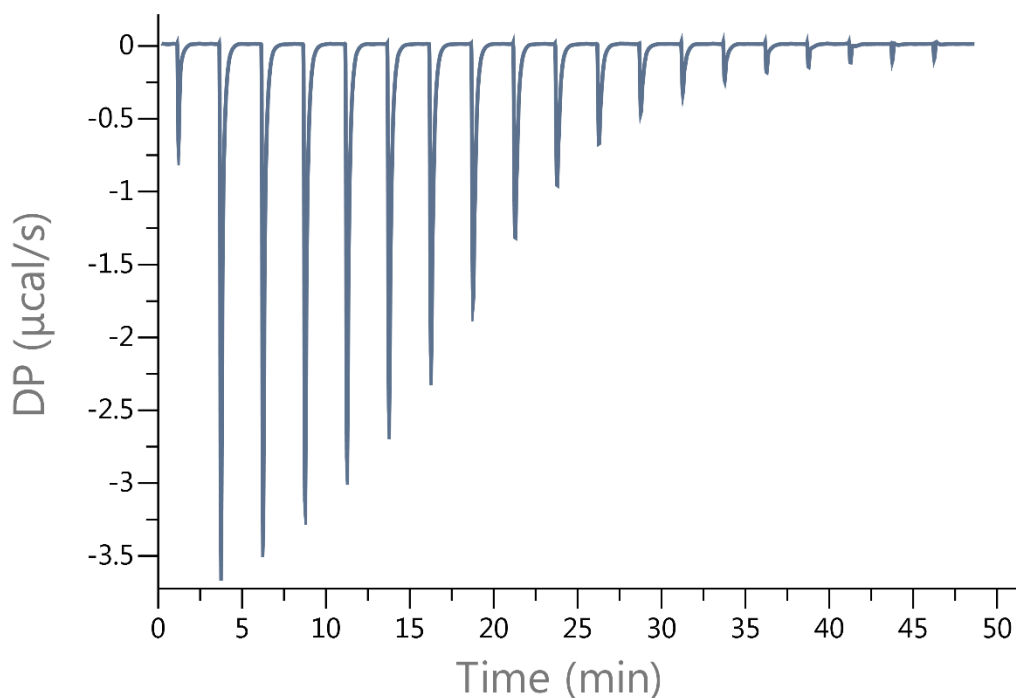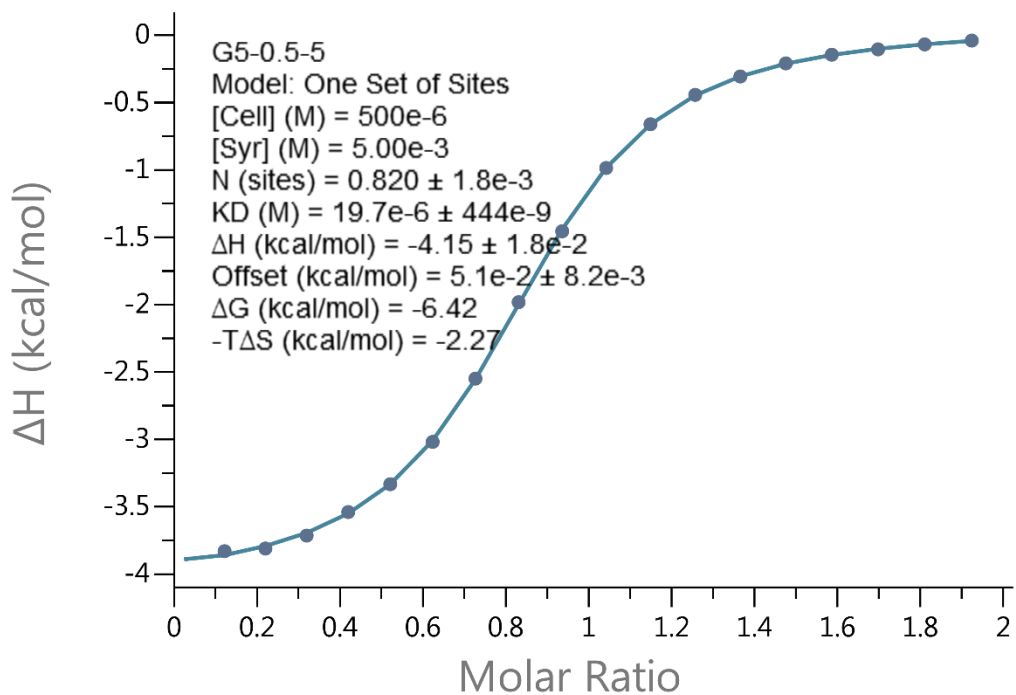

**Figure S23.** Top) Plot of DP vs time from the titration of molecular container **WP6** (500  $\mu\text{M}$ ) in the cell with guest **G4** (5.00 mM) in  $1\times$  PBS buffer solution; Bottom) plot of the  $\Delta H$  as a function of molar ratio. The solid line represents the best non-linear fit of the data to a 1:1 binding model ( $K_a = (5.08 \pm 0.11) \times 10^4 \text{ M}^{-1}$ ,  $\Delta H = -4.15 \pm 0.02 \text{ kcal/mol}$ ,  $-T\Delta S = -2.27 \text{ kcal/mol}$ ).

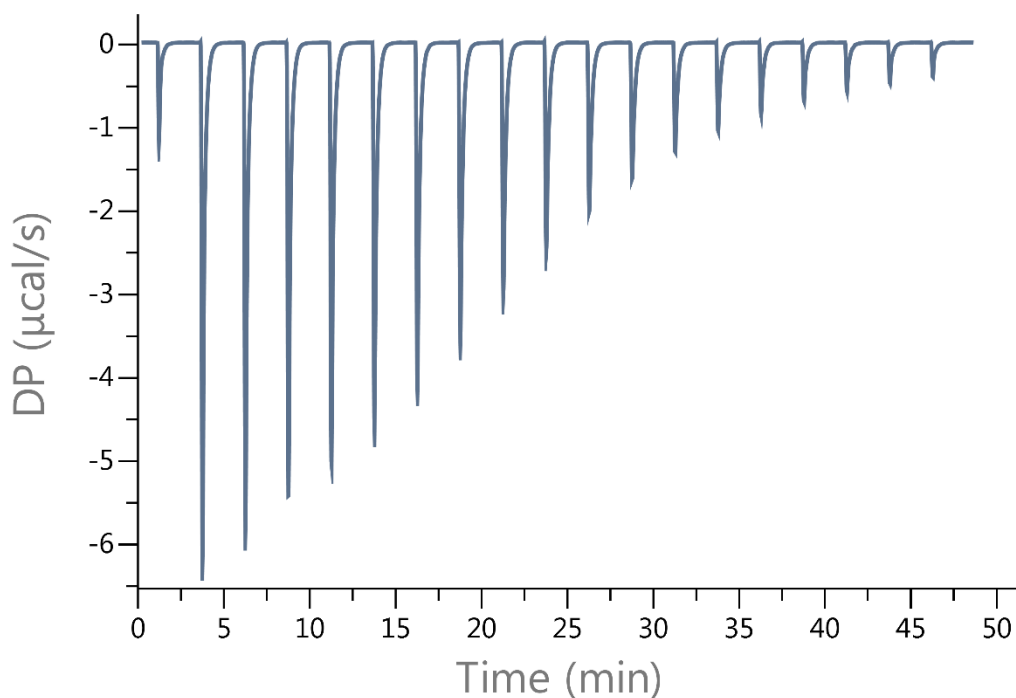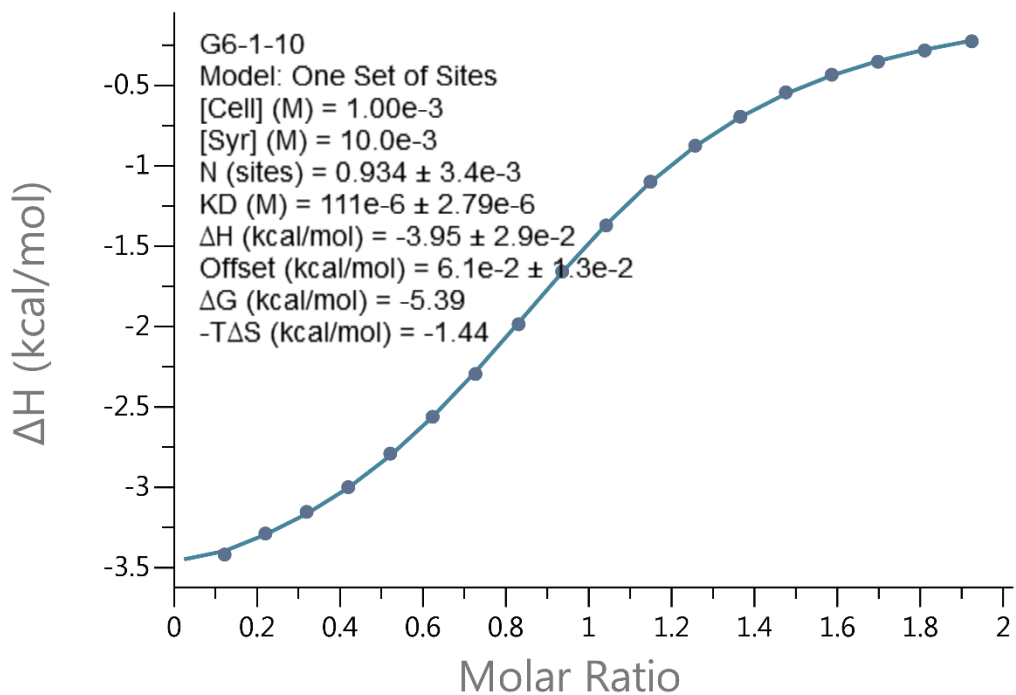

**Figure S24.** Top) Plot of DP vs time from the titration of molecular container **WP6** (1.00 mM) in the cell with guest **G5** (10.00 mM) in 1× PBS buffer solution; Bottom) plot of the  $\Delta H$  as a function of molar ratio. The solid line represents the best non-linear fit of the data to a 1:1 binding model ( $K_a = (9.01 \pm 0.23) \times 10^3 \text{ M}^{-1}$ ,  $\Delta H = -3.95 \pm 0.03 \text{ kcal/mol}$ ,  $-T\Delta S = -1.44 \text{ kcal/mol}$ ).

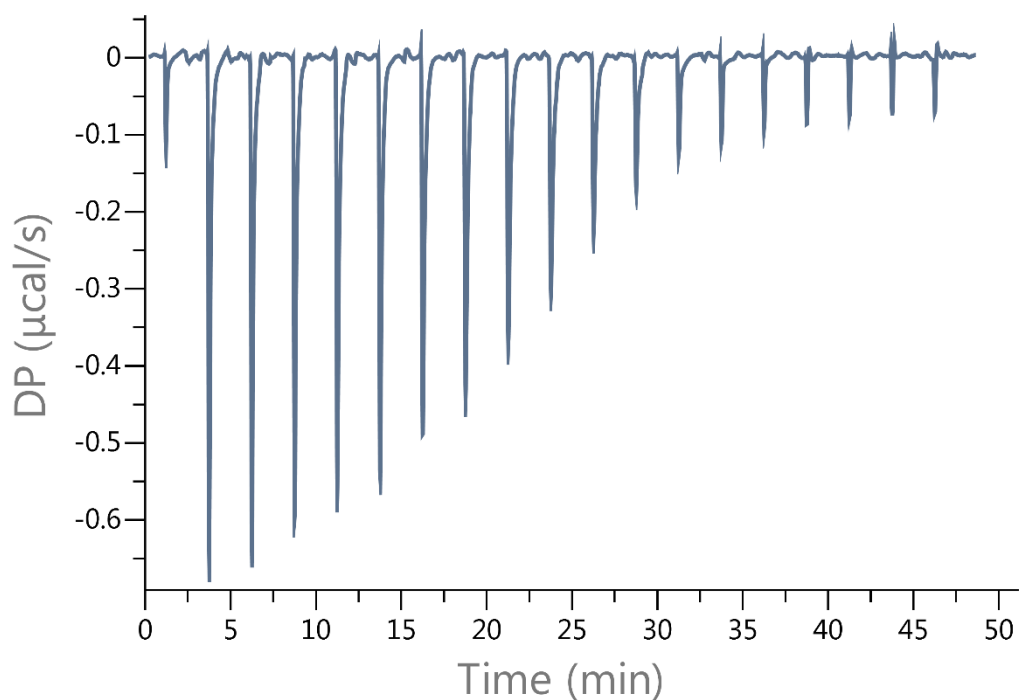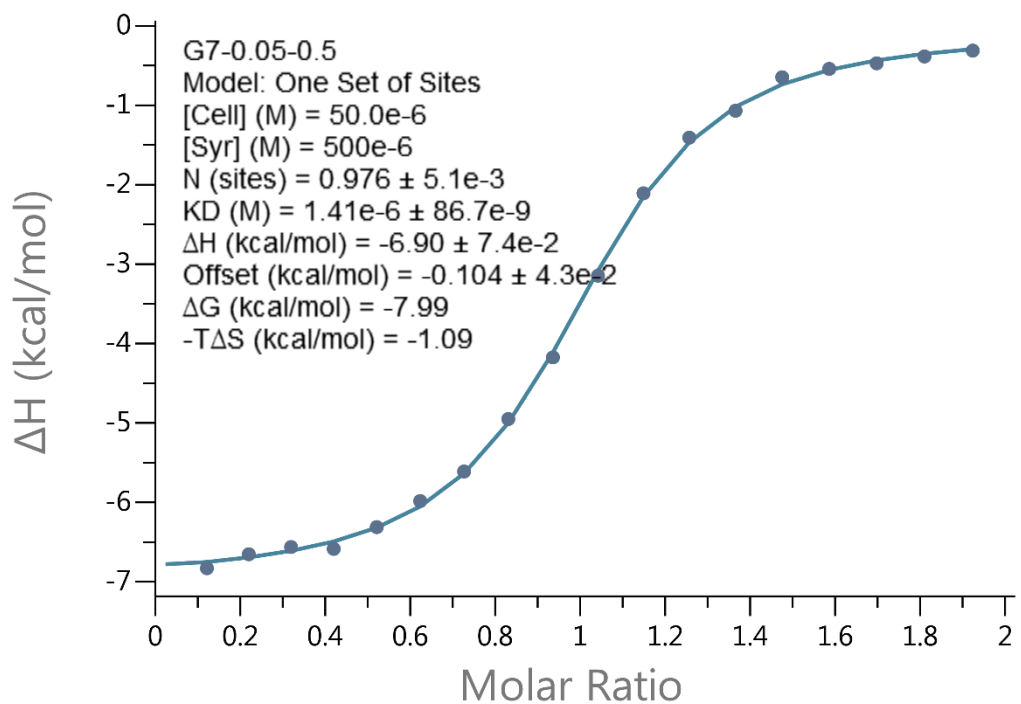

**Figure S25.** Top) Plot of DP vs time from the titration of molecular container **WP6** (50 μM) in the cell with guest **G6** (0.5 mM) in 1× PBS buffer solution; Bottom) plot of the ΔH as a function of molar ratio. The solid line represents the best non-linear fit of the data to a 1:1 binding model ( $K_a = (7.09 \pm 0.44) \times 10^5 \text{ M}^{-1}$ ,  $\Delta H = -6.90 \pm 0.07 \text{ kcal/mol}$ ,  $-T\Delta S = -1.09 \text{ kcal/mol}$ ).

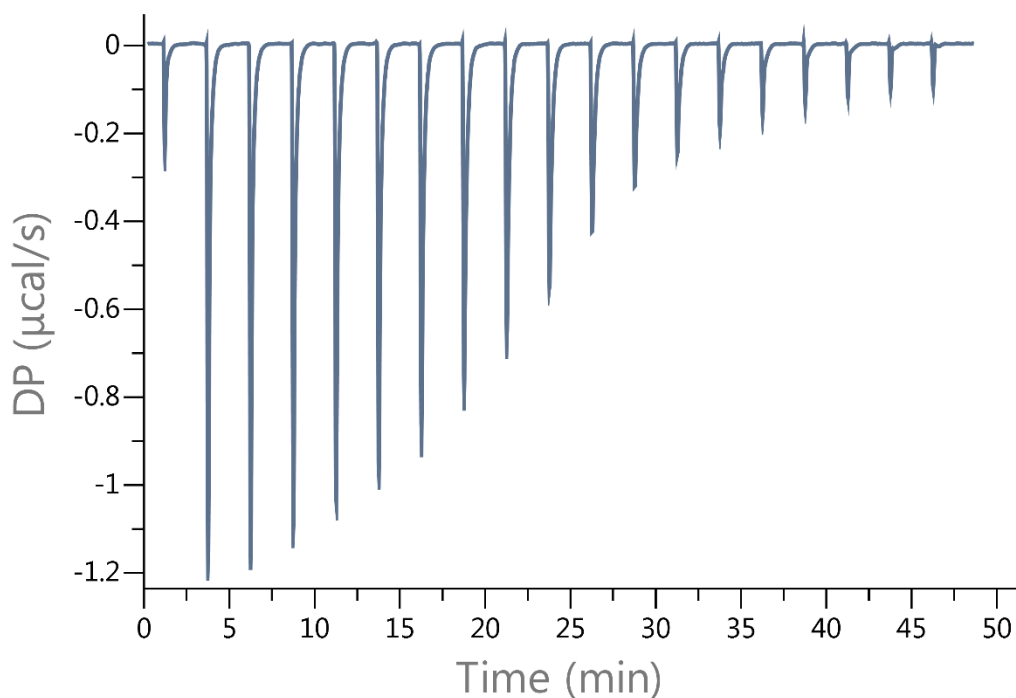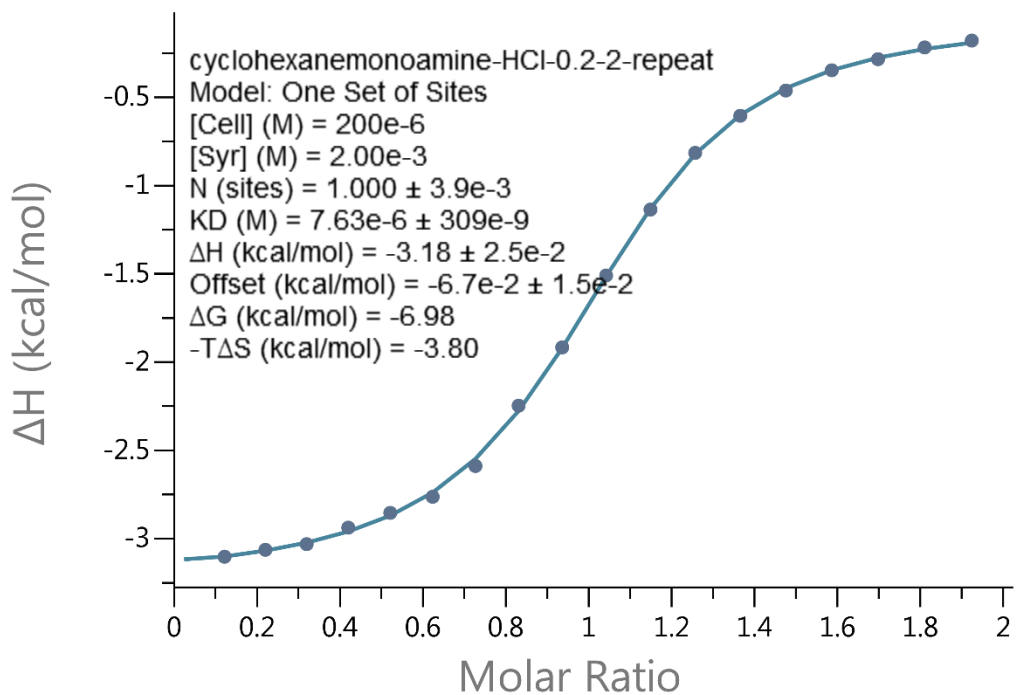

**Figure S26.** Top) Plot of DP vs time from the titration of molecular container **WP6** (200  $\mu\text{M}$ ) in the cell with guest **G7** (2.0 mM) in  $1\times$  PBS buffer solution; Bottom) plot of the  $\Delta H$  as a function of molar ratio. The solid line represents the best non-linear fit of the data to a 1:1 binding model ( $K_a = (1.31 \pm 0.05) \times 10^5 \text{ M}^{-1}$ ,  $\Delta H = -3.18 \pm 0.02 \text{ kcal/mol}$ ,  $-T\Delta S = -3.80 \text{ kcal/mol}$ ).

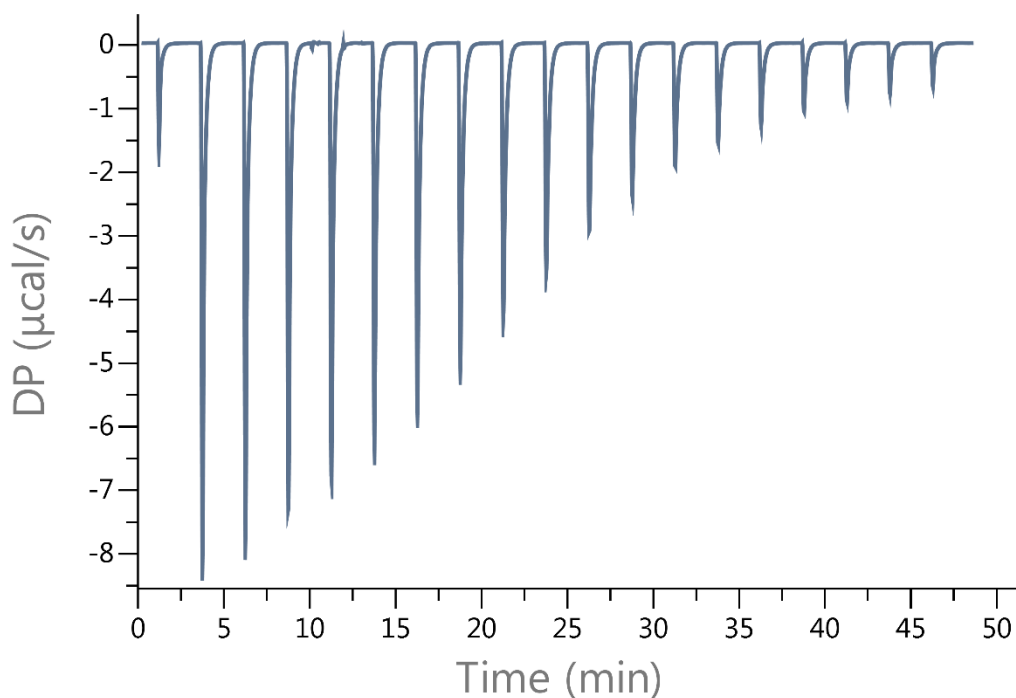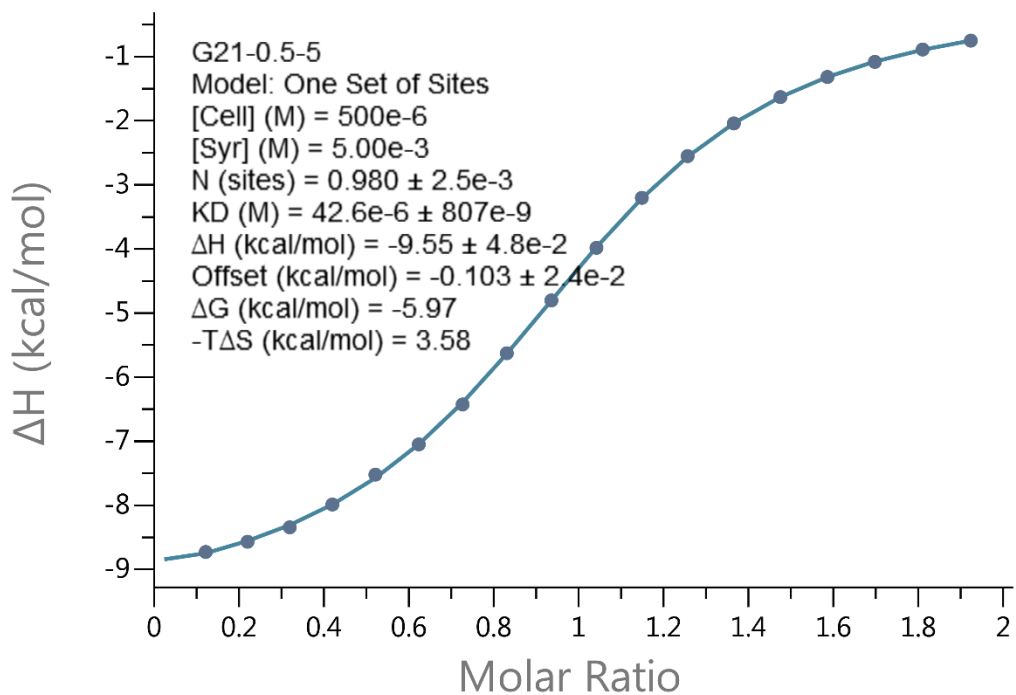

**Figure S27.** Top) Plot of DP vs time from the titration of molecular container **WP6** (0.50 mM) in the cell with guest **G8** (5.00 mM) in  $1\times$  PBS buffer solution; Bottom) plot of the  $\Delta H$  as a function of molar ratio. The solid line represents the best non-linear fit of the data to a 1:1 binding model ( $K_a = (2.35 \pm 0.04) \times 10^5 \text{ M}^{-1}$ ,  $\Delta H = -9.55 \pm 0.05 \text{ kcal/mol}$ ,  $-T\Delta S = 3.58 \text{ kcal/mol}$ ).

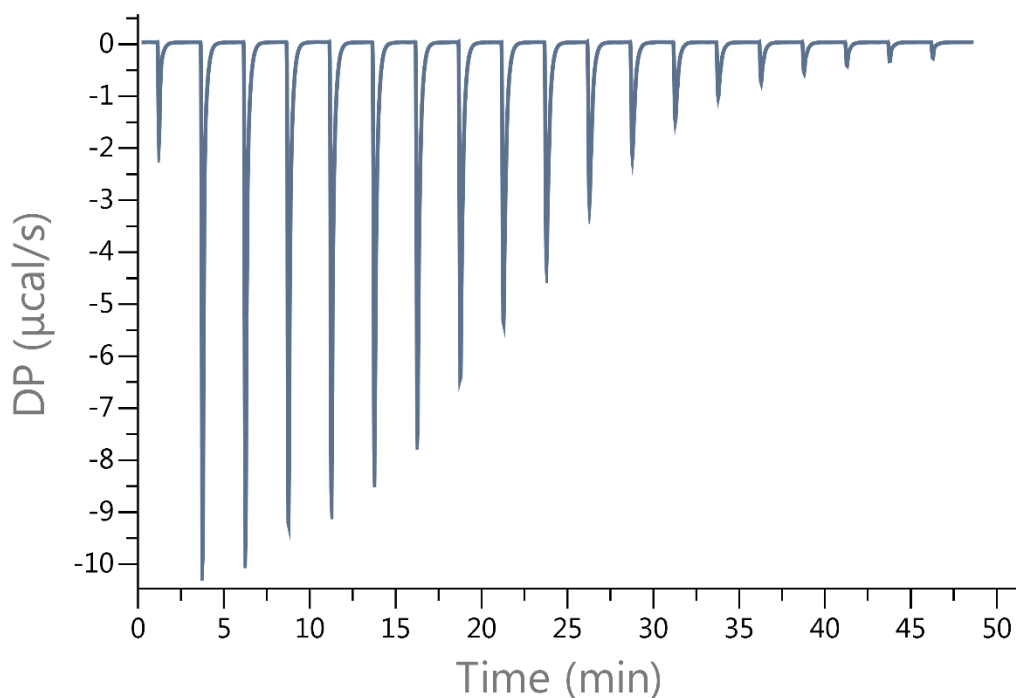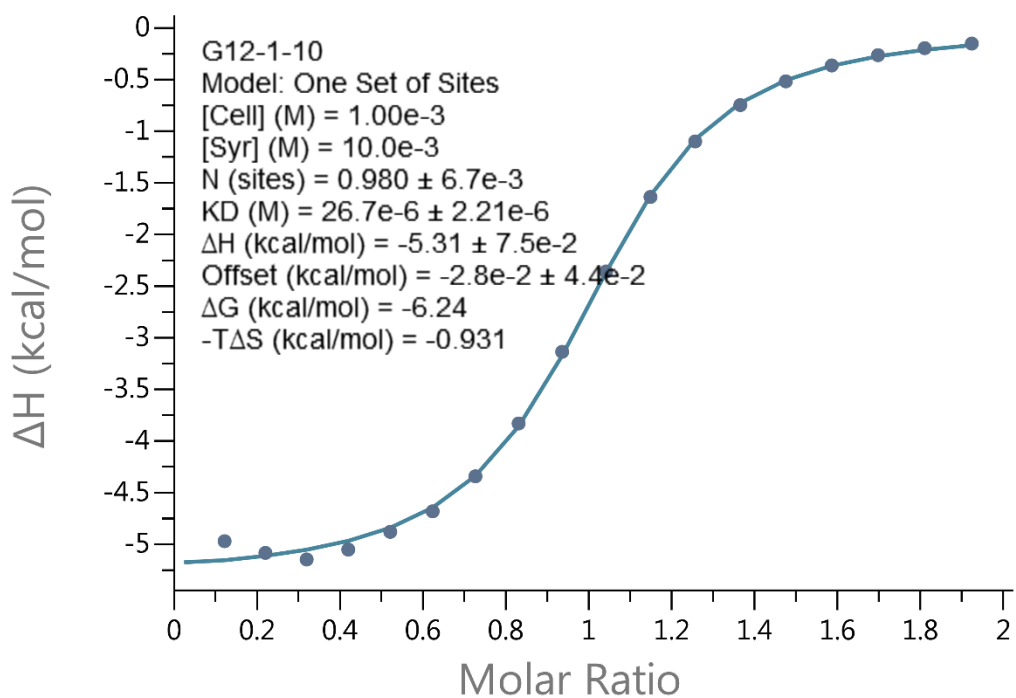

**Figure S28.** Top) Plot of DP vs time from the titration of molecular container **WP6** (1.00 mM) in the cell with guest **G9** (10.00 mM) in  $1\times$  PBS buffer solution; Bottom) plot of the  $\Delta H$  as a function of molar ratio. The solid line represents the best non-linear fit of the data to a 1:1 binding model ( $K_a = (3.75 \pm 0.31) \times 10^4 \text{ M}^{-1}$ ,  $\Delta H = -5.31 \pm 0.08 \text{ kcal/mol}$ ,  $-T\Delta S = -0.93 \text{ kcal/mol}$ ).

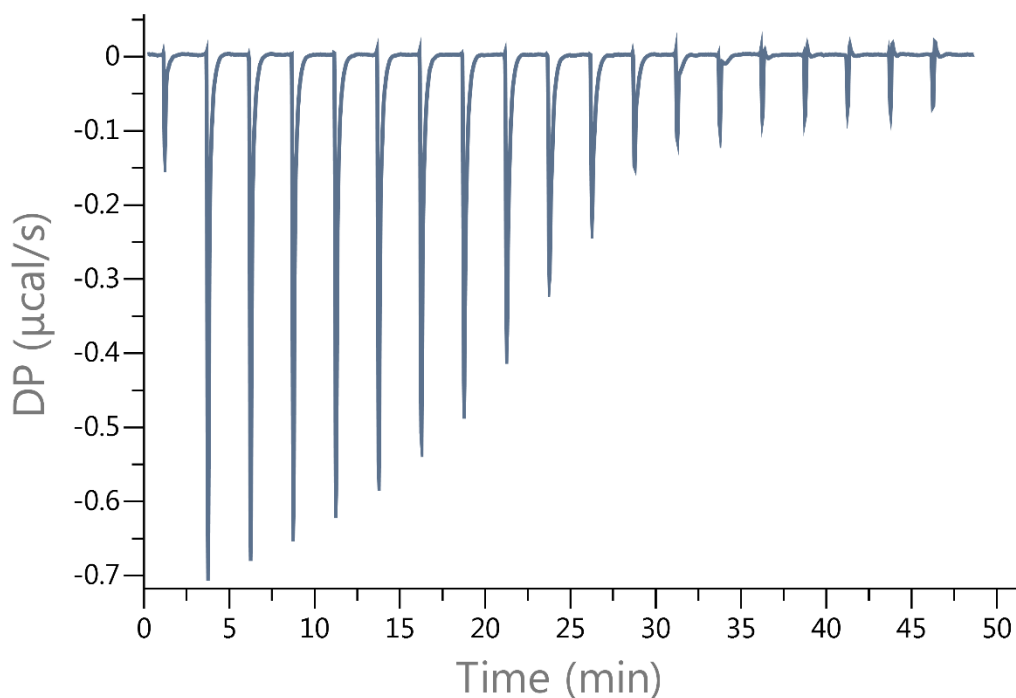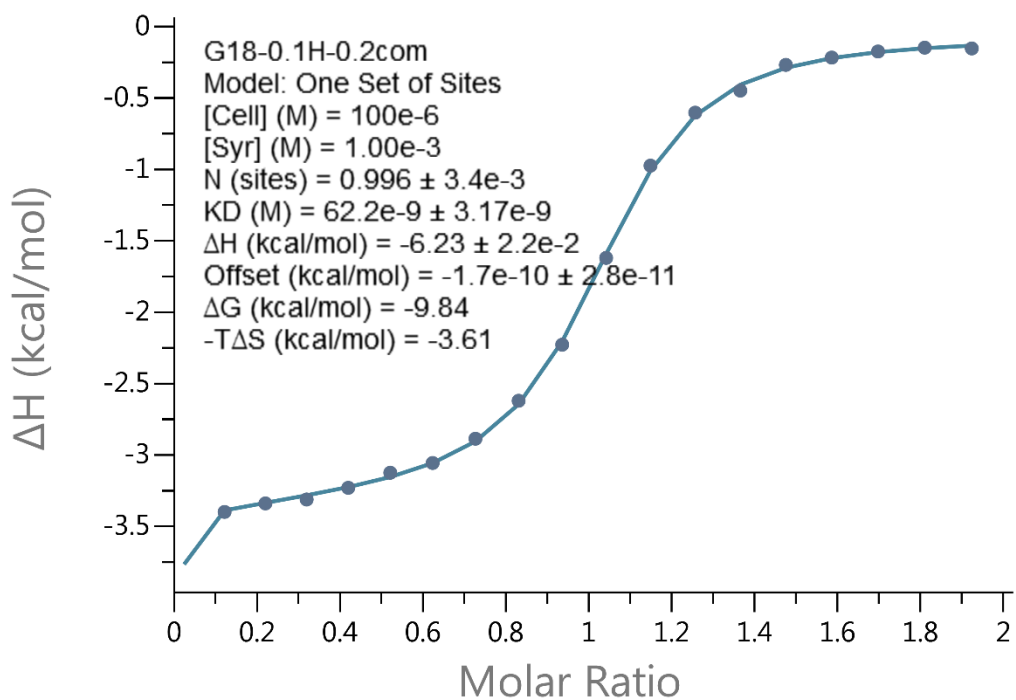

**Figure S29.** Top) Plot of DP vs time from the titration of molecular container **WP6** ( $100\ \mu\text{M}$ ) and competitive guest **G7** ( $200\ \mu\text{M}$ ) in the cell with guest **G10** ( $1.00\ \text{mM}$ ) in  $1\times$  PBS buffer solution; Bottom) plot of the  $\Delta\text{H}$  as a function of molar ratio. The solid line represents the best non-linear fit of the data to a 1:1 binding model ( $K_a = (4.59 \pm 0.35) \times 10^7\ \text{M}^{-1}$ ,  $\Delta\text{H} = -6.10 \pm 0.02\ \text{kcal/mol}$ ,  $-\text{T}\Delta\text{S} = -4.35\ \text{kcal/mol}$ ).



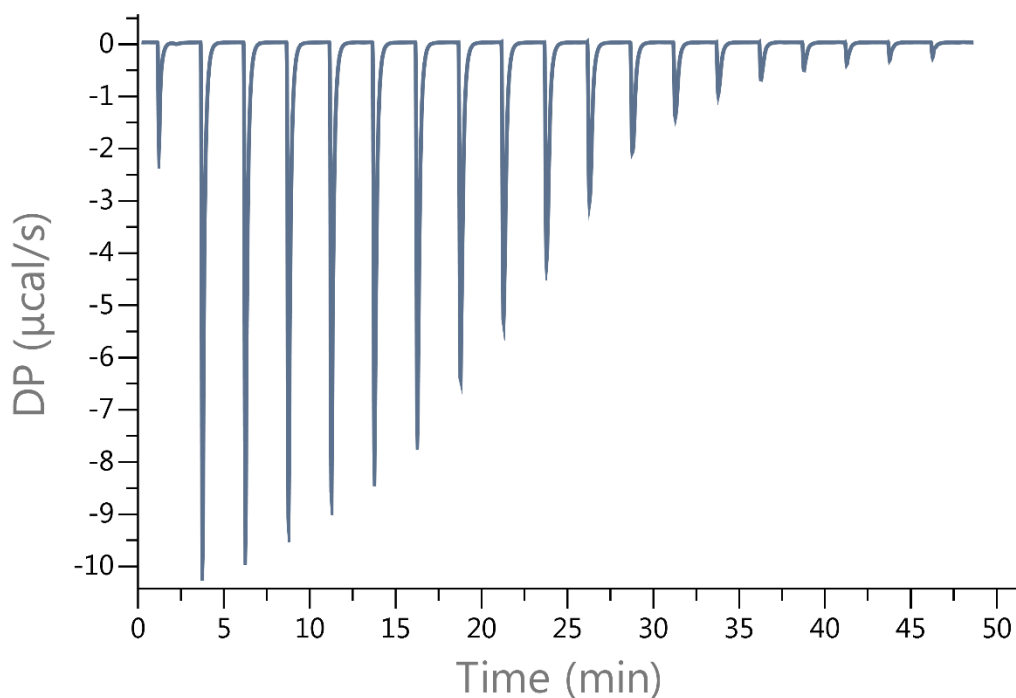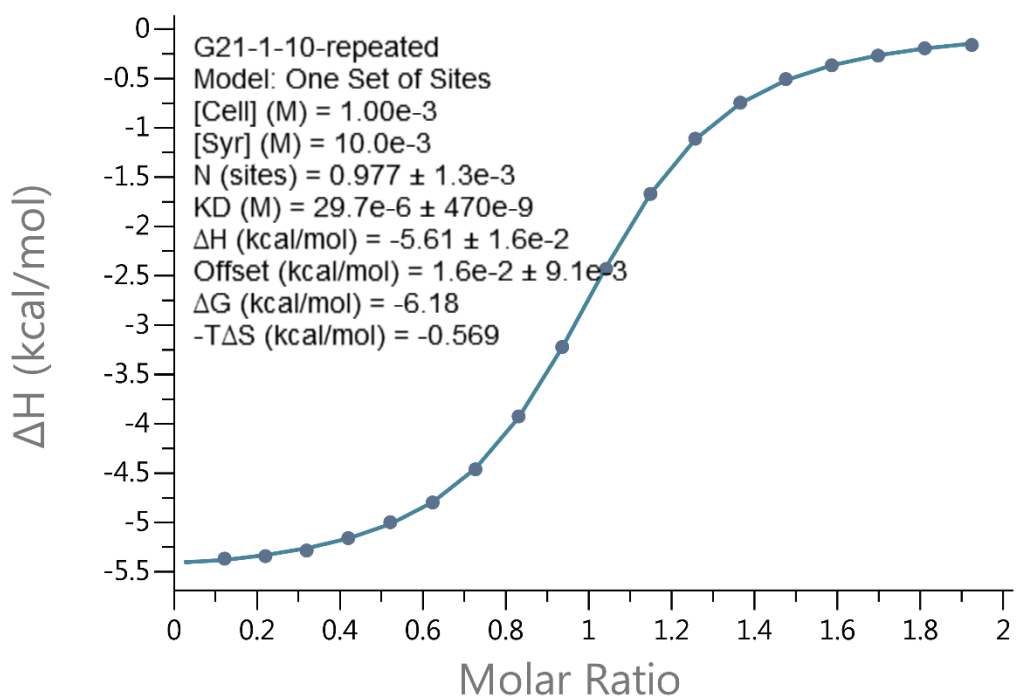

**Figure S30.** Top) Plot of DP vs time from the titration of molecular container **WP6** (1.00 mM) in the cell with guest **G11** (10.00 mM) in  $1\times$  PBS buffer solution; Bottom) plot of the  $\Delta H$  as a function of molar ratio. The solid line represents the best non-linear fit of the data to a 1:1 binding model ( $K_a = (3.37 \pm 0.05) \times 10^4 \text{ M}^{-1}$ ,  $\Delta H = -5.61 \pm 0.02 \text{ kcal/mol}$ ,  $-T\Delta S = -0.57 \text{ kcal/mol}$ ).

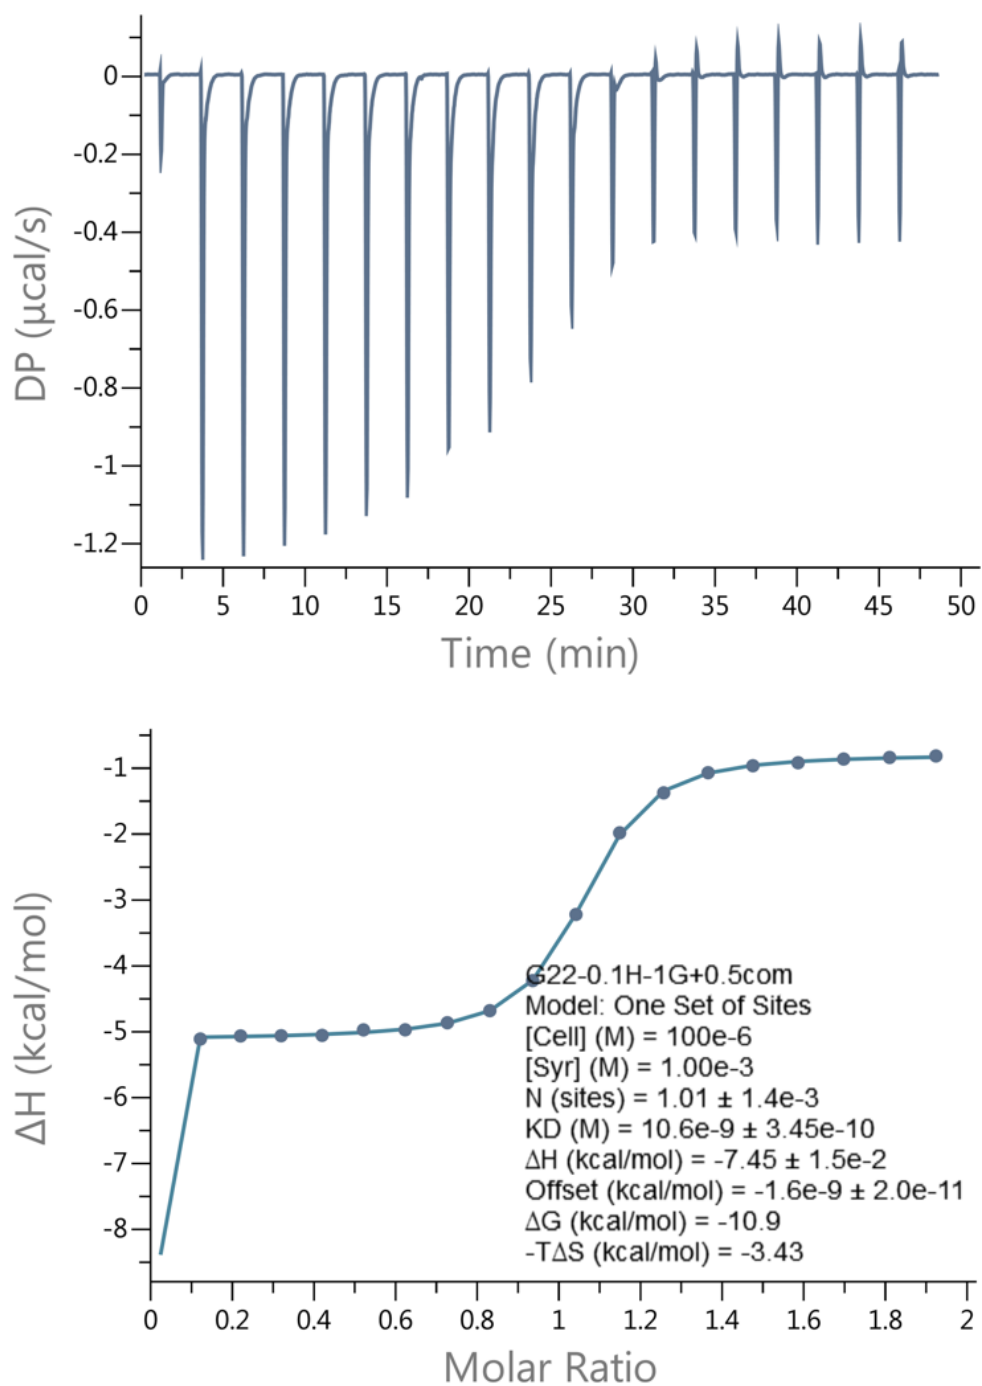

**Figure S31.** Top) Plot of DP vs time from the titration of molecular container **WP6** (100  $\mu\text{M}$ ) and competitive guest **G7** (500  $\mu\text{M}$ ) in the cell with guest **G12** (1.00 mM) in  $1\times$  PBS buffer solution; Bottom) plot of the  $\Delta H$  as a function of molar ratio. The solid line represents the best non-linear fit of the data to a 1:1 binding model ( $K_a = (9.43 \pm 0.31) \times 10^7 \text{ M}^{-1}$ ,  $\Delta H = -7.45 \pm 0.02 \text{ kcal/mol}$ ,  $-T\Delta S = -3.43 \text{ kcal/mol}$ ).

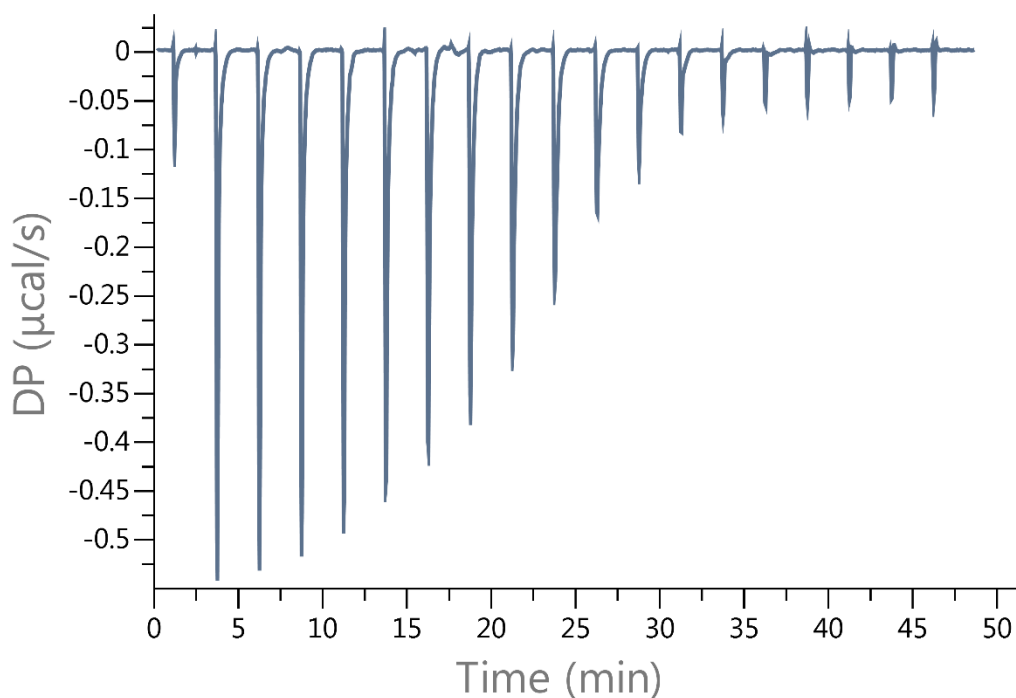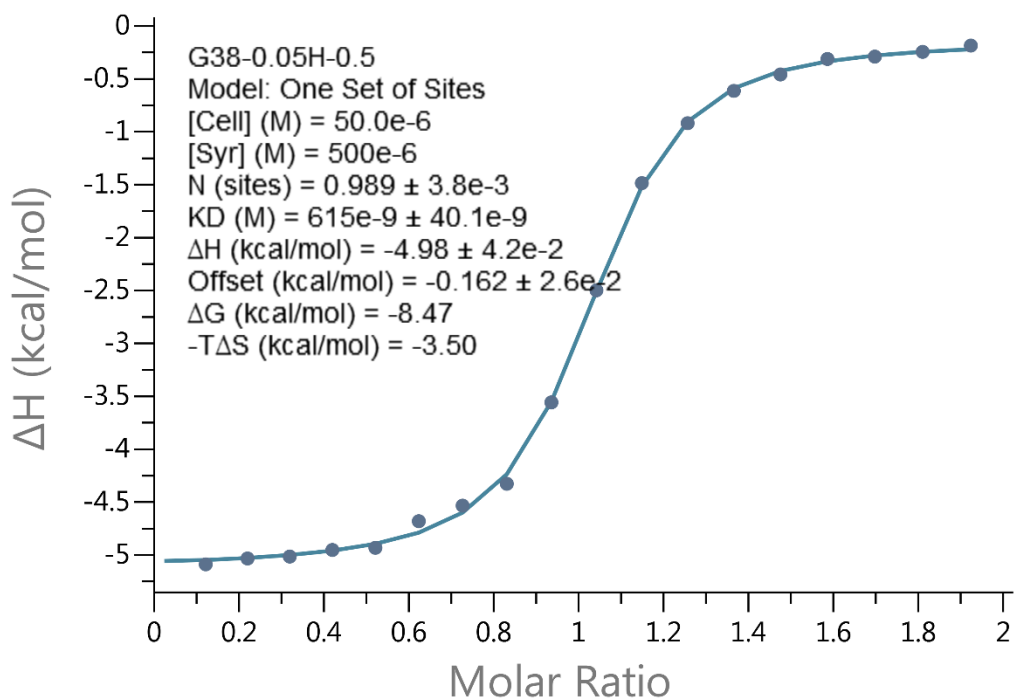

**Figure S32.** Top) Plot of DP vs time from the titration of molecular container **WP6** (50 μM) in the cell with guest **G13** (0.50 mM) in 1× PBS buffer solution; Bottom) plot of the ΔH as a function of molar ratio. The solid line represents the best non-linear fit of the data to a 1:1 binding model ( $K_a = (1.63 \pm 0.11) \times 10^6 \text{ M}^{-1}$ ,  $\Delta H = -4.98 \pm 0.04 \text{ kcal/mol}$ ,  $-T\Delta S = -3.50 \text{ kcal/mol}$ ).

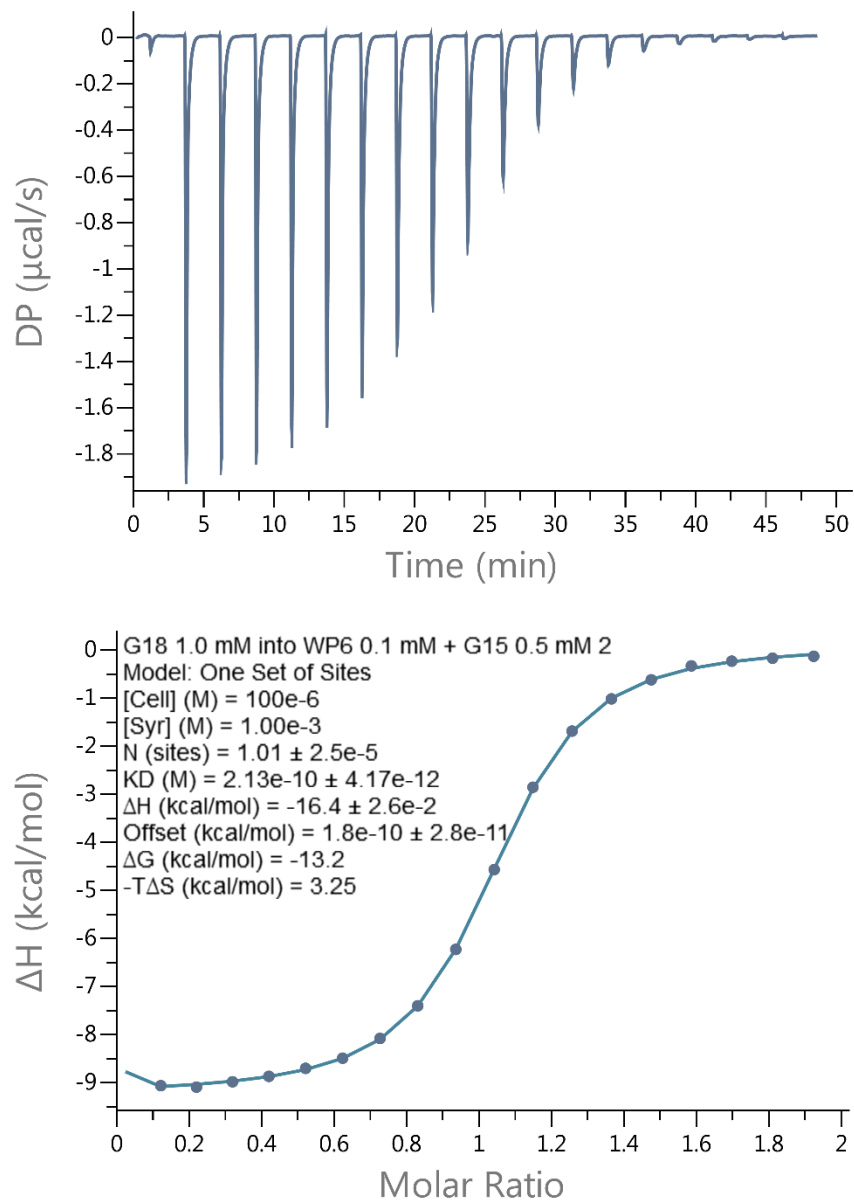

**Figure S33.** Top) Plot of DP vs time from the titration of molecular container **WP6** ( $100 \mu\text{M}$ ) and competitive guest **G15** ( $500 \mu\text{M}$ ) in the cell with guest **G14** ( $1.00 \text{mM}$ ) in  $1\times$  PBS buffer solution; Bottom) plot of the  $\Delta H$  as a function of molar ratio. The solid line represents the best non-linear fit of the data to a competition binding model ( $K_a = (4.69 \pm 0.09) \times 10^9 \text{M}^{-1}$ ,  $\Delta H = -16.4 \pm 0.02 \text{kcal/mol}$ ,  $-T\Delta S = 3.25 \text{kcal/mol}$ ).

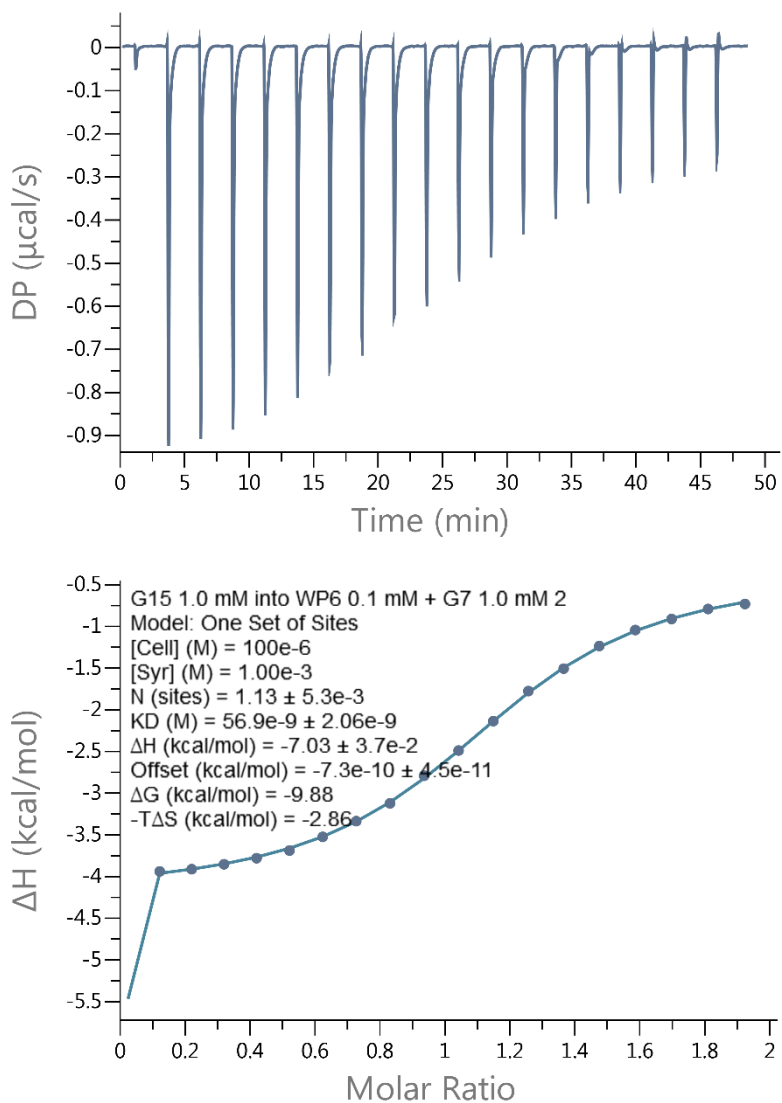

**Figure S34.** Top) Plot of DP vs time from the titration of molecular container **WP6** (100  $\mu\text{M}$ ) and competitive guest **G7** (1.00 mM) in the cell with guest **G15** (1.00 mM) in 1 $\times$  PBS buffer solution; Bottom) plot of the  $\Delta\text{H}$  as a function of molar ratio. The solid line represents the best non-linear fit of the data to a competition binding model ( $K_a = (1.76 \pm 0.06) \times 10^7 \text{ M}^{-1}$ ,  $\Delta\text{H} = -7.03 \pm 0.03 \text{ kcal kcal/mol}$ ,  $-T\Delta\text{S} = -2.86 \text{ kcal/mol}$ ).

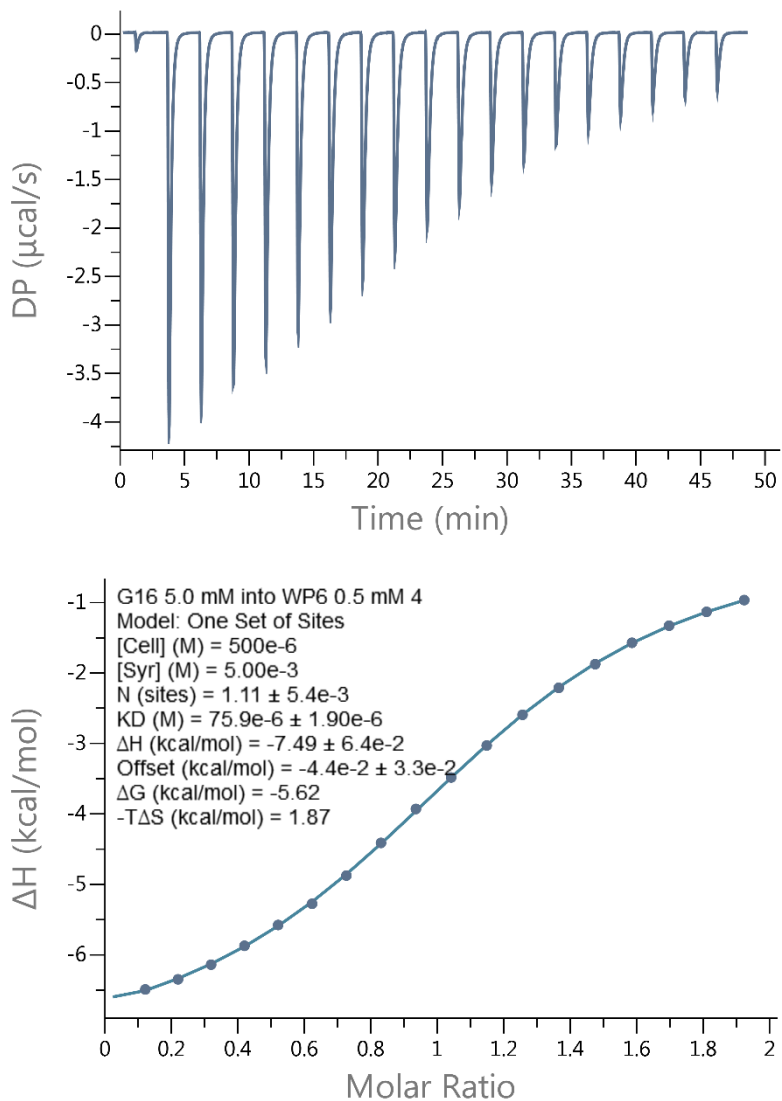

**Figure S35.** Top) Plot of DP vs time from the titration of molecular container **WP6** ( $500 \mu\text{M}$ ) in the cell with guest **G16** ( $5.00 \text{ mM}$ ) in  $1\times$  PBS buffer solution; Bottom) plot of the  $\Delta H$  as a function of molar ratio. The solid line represents the best non-linear fit of the data to a 1:1 binding model ( $K_a = (1.32 \pm 0.03) \times 10^4 \text{ M}^{-1}$ ,  $\Delta H = -7.49 \pm 0.06 \text{ kcal/mol}$ ,  $-\text{T}\Delta S = 1.87 \text{ kcal/mol}$ ).

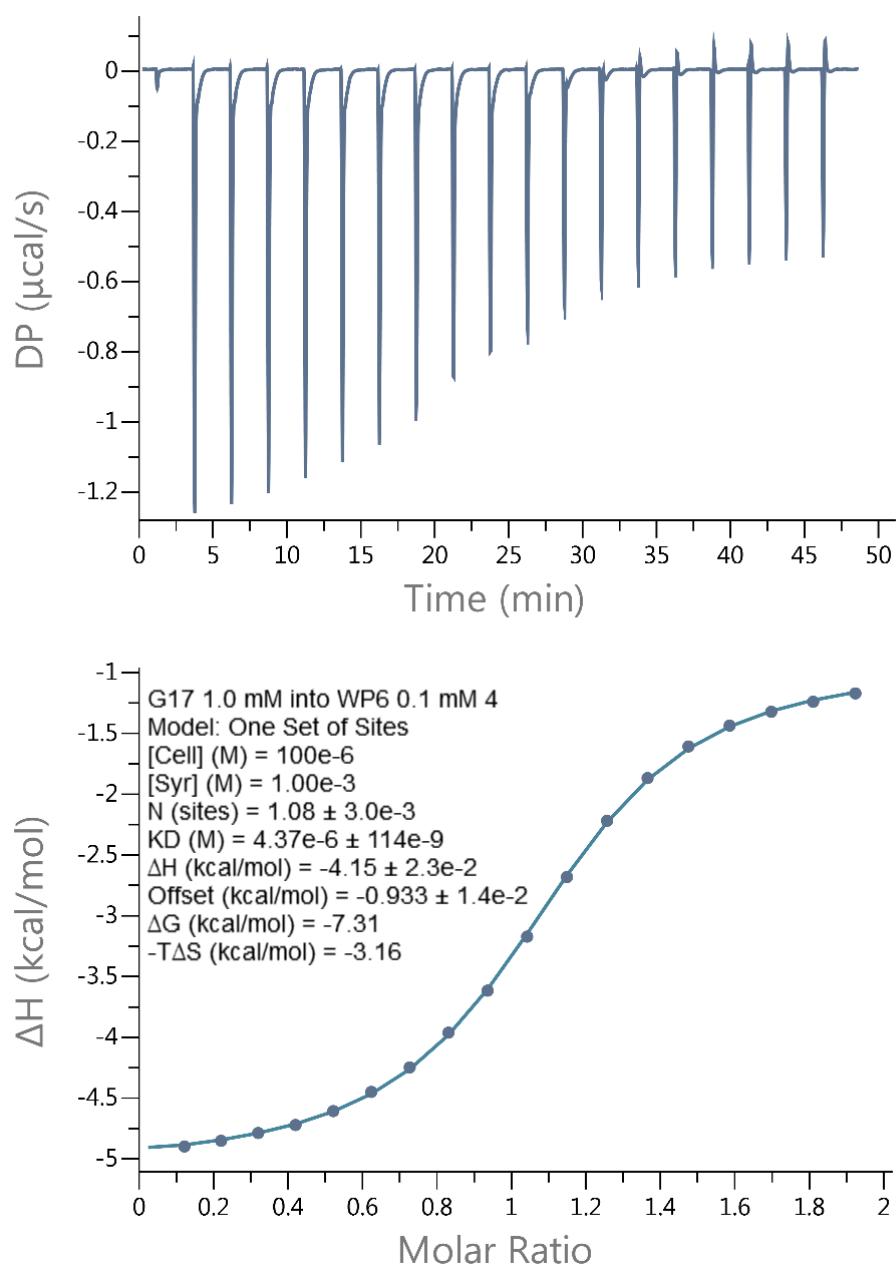

**Figure S36.** Top) Plot of DP vs time from the titration of molecular container **WP6** ( $100\ \mu\text{M}$ ) in the cell with guest **G17** ( $1.00\ \text{mM}$ ) in  $1\times$  PBS buffer solution; Bottom) plot of the  $\Delta H$  as a function of molar ratio. The solid line represents the best non-linear fit of the data to a 1:1 binding model ( $K_a = (2.29 \pm 0.06) \times 10^5\ \text{M}^{-1}$ ,  $\Delta H = -4.15 \pm 0.02\ \text{kcal/mol}$ ,  $-T\Delta S = -3.16\ \text{kcal/mol}$ ).

## X-ray crystal structure of Guest G2

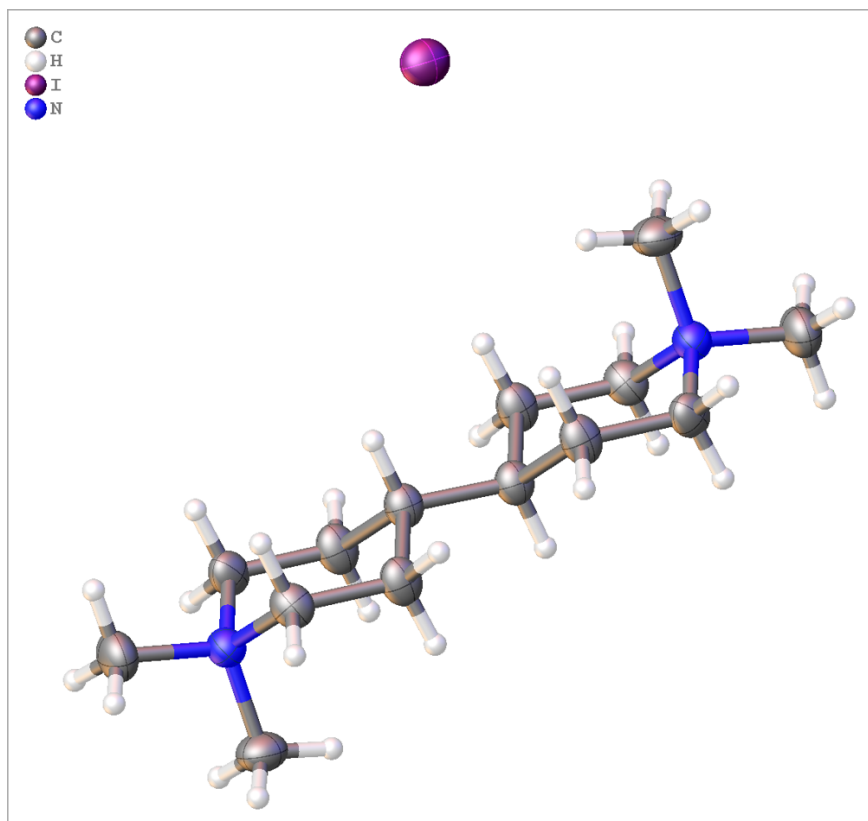

**Table 2 Crystal data and structure refinement for UM3483b.**

|                                    |                                                               |
|------------------------------------|---------------------------------------------------------------|
| Identification code                | UM3483b                                                       |
| Empirical formula                  | C <sub>14</sub> H <sub>30</sub> N <sub>2</sub> I <sub>2</sub> |
| Formula weight                     | 480.20                                                        |
| Temperature/K                      | 296(2)                                                        |
| Crystal system                     | monoclinic                                                    |
| Space group                        | P2 <sub>1</sub> /c                                            |
| a/Å                                | 6.5208(2)                                                     |
| b/Å                                | 14.5116(5)                                                    |
| c/Å                                | 10.1283(3)                                                    |
| α/°                                | 90                                                            |
| β/°                                | 104.2182(5)                                                   |
| γ/°                                | 90                                                            |
| Volume/Å <sup>3</sup>              | 929.05(5)                                                     |
| Z                                  | 2                                                             |
| ρ <sub>calc</sub> /cm <sup>3</sup> | 1.717                                                         |
| μ/mm <sup>-1</sup>                 | 3.375                                                         |



|                                                  |                                                                      |
|--------------------------------------------------|----------------------------------------------------------------------|
| F(000)                                           | 468.0                                                                |
| Crystal size/mm <sup>3</sup>                     | 0.5 × 0.42 × 0.25                                                    |
| Radiation                                        | MoK $\alpha$ ( $\lambda$ = 0.71073)                                  |
| 2 $\theta$ range for data collection/ $^{\circ}$ | 5.01 to 62.496                                                       |
| Index ranges                                     | -9 $\leq$ h $\leq$ 9, -21 $\leq$ k $\leq$ 21, -14 $\leq$ l $\leq$ 14 |
| Reflections collected                            | 16743                                                                |
| Independent reflections                          | 3037 [R <sub>int</sub> = 0.0262, R <sub>sigma</sub> = 0.0147]        |
| Data/restraints/parameters                       | 3037/0/85                                                            |
| Goodness-of-fit on F <sup>2</sup>                | 1.056                                                                |
| Final R indexes [I $\geq$ 2 $\sigma$ (I)]        | R <sub>1</sub> = 0.0240, wR <sub>2</sub> = 0.0539                    |
| Final R indexes [all data]                       | R <sub>1</sub> = 0.0268, wR <sub>2</sub> = 0.0553                    |
| Largest diff. peak/hole / e $\text{\AA}^{-3}$    | 1.21/-1.10                                                           |

**Table 3 Fractional Atomic Coordinates and Equivalent Isotropic Displacement Parameters ( $\text{\AA}^2 \times 10^3$ ) for UM3483b.  $U_{eq}$  is defined as 1/3 of of the trace of the orthogonalised  $U_{ij}$  tensor.**

| Atom | x           | y            | z            | U(eq)     |
|------|-------------|--------------|--------------|-----------|
| I1   | 0.89162 (2) | 0.84473 (2)  | 0.65652 (2)  | 41.48 (7) |
| N1   | 0.3572 (3)  | 0.62374 (12) | 0.78449 (17) | 31.3 (3)  |
| C5   | 0.2873 (3)  | 0.58592 (16) | 0.5339 (2)   | 36.8 (4)  |
| C7   | 0.2493 (4)  | 0.62752 (19) | 0.8995 (2)   | 45.5 (5)  |
| C4   | 0.4501 (3)  | 0.50783 (14) | 0.56055 (19) | 30.8 (4)  |
| C6   | 0.1928 (3)  | 0.60279 (16) | 0.6546 (2)   | 35.1 (4)  |
| C3   | 0.6173 (3)  | 0.52955 (16) | 0.6923 (2)   | 35.9 (4)  |
| C2   | 0.5197 (3)  | 0.54706 (15) | 0.8118 (2)   | 34.7 (4)  |
| C8   | 0.4610 (4)  | 0.71506 (16) | 0.7770 (3)   | 43.7 (5)  |

**Table 4 Anisotropic Displacement Parameters ( $\text{\AA}^2 \times 10^3$ ) for UM3483b. The Anisotropic displacement factor exponent takes the form: -  $2\pi^2[h^2a^{*2}U_{11}+2hka^*b^*U_{12}+...]$ .**

| Atom | U <sub>11</sub> | U <sub>22</sub> | U <sub>33</sub> | U <sub>23</sub> | U <sub>13</sub> | U <sub>12</sub> |
|------|-----------------|-----------------|-----------------|-----------------|-----------------|-----------------|
| I1   | 35.53 (9)       | 38.62 (9)       | 47.78 (10)      | 3.20 (6)        | 5.46 (6)        | 4.13 (5)        |
| N1   | 32.0 (8)        | 31.1 (8)        | 32.2 (8)        | -1.2 (6)        | 10.8 (6)        | 0.0 (6)         |
| C5   | 31.6 (9)        | 45.3 (11)       | 31.5 (9)        | 0.6 (8)         | 4.0 (7)         | 11.7 (8)        |
| C7   | 51.8 (13)       | 50.6 (13)       | 40.3 (11)       | -4.8 (10)       | 23.4 (10)       | 2.3 (11)        |

**Table 4 Anisotropic Displacement Parameters ( $\text{\AA}^2 \times 10^3$ ) for UM3483b. The Anisotropic displacement factor exponent takes the form: -  $2\pi^2[h^2a^2U_{11}+2hka*b*U_{12}+...]$ .**

| Atom | U <sub>11</sub> | U <sub>22</sub> | U <sub>33</sub> | U <sub>23</sub> | U <sub>13</sub> | U <sub>12</sub> |
|------|-----------------|-----------------|-----------------|-----------------|-----------------|-----------------|
| C4   | 27.6(8)         | 35.6(9)         | 28.4(8)         | 1.1(7)          | 5.5(6)          | 6.0(7)          |
| C6   | 25.9(8)         | 40.6(11)        | 37.6(10)        | -4.4(8)         | 5.9(7)          | 4.0(7)          |
| C3   | 29.5(8)         | 45.2(11)        | 30.6(9)         | 0.0(8)          | 3.2(7)          | 9.8(8)          |
| C2   | 36.8(9)         | 36.3(10)        | 29.5(8)         | 2.3(7)          | 5.4(7)          | 5.9(8)          |
| C8   | 44.6(11)        | 31.9(10)        | 54.3(13)        | -2.6(9)         | 11.5(10)        | -6.5(9)         |

**Table 5 Bond Lengths for UM3483b.**

| Atom | Atom | Length/ $\text{\AA}$ | Atom | Atom            | Length/ $\text{\AA}$ |
|------|------|----------------------|------|-----------------|----------------------|
| N1   | C7   | 1.502(3)             | C5   | C6              | 1.518(3)             |
| N1   | C6   | 1.510(3)             | C4   | C4 <sup>1</sup> | 1.540(4)             |
| N1   | C2   | 1.514(3)             | C4   | C3              | 1.534(3)             |
| N1   | C8   | 1.498(3)             | C3   | C2              | 1.520(3)             |
| C5   | C4   | 1.531(3)             |      |                 |                      |

<sup>1</sup>1-X,1-Y,1-Z

**Table 6 Bond Angles for UM3483b.**

| Atom | Atom | Atom | Angle/ $^\circ$ | Atom | Atom | Atom            | Angle/ $^\circ$ |
|------|------|------|-----------------|------|------|-----------------|-----------------|
| C7   | N1   | C6   | 108.35(17)      | C5   | C4   | C4 <sup>1</sup> | 112.3(2)        |
| C7   | N1   | C2   | 108.99(17)      | C5   | C4   | C3              | 108.36(17)      |
| C6   | N1   | C2   | 109.04(15)      | C3   | C4   | C4 <sup>1</sup> | 112.01(19)      |
| C8   | N1   | C7   | 108.08(18)      | N1   | C6   | C5              | 113.08(16)      |
| C8   | N1   | C6   | 111.52(17)      | C2   | C3   | C4              | 112.33(16)      |
| C8   | N1   | C2   | 110.78(17)      | N1   | C2   | C3              | 112.87(16)      |
| C6   | C5   | C4   | 112.24(17)      |      |      |                 |                 |

<sup>1</sup>1-X,1-Y,1-Z

**Table 7 Torsion Angles for UM3483b.**

| A               | B  | C  | D  | Angle/°    | A  | B  | C  | D               | Angle/°   |
|-----------------|----|----|----|------------|----|----|----|-----------------|-----------|
| C5              | C4 | C3 | C2 | 54.4(2)    | C6 | N1 | C2 | C3              | 54.4(2)   |
| C7              | N1 | C6 | C5 | 173.10(19) | C6 | C5 | C4 | C4 <sup>1</sup> | -178.7(2) |
| C7              | N1 | C2 | C3 | 172.50(19) | C6 | C5 | C4 | C3              | -54.4(2)  |
| C4              | C5 | C6 | N1 | 56.8(3)    | C2 | N1 | C6 | C5              | -54.6(2)  |
| C4 <sup>1</sup> | C4 | C3 | C2 | 178.8(2)   | C8 | N1 | C6 | C5              | 68.1(2)   |
| C4              | C3 | C2 | N1 | -56.5(2)   | C8 | N1 | C2 | C3              | -68.7(2)  |

<sup>1</sup>-X,1-Y,1-Z**Table 8 Hydrogen Atom Coordinates and Isotropic Displacement Parameters (Å<sup>2</sup>×10<sup>3</sup>) for UM3483b.**

| Atom | x        | y        | z        | U(eq) |
|------|----------|----------|----------|-------|
| H5A  | 0.354643 | 0.642013 | 0.513777 | 44    |
| H5B  | 0.174816 | 0.570692 | 0.454736 | 44    |
| H7A  | 0.351673 | 0.641049 | 0.982935 | 68    |
| H7B  | 0.184176 | 0.569127 | 0.907349 | 68    |
| H7C  | 0.143122 | 0.674812 | 0.88157  | 68    |
| H4   | 0.377433 | 0.451004 | 0.575005 | 37    |
| H6A  | 0.094589 | 0.65402  | 0.633755 | 42    |
| H6B  | 0.113437 | 0.548681 | 0.668738 | 42    |
| H3A  | 0.71519  | 0.478275 | 0.714159 | 43    |
| H3B  | 0.696889 | 0.583517 | 0.678045 | 43    |
| H2A  | 0.452852 | 0.490879 | 0.832057 | 42    |
| H2B  | 0.631034 | 0.562805 | 0.891279 | 42    |
| H8A  | 0.533161 | 0.713791 | 0.705011 | 66    |
| H8B  | 0.560896 | 0.727283 | 0.861987 | 66    |
| H8C  | 0.355417 | 0.762601 | 0.759129 | 66    |

**Experimental:**

A suitable single crystals of C<sub>14</sub>H<sub>30</sub>N<sub>2</sub>I<sub>2</sub> (**UM3483b**) was selected and measured on a Bruker Smart Apex II CCD diffractometer [1]. The crystal was kept at 296(2) K during data collection. The integral intensity were correct for absorption using SADABS software [2] using multi-scan method. Resulting minimum and maximum transmission are 0.303 and 0.430 respectively. The structure was solved with the ShelXT (Sheldrick, 2015a) [3] program

and refined with the ShelXL (Sheldrick, 2015c) [4] program and least-square minimisation using ShelX software package [4]. Number of restraints used = 0.

#### **Crystal structure determination:**

*Crystal Data* for  $C_{14}H_{30}N_2I_2$  ( $M = 480.20$  g/mol): monoclinic, space group  $P2_1/c$  (no. 14),  $a = 6.5208(2)$  Å,  $b = 14.5116(5)$  Å,  $c = 10.1283(3)$  Å,  $\beta = 104.2182(5)^\circ$ ,  $V = 929.05(5)$  Å<sup>3</sup>,  $Z = 2$ ,  $T = 296(2)$  K,  $\mu(\text{MoK}\alpha) = 3.375$  mm<sup>-1</sup>,  $D_{\text{calc}} = 1.717$  g/cm<sup>3</sup>, 16743 reflections measured ( $5.01^\circ \leq 2\theta \leq 62.496^\circ$ ), 3037 unique ( $R_{\text{int}} = 0.0262$ ,  $R_{\text{sig}} = 0.0147$ ) which were used in all calculations. The final  $R_1$  was 0.0240 ( $I > 2\sigma(I)$ ) and  $wR_2$  was 0.0553 (all data).

*Refinement details:* H atoms were positioned from the geometric considerations and refined as riding on the attached atoms with Uiso constrained to be 20% (50% for methyl group) larger than Ueqv of the attached group. Orientation of methyl groups was optimized.

#### **References:**

1. Bruker (2010). Apex2. Bruker AXS Inc., Madison, Wisconsin, USA.
2. Krause, L., Herbst-Irmer, R., Sheldrick, G.M., Stalke, D. (2015). J. Appl. Cryst. 48, 3-10.
3. Sheldrick, G. M. (2015a). Acta Cryst. A17, 3-8.
4. Sheldrick, G. M. (2015c). Acta Cryst. C17, 3-8.
5. Dolomanov, O.V., Bourhis, L.J., Gildea, R.J, Howard, J.A.K. & Puschmann, H. (2009), J. Appl. Cryst. 42, 339-341.

This report has been created with Olex2 [5], compiled on 2020.11.12 svn.r5f609507 for OlexSys.

### XYZ coordinates of the MMFF minimized geometry for WP6•G5 and WP6•G14

For WP6•G5:

|   |           |           |           |
|---|-----------|-----------|-----------|
| C | 4.613741  | -1.486469 | 1.517660  |
| C | 5.356010  | 1.211475  | 1.394940  |
| C | 4.508175  | -0.715523 | 2.682884  |
| C | 4.894041  | -0.874472 | 0.278088  |
| C | 5.268293  | 0.483377  | 0.194200  |
| C | 4.887626  | 0.641054  | 2.598415  |
| C | 4.173890  | -1.326546 | 4.036116  |
| C | 5.608623  | -3.566422 | 1.053533  |
| C | 6.747572  | 2.785115  | 2.509990  |
| C | 6.126795  | -4.696860 | 1.976251  |
| C | 7.854326  | 3.819422  | 2.183141  |
| C | 0.944891  | -3.343133 | 4.645195  |
| C | 1.834870  | -0.694782 | 4.891196  |
| C | 0.023842  | -2.358915 | 5.037545  |
| C | 2.245457  | -2.969172 | 4.237733  |
| C | 2.717275  | -1.639052 | 4.352894  |
| C | 0.501933  | -1.043693 | 5.177801  |
| C | -1.415415 | -2.672753 | 5.424830  |
| C | 1.541042  | -5.579669 | 5.194493  |
| C | 2.466766  | 0.743559  | 6.592805  |
| C | 0.907101  | -6.737752 | 6.008798  |
| C | 2.711528  | 2.216340  | 7.003557  |
| C | -3.950922 | -2.659615 | 2.531931  |
| C | -3.204736 | -0.990966 | 4.653958  |
| C | -4.521356 | -1.380425 | 2.610845  |
| C | -2.884816 | -3.012954 | 3.384874  |
| C | -2.496183 | -2.188101 | 4.462861  |
| C | -4.135490 | -0.558061 | 3.688445  |
| C | -5.622622 | -0.912562 | 1.670853  |
| C | -4.699875 | -4.876588 | 2.198875  |
| C | -4.186535 | 0.182520  | 6.452935  |
| C | -6.020989 | -5.522296 | 1.714671  |
| C | -3.905485 | 0.694674  | 7.884582  |
| C | -5.033595 | -0.286642 | -2.078713 |
| C | -4.898378 | 1.153334  | 0.327056  |
| C | -4.582806 | 1.046543  | -2.112013 |
| C | -5.252453 | -0.922639 | -0.837346 |
| C | -5.202863 | -0.214644 | 0.382868  |

|   |           |           |           |
|---|-----------|-----------|-----------|
| C | -4.524044 | 1.753620  | -0.892046 |
| C | -4.283498 | 1.776308  | -3.415300 |
| C | -6.410744 | -1.819157 | -3.277043 |
| C | -5.920219 | 3.009697  | 1.313279  |
| C | -7.082562 | -1.917831 | -4.671195 |
| C | -6.488454 | 3.477026  | 2.671994  |
| C | -0.723950 | 1.348322  | -4.814933 |
| C | -2.224498 | 3.309237  | -3.483426 |
| C | -0.078333 | 2.528429  | -4.414601 |
| C | -2.044683 | 1.083544  | -4.391650 |
| C | -2.817776 | 2.059080  | -3.724868 |
| C | -0.853210 | 3.504445  | -3.751072 |
| C | 1.366694  | 2.839444  | -4.783643 |
| C | -0.860467 | 0.003465  | -6.755641 |
| C | -2.826310 | 5.586499  | -3.685499 |
| C | -0.042650 | -0.174974 | -8.058851 |
| C | -4.085819 | 6.486676  | -3.611743 |
| C | 4.177709  | 0.728001  | -3.209453 |
| C | 2.948131  | 3.223876  | -2.793059 |
| C | 4.558504  | 1.489774  | -2.090999 |
| C | 3.083074  | 1.139196  | -4.000396 |
| C | 2.453357  | 2.391126  | -3.810624 |
| C | 3.934125  | 2.742959  | -1.906121 |
| C | 5.684207  | 1.066215  | -1.153251 |
| C | 5.157609  | -0.600229 | -4.917145 |
| C | 3.471137  | 5.504415  | -2.428748 |
| C | 6.518341  | -1.296209 | -5.177604 |
| C | 3.061073  | 6.903296  | -2.945996 |
| C | 1.016173  | 4.776400  | 0.914197  |
| C | 1.599092  | 2.356361  | 1.265056  |
| C | -0.503873 | 2.981671  | 0.028425  |
| C | 0.131156  | 1.933665  | 0.983460  |
| C | -0.450890 | 4.400793  | 0.643999  |
| C | 1.664379  | 3.771599  | 1.882221  |
| C | 0.875593  | 3.776067  | 3.204967  |
| C | -1.230230 | 4.391106  | 1.977300  |
| C | -0.646208 | 1.964031  | 2.334506  |
| C | -0.607693 | 3.383687  | 2.977763  |
| C | 3.116962  | 4.178060  | 2.148015  |
| C | -1.076740 | 5.423462  | -0.309363 |
| C | 0.997177  | 0.359604  | -0.905580 |

|   |           |           |           |
|---|-----------|-----------|-----------|
| C | -1.330769 | 0.082363  | -0.137723 |
| C | 0.542223  | -0.627232 | 1.311234  |
| C | -2.931821 | 3.373562  | 4.158601  |
| C | -1.053549 | 2.225897  | 5.244241  |
| C | -1.093971 | 4.650914  | 5.194135  |
| H | 4.899517  | -1.480926 | -0.626901 |
| H | 4.871516  | 1.239559  | 3.506525  |
| H | 4.560418  | -0.671621 | 4.828885  |
| H | 4.771116  | -2.239833 | 4.159790  |
| H | 6.469502  | -2.910451 | 0.865856  |
| H | 5.274226  | -3.986832 | 0.098392  |
| H | 6.095494  | 3.208386  | 3.283607  |
| H | 7.241750  | 1.889029  | 2.906030  |
| H | 2.932104  | -3.731254 | 3.868438  |
| H | -0.164066 | -0.295451 | 5.591820  |
| H | -1.596998 | -2.261276 | 6.426783  |
| H | -1.548258 | -3.752916 | 5.565515  |
| H | 2.262812  | -5.078405 | 5.854478  |
| H | 2.074725  | -5.991530 | 4.331041  |
| H | 1.590744  | 0.406241  | 7.160451  |
| H | 3.334787  | 0.137745  | 6.883279  |
| H | -2.392021 | -3.974671 | 3.256520  |
| H | -4.618011 | 0.410933  | 3.794720  |
| H | -6.300884 | -0.244904 | 2.220463  |
| H | -6.266975 | -1.767142 | 1.424281  |
| H | -4.759139 | -4.851804 | 3.295760  |
| H | -3.849456 | -5.500824 | 1.903985  |
| H | -4.615688 | 1.022236  | 5.894878  |
| H | -4.913967 | -0.638485 | 6.499397  |
| H | -5.527077 | -1.976289 | -0.812014 |
| H | -4.241910 | 2.806158  | -0.909675 |
| H | -4.854061 | 2.714702  | -3.415567 |
| H | -4.706929 | 1.228113  | -4.266114 |
| H | -7.183037 | -1.485888 | -2.571596 |
| H | -6.054885 | -2.811436 | -2.978888 |
| H | -5.384130 | 3.855494  | 0.868258  |
| H | -2.509648 | 0.132422  | -4.643902 |
| H | -0.383556 | 4.450957  | -3.489779 |
| H | 1.463838  | 3.919937  | -4.955417 |
| H | 1.584668  | 2.415856  | -5.774147 |
| H | -1.678034 | 0.696975  | -6.996586 |

|   |           |           |           |
|---|-----------|-----------|-----------|
| H | -1.288378 | -0.959689 | -6.453679 |
| H | -1.999882 | 6.122606  | -3.204702 |
| H | -2.581653 | 5.423864  | -4.743670 |
| H | 2.743043  | 0.506907  | -4.819007 |
| H | 4.268201  | 3.365569  | -1.078297 |
| H | 6.342722  | 1.932585  | -1.003682 |
| H | 6.338253  | 0.337167  | -1.649166 |
| H | 5.171633  | 0.352619  | -5.462082 |
| H | 4.350508  | -1.226850 | -5.315874 |
| H | 3.614359  | 5.562541  | -1.343002 |
| H | 4.424474  | 5.238914  | -2.903188 |
| H | 2.185212  | 2.360406  | 0.342097  |
| H | 0.020846  | 2.997968  | -0.932204 |
| H | 1.575163  | 4.799421  | -0.029808 |
| H | 2.081161  | 1.650699  | 1.949760  |
| H | -1.550607 | 2.735534  | -0.178055 |
| H | 0.952674  | 4.780561  | 3.639707  |
| H | 1.355995  | 3.085484  | 3.905415  |
| H | -1.237358 | 5.403296  | 2.398805  |
| H | -2.272548 | 4.128993  | 1.759275  |
| H | -0.184435 | 1.248323  | 3.019634  |
| H | -1.683836 | 1.654637  | 2.182841  |
| H | 3.175512  | 5.186933  | 2.570818  |
| H | 3.706000  | 4.172030  | 1.225041  |
| H | 3.591658  | 3.494740  | 2.860657  |
| H | -1.059117 | 6.430595  | 0.122718  |
| H | -2.121367 | 5.173581  | -0.524930 |
| H | -0.531023 | 5.462994  | -1.256866 |
| H | 0.720356  | 1.131599  | -1.621423 |
| H | 0.847278  | -0.627440 | -1.355592 |
| H | 2.036068  | 0.450830  | -0.584907 |
| H | -1.618023 | 0.735856  | -0.962790 |
| H | -2.017371 | 0.162899  | 0.704074  |
| H | -1.305026 | -0.953820 | -0.491529 |
| H | 1.534386  | -0.378484 | 1.684498  |
| H | 0.580157  | -1.578308 | 0.769984  |
| H | -0.187893 | -0.704471 | 2.119461  |
| H | -3.235097 | 4.326283  | 3.720644  |
| H | -3.400477 | 3.251472  | 5.140166  |
| H | -3.175738 | 2.529623  | 3.512349  |
| H | 0.025574  | 2.144806  | 5.317907  |



|   |           |           |           |
|---|-----------|-----------|-----------|
| H | -1.472932 | 1.337626  | 4.778644  |
| H | -1.488040 | 2.378825  | 6.233879  |
| H | -1.264304 | 5.545796  | 4.590816  |
| H | -0.061680 | 4.606870  | 5.545466  |
| H | -1.765549 | 4.664791  | 6.059951  |
| H | -6.756699 | 2.724356  | 0.661430  |
| H | 1.071726  | 5.790768  | 1.330850  |
| N | 0.082940  | 0.471207  | 0.333357  |
| N | -1.402667 | 3.420434  | 4.351705  |
| O | 4.484333  | -2.852874 | 1.634449  |
| O | 5.942346  | 2.462534  | 1.346787  |
| O | 6.434560  | -4.378811 | 3.165083  |
| O | 9.016020  | 3.348146  | 1.965759  |
| O | 6.285037  | -5.830067 | 1.420182  |
| O | 7.533519  | 5.044022  | 2.275081  |
| O | 0.531971  | -4.657658 | 4.711508  |
| O | 2.250013  | 0.592486  | 5.162658  |
| O | 0.634807  | -7.800858 | 5.370004  |
| O | 1.927042  | 3.089524  | 6.525744  |
| O | 0.805254  | -6.554304 | 7.263441  |
| O | 3.636485  | 2.390411  | 7.859696  |
| O | -4.500853 | -3.553187 | 1.635828  |
| O | -2.968385 | -0.266902 | 5.804865  |
| O | -5.901051 | -6.602812 | 1.054920  |
| O | -3.201130 | 1.746333  | 7.974919  |
| O | -7.099924 | -4.983444 | 2.109967  |
| O | -4.471980 | 0.058507  | 8.827239  |
| O | -5.281377 | -0.907917 | -3.286848 |
| O | -4.993935 | 1.902082  | 1.480745  |
| O | -6.704564 | -2.874652 | -5.416073 |
| O | -5.639909 | 3.819821  | 3.550401  |
| O | -8.029159 | -1.100501 | -4.899309 |
| O | -7.754147 | 3.533828  | 2.757912  |
| O | -0.042541 | 0.498082  | -5.662809 |
| O | -3.029478 | 4.321577  | -3.003650 |
| O | 0.131484  | -1.373215 | -8.447287 |
| O | -4.369638 | 6.984991  | -2.480955 |
| O | 0.282364  | 0.884720  | -8.677400 |
| O | -4.670111 | 6.717170  | -4.719708 |
| O | 4.922332  | -0.395706 | -3.500153 |
| O | 2.453799  | 4.509918  | -2.715830 |

|   |          |           |           |
|---|----------|-----------|-----------|
| O | 6.499885 | -2.562681 | -5.264265 |
| O | 2.404203 | 7.630568  | -2.139277 |
| O | 7.512181 | -0.531028 | -5.385173 |
| O | 3.507769 | 7.232190  | -4.089973 |

**For WP6•G14:**

|   |           |           |           |
|---|-----------|-----------|-----------|
| C | 5.235928  | 0.575886  | -1.727748 |
| C | 5.236612  | -1.683653 | -0.061105 |
| C | 4.923802  | -0.671349 | -2.292540 |
| C | 5.304969  | 0.703000  | -0.324183 |
| C | 5.289519  | -0.417832 | 0.537452  |
| C | 4.950658  | -1.797711 | -1.439325 |
| H | 5.415782  | 1.690411  | 0.116057  |
| H | 4.786747  | -2.782924 | -1.870072 |
| C | 4.641953  | -0.858624 | -3.783181 |
| H | 5.091177  | -1.814812 | -4.079479 |
| H | 5.194787  | -0.109413 | -4.364733 |
| O | 5.501867  | 1.627081  | -2.586795 |
| O | 5.522954  | -2.781478 | 0.726141  |
| C | 6.514086  | 2.547497  | -2.101429 |
| H | 7.258700  | 2.030206  | -1.481982 |
| H | 6.017065  | 3.318577  | -1.501589 |
| C | 6.382056  | -3.747765 | 0.066553  |
| H | 5.743506  | -4.508262 | -0.397065 |
| H | 7.001396  | -3.278701 | -0.709707 |
| C | 7.311906  | 3.219948  | -3.247981 |
| C | 7.372584  | -4.422916 | 1.047838  |
| O | 8.068037  | 2.474088  | -3.942855 |
| O | 8.246735  | -3.678642 | 1.589342  |
| O | 7.236539  | 4.489302  | -3.307618 |
| O | 7.292313  | -5.690825 | 1.129067  |
| C | 1.099868  | 0.498012  | -4.432609 |
| C | 2.570658  | -1.818067 | -4.999086 |
| C | 0.434239  | -0.555403 | -5.071024 |
| C | 2.421506  | 0.353871  | -3.967505 |
| C | 3.178038  | -0.806024 | -4.224866 |
| C | 1.197750  | -1.714754 | -5.341648 |
| H | 2.879721  | 1.178754  | -3.424643 |
| H | 0.709881  | -2.531908 | -5.867937 |
| C | -0.988450 | -0.430125 | -5.619108 |
| H | -1.141089 | -1.209161 | -6.377558 |

|   |           |           |           |
|---|-----------|-----------|-----------|
| H | -1.038922 | 0.498586  | -6.205879 |
| O | 0.453964  | 1.696421  | -4.251738 |
| O | 3.376614  | -2.861788 | -5.418953 |
| C | 1.047491  | 2.729529  | -5.074434 |
| H | 1.174019  | 2.368062  | -6.102936 |
| H | 2.018484  | 3.025734  | -4.661531 |
| C | 2.954284  | -3.537600 | -6.628141 |
| H | 2.174713  | -4.264988 | -6.373681 |
| H | 2.559323  | -2.818557 | -7.357267 |
| C | 0.152567  | 3.983855  | -5.093167 |
| C | 4.127584  | -4.290031 | -7.308879 |
| O | -0.533038 | 4.208880  | -4.045234 |
| O | 4.355134  | -5.474513 | -6.911485 |
| O | 0.205656  | 4.687395  | -6.147780 |
| O | 4.686214  | -3.694189 | -8.285034 |
| C | -3.671281 | 0.802534  | -3.154788 |
| C | -2.979889 | -1.572715 | -4.445056 |
| C | -4.368757 | -0.354984 | -2.796883 |
| C | -2.557478 | 0.748907  | -4.013985 |
| C | -2.166550 | -0.443489 | -4.651410 |
| C | -4.006814 | -1.543886 | -3.467429 |
| H | -2.014023 | 1.669464  | -4.215602 |
| H | -4.563270 | -2.453571 | -3.247556 |
| C | -5.542484 | -0.337772 | -1.823136 |
| H | -6.202742 | -1.184773 | -2.052566 |
| H | -6.172231 | 0.532021  | -2.056383 |
| O | -4.029787 | 2.017334  | -2.625736 |
| O | -2.765926 | -2.667206 | -5.261103 |
| C | -4.746981 | 2.810011  | -3.601438 |
| H | -5.753378 | 2.394159  | -3.726961 |
| H | -4.230180 | 2.819614  | -4.568783 |
| C | -3.983293 | -3.326734 | -5.694062 |
| H | -4.204366 | -4.136429 | -4.989459 |
| H | -4.833385 | -2.632109 | -5.718906 |
| C | -4.856795 | 4.275400  | -3.130817 |
| C | -3.848670 | -3.904263 | -7.126086 |
| O | -3.972790 | 4.667456  | -2.302942 |
| O | -3.762106 | -5.169321 | -7.217329 |
| O | -5.798400 | 4.948629  | -3.651567 |
| O | -3.951220 | -3.076380 | -8.085034 |
| C | -4.943486 | 0.954866  | 1.765895  |

|   |           |           |           |
|---|-----------|-----------|-----------|
| C | -5.223246 | -1.498747 | 0.439928  |
| C | -4.725552 | -0.225890 | 2.498186  |
| C | -5.102066 | 0.900176  | 0.361351  |
| C | -5.244117 | -0.324238 | -0.327997 |
| C | -4.876018 | -1.451784 | 1.809628  |
| H | -5.185019 | 1.827107  | -0.202215 |
| H | -4.779821 | -2.382475 | 2.366998  |
| C | -4.489096 | -0.228587 | 4.008425  |
| H | -5.005680 | -1.098089 | 4.437605  |
| H | -5.026966 | 0.618006  | 4.456967  |
| O | -5.045954 | 2.139196  | 2.470459  |
| O | -5.581421 | -2.677352 | -0.181932 |
| C | -6.078303 | 3.031441  | 1.971497  |
| H | -6.873654 | 2.480830  | 1.451737  |
| H | -5.613797 | 3.731790  | 1.267859  |
| C | -6.580497 | -3.422257 | 0.562247  |
| H | -6.062185 | -4.187387 | 1.151063  |
| H | -7.150209 | -2.775646 | 1.243102  |
| C | -6.764705 | 3.825888  | 3.111277  |
| C | -7.618103 | -4.092066 | -0.374961 |
| O | -6.349023 | 5.009982  | 3.304531  |
| O | -7.686928 | -5.361265 | -0.314001 |
| O | -7.760770 | 3.266291  | 3.669147  |
| O | -8.375421 | -3.320424 | -1.040523 |
| C | -1.129223 | 1.110319  | 5.359280  |
| C | -2.340550 | -1.374258 | 4.841839  |
| C | -0.352812 | -0.054935 | 5.490280  |
| C | -2.420138 | 1.035538  | 4.787542  |
| C | -3.047525 | -0.203439 | 4.513170  |
| C | -0.983675 | -1.292191 | 5.230400  |
| H | -2.978452 | 1.951653  | 4.602318  |
| H | -0.411649 | -2.204501 | 5.383912  |
| C | 1.090693  | -0.033331 | 6.003066  |
| H | 1.174838  | -0.853768 | 6.727257  |
| H | 1.267752  | 0.872717  | 6.596369  |
| O | -0.585972 | 2.289592  | 5.830058  |
| O | -3.028085 | -2.573048 | 4.803686  |
| C | -1.535170 | 3.175986  | 6.476079  |
| H | -1.933370 | 3.864934  | 5.722566  |
| C | -2.668340 | -3.487314 | 5.871934  |
| H | -1.823660 | -4.098091 | 5.532948  |

|   |           |           |           |
|---|-----------|-----------|-----------|
| H | -2.379298 | -2.943941 | 6.781401  |
| C | -0.871243 | 3.999914  | 7.612321  |
| C | -3.843863 | -4.413583 | 6.273665  |
| O | -0.276312 | 5.070155  | 7.276476  |
| O | -3.689345 | -5.650614 | 6.021052  |
| O | -1.072560 | 3.584584  | 8.798923  |
| O | -4.797744 | -3.882053 | 6.921787  |
| C | 3.294472  | 0.777762  | 2.941628  |
| C | 3.300550  | -1.020619 | 5.110008  |
| C | 4.295589  | -0.201910 | 2.986680  |
| C | 2.251575  | 0.777644  | 3.891281  |
| C | 2.213651  | -0.132143 | 4.969554  |
| C | 4.277040  | -1.092084 | 4.087904  |
| H | 1.448833  | 1.507806  | 3.796906  |
| H | 5.071436  | -1.831951 | 4.150751  |
| C | 5.493288  | -0.222737 | 2.034705  |
| H | 6.210365  | -0.983086 | 2.373455  |
| H | 6.035312  | 0.721123  | 2.192817  |
| O | 3.351545  | 1.699933  | 1.930294  |
| O | 3.371395  | -1.759137 | 6.279155  |
| C | 3.099440  | 3.068373  | 2.312523  |
| H | 3.992149  | 3.636128  | 2.025327  |
| H | 2.964761  | 3.209744  | 3.390904  |
| C | 4.680495  | -2.269146 | 6.632289  |
| H | 4.881794  | -3.170123 | 6.041176  |
| H | 5.454474  | -1.517472 | 6.431127  |
| C | 1.892974  | 3.639221  | 1.553288  |
| C | 4.777788  | -2.639547 | 8.135674  |
| O | 0.942754  | 2.838379  | 1.285000  |
| O | 4.322130  | -3.773243 | 8.480495  |
| O | 1.948101  | 4.869400  | 1.254160  |
| O | 5.414451  | -1.819619 | 8.873613  |
| C | -1.064379 | -2.932358 | 0.849732  |
| C | -0.261082 | -0.696557 | 1.627029  |
| C | -1.529816 | -0.872848 | -0.509474 |
| C | -0.396584 | -0.121620 | 0.205142  |
| C | -1.221348 | -2.377854 | -0.575332 |
| C | 0.073842  | -2.196334 | 1.574081  |
| H | -1.193156 | -0.547799 | 2.182285  |
| H | -2.472720 | -0.710785 | 0.015910  |
| H | -2.001879 | -2.811598 | 1.405613  |

|   |           |           |           |
|---|-----------|-----------|-----------|
| H | 0.520592  | -0.165886 | 2.170871  |
| H | -1.650967 | -0.498550 | -1.527983 |
| H | -2.035320 | -2.901568 | -1.088674 |
| H | 0.183203  | -2.590609 | 2.590057  |
| C | 1.385087  | -2.398086 | 0.796332  |
| H | 1.638550  | -3.464562 | 0.758086  |
| H | 2.208825  | -1.894498 | 1.314609  |
| C | 1.240901  | -1.840701 | -0.629144 |
| H | 2.168297  | -1.996076 | -1.185191 |
| C | 0.926440  | -0.334293 | -0.550525 |
| H | 1.749820  | 0.191297  | -0.051658 |
| H | 0.860121  | 0.071678  | -1.562752 |
| C | 0.094187  | -2.575916 | -1.344998 |
| H | 0.325655  | -3.645274 | -1.422444 |
| H | -0.011676 | -2.198982 | -2.368705 |
| N | -0.712430 | 1.334492  | 0.324105  |
| H | 0.142266  | 1.831602  | 0.714939  |
| H | -1.376827 | 1.481906  | 1.094018  |
| C | -1.168651 | 2.096500  | -0.880953 |
| H | -0.643938 | 1.707373  | -1.755174 |
| H | -2.235379 | 1.892804  | -0.961195 |
| C | -0.921329 | 3.610916  | -0.751399 |
| H | -1.324094 | 4.002233  | 0.187402  |
| H | 0.143938  | 3.840516  | -0.824799 |
| N | -1.560737 | 4.373464  | -1.830717 |
| H | -1.189874 | 4.143144  | -2.792558 |
| H | -1.385943 | 5.372500  | -1.768547 |
| H | -2.608223 | 4.308478  | -1.922584 |
| H | -2.366718 | 2.614713  | 6.921988  |
| H | -0.852474 | -4.007864 | 0.813023  |

## Platinum Standard pK<sub>a</sub> Report

### Customer Details

|                      |                                            |
|----------------------|--------------------------------------------|
| Name:                | Lyle Isaacs                                |
| Company/Institution: | University of Maryland                     |
| Email Address:       | Lisaacs@umd.edu                            |
| Telephone Number:    | 301-405-1884 (office); 240-498-2004 (cell) |
| Purchase Order No.:  | 99955                                      |
| Project No.:         | P210127                                    |
| Laboratory Notebook: | RR003-061                                  |

### Contents

|                                                                   |   |
|-------------------------------------------------------------------|---|
| Customer Details .....                                            | 1 |
| Contents .....                                                    | 1 |
| Summary.....                                                      | 2 |
| Introduction.....                                                 | 3 |
| Experimental Procedure .....                                      | 3 |
| Platinum Standard pK <sub>a</sub> : Results and Discussions ..... | 3 |
| Instrument Calibration .....                                      | 5 |
| Quality Control Checks .....                                      | 5 |
| Results Printouts.....                                            | 5 |
| General pK <sub>a</sub> Platinum Standard Procedure .....         | 6 |

**Prepared by:** Rebeca Ruiz (Global Analytical Services Manager)

**Date:** 24<sup>th</sup> September 2021

**Reviewed by:** Imogen Anastasiou (Biopharmaceutical Product Specialist)

**Date:** 27<sup>th</sup> September 2021

Note: While taking care to do work of the highest quality and making the best effort to report reliable results based on the information provided by the client and applying our latest knowledge of the techniques involved, it is a condition of PION's acceptance of this order that the total liability of PION INC. under this contract is limited to the value of the purchase order. Please let us know if these results are to be published in the technical literature.

## Summary

**Table 1 – Platinum Standard pK<sub>a</sub> Results**

| Pion No. | Compound ID | Batch ID | pK <sub>a</sub> Result                                                                                                                                                           | Method    |
|----------|-------------|----------|----------------------------------------------------------------------------------------------------------------------------------------------------------------------------------|-----------|
| 210464   | WP6         | CLD001   | <b>3.52 ± 0.03 (Acid*)</b><br><b>3.62 ± 0.01 (Acid*)</b><br><b>4.16 ± 0.01 (Acid*)</b><br><b>4.41 ± 0.03 (Acid*)</b><br><b>4.80 ± 0.07 (Acid*)</b><br><b>5.66 ± 0.01 (Acid*)</b> | pH-metric |

\* The type of ionisable groups are based on our observations.



## Introduction

The experiments were designed to determine the pK<sub>a</sub> values of the submitted compounds.

## Experimental Procedure

Table 2 – Experimental Conditions

| Compound ID | Method    | Assay ID                                         | pH Range   | Media             | Temperature   | Ionic Strength Background |
|-------------|-----------|--------------------------------------------------|------------|-------------------|---------------|---------------------------|
| WP6         | pH-metric | 21H-27007                                        | 2.0 – 12.0 | MeCN/<br>water    | 25.0 ± 0.2 °C | 0.15M KCl                 |
|             | pH-metric | 21I-15005                                        | 2.0 – 12.0 | Dioxane/<br>water | 25.0 ± 0.2 °C | 0.15M KCl                 |
|             | pH-metric | 21I-09004<br>21I-17004                           | 2.0 – 12.0 | THF/water         | 25.0 ± 0.2 °C | 0.15M KCl                 |
|             | pH-metric | 21I-24004<br>21I-24007<br>21I-24014<br>21I-24017 | 2.0 – 12.0 | THF/water         | 25.0 ± 0.2 °C | 0 M                       |

Further experimental information can be found under “General Platinum Standard pK<sub>a</sub> Procedure”.

## Platinum Standard pK<sub>a</sub>: Results and Discussions

The Platinum Standard pK<sub>a</sub> assays for the submitted compound(s) were performed using the UV-metric (spectrometric) and pH-metric (potentiometric) techniques.

### Study Compound: WP6

#### Sample Preparation:

##### *pH-metric:*

The sample was prepared for the assay by weighing sample powder into a 5 mL glass assay vial. For this assay 1.11 – 2.53 mg of the sample was used.

#### Measurement:

##### *pH-metric:*

The sample was titrated potentiometrically between pH 2.0 and 12.0 in a triple titration under several co-solvent experimental conditions, due to the low solubility of the sample (especially at low pH). The pK<sub>a</sub>s were finally determined under tetrahydrofuran-water co-solvent conditions at zero ionic strength.

*Acetonitrile/water (ionic strength 0.15M KCl):*

A triple titration was carried out under acetonitrile-water co-solvent conditions from pH 12.0 – 2.0 at concentrations of 1.0 – 0.8 mM (the acetonitrile mixing ratio varied from 42.4 to 35.2 % w/w). Precipitation of the sample from solution was observed in all the titrations preventing the accurate determination of any sample pK<sub>a</sub>s using the potentiometric technique.

*Dioxane/water (ionic strength 0.15M KCl):*

A triple titration was carried out under dioxane-water co-solvent conditions from pH 12.0 – 2.0 at concentrations of 0.9 – 0.6 mM (the dioxane mixing ratio varied from 60.2 to 41.2 % w/w). Precipitation of the sample from solution was observed in all the titrations preventing the accurate determination of any sample pK<sub>a</sub>s using the potentiometric technique.

*Tetrahydrofuran /water (ionic strength 0.15M KCl):*

Two triple titrations were carried out under tetrahydrofuran-water co-solvent conditions from pH 12.0 – 2.0 at concentrations of 1.8 – 0.5 mM (the tetrahydrofuran mixing ratio varied from 56.4 to 26.1 % w/w). Precipitation of the sample from solution was observed below pH 4.8 at the highest sample concentration (1.8 mM). No precipitation was observed below concentrations of 0.8 mM, however data points were also observed to be inconsistent. Therefore, four further triple titrations were performed with zero ionic strength, due to the lower solubility of the sample in a high background electrolyte.

*Tetrahydrofuran-water (ionic strength 0 M):*

A triple titration was carried out under tetrahydrofuran-water co-solvent conditions from pH 2.0 – 12.0 at concentrations of 1.1 – 0.7 mM (the tetrahydrofuran mixing ratio varied from 51.3 to 32.0 % w/w). No precipitation of the sample from solution was observed and six pK<sub>a</sub>s, with aqueous values of 3.52 ± 0.03, 3.62 ± 0.01, 4.16 ± 0.01, 4.41 ± 0.03, 4.80 ± 0.07 and 5.66 ± 0.01 were determined from the potentiometric data collected, by Yasuda-Shedlovsky extrapolation of the individual results obtained.

Please note that the pK<sub>a</sub> values obtained should be treated with caution. This is due to the close proximity of the pK<sub>a</sub>s as well as the poor solubility observed with the compound.

**Table 3 – Assay Audit Trail**

| Compound ID | Date                                               | Instrument ID (Electrode ID) | Assay Files                                                                             | Audit Trail                                                            |
|-------------|----------------------------------------------------|------------------------------|-----------------------------------------------------------------------------------------|------------------------------------------------------------------------|
| WP6         | 27 <sup>th</sup> August 2021                       | SiriusT311054 (PBM0412)      | 21H-27007                                                                               | ..\AS_Customer Samples\ University of Maryland\September\P210127 \Data |
|             | 09 <sup>th</sup> – 24 <sup>th</sup> September 2021 | SiriusT310026 (PBM0272)      | 21I-09004<br>21I-15005<br>21I-17004<br>21I-24004<br>21I-24007<br>21I-24014<br>21I-24017 |                                                                        |

## Instrument Calibration

---

Details of the instrument calibration files are included in the individual results printouts.

## Quality Control Checks

---

Table 4 – Instrument Quality Control Checks Audit Trail

| Assay                                 | QC compound | Date                        | Instrument ID               | Assay Files | Audit Trail                            |
|---------------------------------------|-------------|-----------------------------|-----------------------------|-------------|----------------------------------------|
| Fast-UV p <sub>s</sub> K <sub>a</sub> | Propranolol | 3 <sup>rd</sup> August 2021 | SiriusT311054<br>(T3E01145) | 21H-03008   | ..\Data 2021<br>\T311054\<br>August    |
| pH-metric<br>logP                     |             | 2 <sup>nd</sup> August 2021 |                             | 21H-02014   |                                        |
| Fast-UV p <sub>s</sub> K <sub>a</sub> | Propranolol | 1 <sup>st</sup> September   | SiriusT310026<br>(PBM0272)  | 21I-01008   | ..\Data 2021<br>\T310026\<br>September |
| pH-metric<br>logP                     |             |                             |                             | 21I-01009   |                                        |

## Results Printouts

---

Individual results printouts are displayed at the end of the report.

## General pK<sub>a</sub> Platinum Standard Procedure

---

### Apparatus

An automated titrator system with an incorporated UV-Vis spectrometer<sup>1</sup> (SiriusT3™, Pion Inc.) was used to acquire the spectrometric and/or potentiometric data. The optical system consisted of a photodiode array detector with a deuterium lamp and a fibre optic dip probe.

The titrator module consisted of a temperature controller (by Peltier device with in-situ thermocouple), pH electrode, an overhead stirrer, and motorised dispensers for the automatic delivery of assay titrants and reagents via capillaries. The instrumentation was operated using SiriusT3Control software (V2.0). Data processing and generation of the reported pK<sub>a</sub> values was carried out using SiriusT3Refine software (V2.0).

### Reagents

The titrants used were 0.5 M hydrochloric acid (product code J/4330/17, Fisher Scientific) and 0.5 M potassium hydroxide (product code J/6630C/90, Fisher Scientific), standardised using Potassium Hydrogen Phthalate (Sigma Aldrich).

ACS or HPLC grade methanol, dioxane, acetonitrile, DMSO or MDM<sup>2</sup> cosolvent may be used for pK<sub>a</sub> determination. Spectrophotometric experiments are carried out in the presence of a mid-range buffer solution (15 mM Di-potassium hydrogen orthophosphate, AR grade) or Neutral Linear Buffer™ (reference number T1404007 Pion Inc.) to prevent uncontrolled pH-drift at mid-range pH.

### Procedure – Platinum standard pK<sub>a</sub>

All experiments are carried out at a controlled temperature  $25.0 \pm 0.2$  °C. The pH range of titration assays is set between pH 2.0 to pH 12.0, the pH range is adjusted accordingly to suit sample stability and/or extremely high or low pK<sub>a</sub>s. Prior to use, 0.5 M KOH base titrant is standardised by the titration of approximately 15 mg of potassium hydrogen phthalate, in triplicate. 0.5 M HCl titrant is subsequently standardised against the base titrant. The assay media for pK<sub>a</sub> determination is kept at a constant ionic strength of 0.15 M KCl and under argon atmosphere. The pH electrode is calibrated daily using the Avdeef–Bucher four–parameter equation<sup>3</sup>.

For the determination of pK<sub>a</sub> values, both pH-metric and UV-metric methods are employed. pK<sub>a</sub> results will be reported for compounds from data acquired using the UV-metric technique where pK<sub>a</sub>s are shown to exhibit UV activity and pH-metric titrations are performed to supplement UV data. pK<sub>a</sub> values determined by the pH-metric technique will be provided where pK<sub>a</sub>s cannot be identified using the UV-metric assay. The pK<sub>a</sub> values obtained from spectrophotometric experiments agree excellently with those derived from potentiometric titrations<sup>4, 5</sup>.

When cosolvent is incorporated into the assay design, the aqueous pK<sub>a</sub> values are extrapolated from the apparent pK<sub>a</sub> values measured in the presence of cosolvents (p<sub>s</sub>K<sub>a</sub>) using Yasuda-Shedlovsky extrapolation equation<sup>6</sup>; where p<sub>s</sub>K<sub>a</sub> versus reciprocal function of the dielectric constant ( $\epsilon$ ) at different cosolvent mixtures is represented. A minimum of three ratios of water/cosolvent are titrated to determine the aqueous pK<sub>a</sub> values. The co-solvent of choice will be altered accordingly to suit sample solubility.

**The spectrometric (UV-metric) method<sup>7</sup>** uses a fibre optic dip probe, a UV light source (deuterium lamp), and a photodiode array detector to capture the absorption spectra of a sample solution over the course of a titration. The compound to be analysed must contain a chromophore(s) in close proximity to the ionisation centre(s) such that the optical properties of the sample solution vary as a function of pH.

A 10 mM DMSO stock solution is prepared and 5  $\mu$ L (unless otherwise stated) of the stock solution is pipetted into the vial for titration. Neutral linear buffer (25  $\mu$ L), or phosphate buffer 15 mM (25  $\mu$ L) and 0.15 M KCl water (1.5 mL) are dispensed into the assay vial. Acid or base is added to bring the pH to the desired starting pH. Up to three titrations can be performed in one vial, reported values are determined from a minimum of three titrations.

Over the chosen pH range, any spectral changes due to ionisation are captured by the photodiode array detector for subsequent analysis. Dedicated software applies principle component analysis to the data to determine the  $pK_a$  values of the sample and resolve the molar absorptivity spectra of each sample species.

The spectrophotometric method is ideal for sparingly soluble samples because it requires a lower sample concentration than the potentiometric method. However, the  $pK_a$  can also be determined in a mixture of cosolvent and water if necessary. In cases such as these, the aqueous  $pK_a$  is determined using the Yasuda-Shedlovsky technique<sup>6</sup>.

**The potentiometric (pH metric) method** is carried out by weighing approximately 0.5 – 1.0 mg of pure drug (i.e. FW 400 g/mol) substance into an assay vial. 0.15M KCl water is added with optional cosolvent to dissolve the compound, followed by an acid or base titrant addition to decrease or increase the pH to the desired starting pH. The solution is then titrated with acid or base to the end pH. The  $pK_a$  values are determined by analysis of the obtained titrant volume difference curves by dedicated software. Up to three titrations can be performed in one vial, reported values are determined from a minimum of three titrations. For drug substances that are sparingly soluble in water, the aqueous  $pK_a$  is determined by Yasuda-Shedlovsky extrapolation<sup>5</sup> from mixtures of water and cosolvent.

## Errors

The reported error arises from the non-linear, least squares regression analysis utilised in the dedicated refinement software. Matrix algebra is used to generate the uncertainty of each parameter of the least squares fit. The regression analysis also contains a weighting scheme that allows greater significance to be accorded to the regions of the titration curve that contain information about the ionisation of the sample. For a  $pK_a$  value obtained from extrapolation using cosolvent, additional information about the quality of the extrapolation is also contained in the reported error.

## References

- <sup>1</sup>Comer et al., *Comp. Med. Chem. II.*, 2006, 5, 357.
- <sup>2</sup>Gergely Volgyi et al., *Anal. Chim. Acta*, 2007, 583, 418.
- <sup>3</sup>Avdeef and Bucher, *Anal. Chem.*, 1978, 50, 2137.
- <sup>4</sup>Mitchell et al., *J. Pharma. Biomed. Anal.*, 1999, 20, 289.
- <sup>5</sup>Tam et al., *Talanta*, 1999, 49, 539
- <sup>6</sup>Avdeef et al., *Anal. Chem.*, 1993, 65, 42.
- <sup>7</sup>Allen et al., *J. Pharm. Biomed. Anal.*, 1998, 17, 699

Sample name: **WP6 THF\_I zero**  
 Assay name: **pH-metric psKa**  
 Assay ID: **21I-24004**  
 Quality: **Good**  
 Filename: **I:\Analytical Services Lab\Data 2021\AS\_Customer Samples\University of Maryland\September\P210127\Data\21I-24004\_WP6\_I zero\_pH-metric psKa\_THF\_6pKas.t3r**

Experiment start time: **24/09/2021 12:01:40**  
 Analyst: **RR**  
 Instrument ID: **T310026**

**Yasuda-Shedlovsky result**

| Extrapolation type | pKa 0% | SD    | Intercept | Slope   | R <sup>2</sup> | Ionic strength | Temperature |
|--------------------|--------|-------|-----------|---------|----------------|----------------|-------------|
| Yasuda-Shedlovsky  | 3.62   | ±0.01 | 4.89      | 37.4791 | 0.9992         | 0.178 M        | 25.0°C      |
| Yasuda-Shedlovsky  | 3.52   | ±0.03 | 4.13      | 89.0581 | 0.9986         | 0.178 M        | 25.0°C      |
| Yasuda-Shedlovsky  | 4.16   | ±0.00 | 5.37      | 41.8154 | 0.9999         | 0.178 M        | 25.0°C      |
| Yasuda-Shedlovsky  | 4.41   | ±0.03 | 5.47      | 53.4146 | 0.9970         | 0.178 M        | 25.0°C      |
| Yasuda-Shedlovsky  | 4.80   | ±0.07 | 6.24      | 24.3499 | 0.9159         | 0.178 M        | 25.0°C      |
| Yasuda-Shedlovsky  | 5.66   | ±0.01 | 7.07      | 26.3571 | 0.9986         | 0.178 M        | 25.0°C      |

**Component assay results**

| Titration                  | THF weight% | Direction | Result type | Dielectric constant | [H2O]  | Ionic strength | Temperature | psKa 1 | psKa 2 | psKa 3 | psKa 4 | psKa 5 | psKa 6 |
|----------------------------|-------------|-----------|-------------|---------------------|--------|----------------|-------------|--------|--------|--------|--------|--------|--------|
| 21I-24004 Points 89 to 133 | 31.96 %     | Up        | pH-metric   | 55.5                | 36.1 M | 0.182 M        | 25.0°C      | ✓ 4.01 | ✓ 4.17 | ✓ 4.57 | ✓ 4.89 | ✓ 5.14 | ✓ 5.99 |
| 21I-24004 Points 46 to 88  | 41.69 %     | Up        | pH-metric   | 47.4                | 30.5 M | 0.179 M        | 25.0°C      | ✓ 4.19 | ✓ 4.54 | ✓ 4.77 | ✓ 5.11 | ✓ 5.23 | ✓ 6.14 |
| 21I-24004 Points 3 to 45   | 51.32 %     | Up        | pH-metric   | 39.3                | 25.2 M | 0.172 M        | 25.0°C      | ✓ 4.44 | ✓ 4.99 | ✓ 5.03 | ✓ 5.44 | ✓ 5.47 | ✓ 6.34 |

**Graphs**

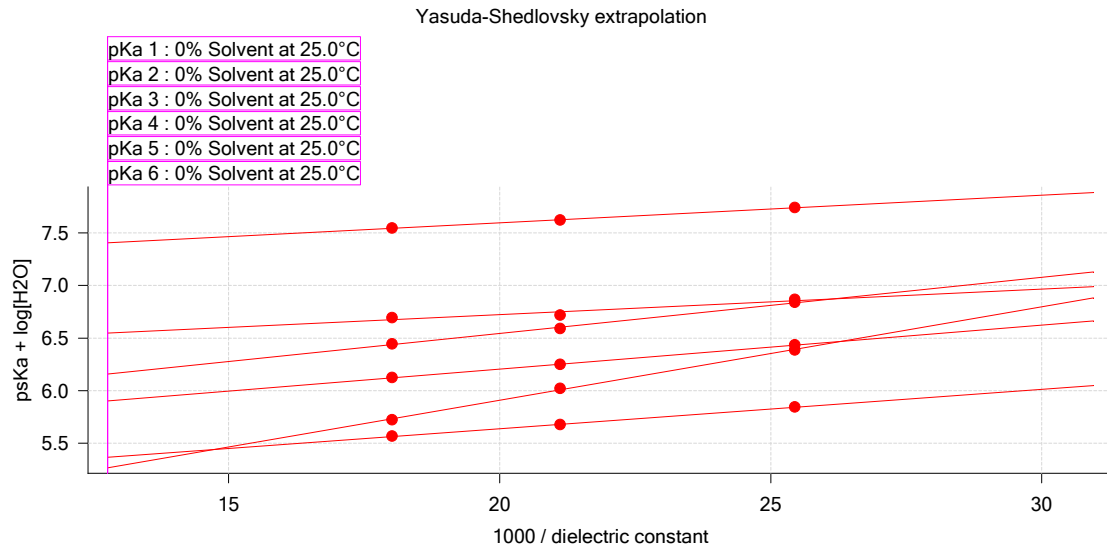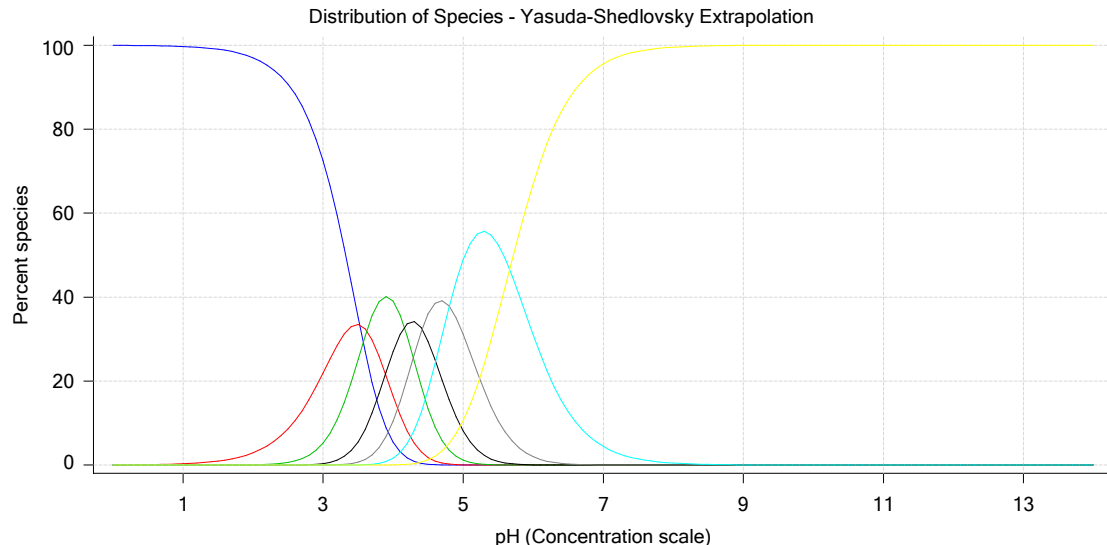

Sample name: **WP6 THF\_I zero**  
 Assay name: **pH-metric psKa**  
 Assay ID: **21I-24004**  
 Quality: **Good**  
 Filename: **I:\Analytical Services Lab\Data 2021\AS\_Customer Samples\University of Maryland\September\P210127\Data\21I-24004\_WP6\_I zero\_pH-metric psKa\_THF\_6pKas.t3r**

Experiment start time: **24/09/2021 12:01:40**  
 Analyst: **RR**  
 Instrument ID: **T310026**

**Calibration Settings**

| Setting                   | Value  | Date/Time changed   | Imported from                                                                                                                                          |
|---------------------------|--------|---------------------|--------------------------------------------------------------------------------------------------------------------------------------------------------|
| Four-Plus alpha           | 0.369  | 25/09/2021 14:51:03 | I:\Analytical Services Lab\Data 2021\AS_Customer Samples\University of Maryland\September\P210127\Data\THF-37\21I-24021_Blank standardisation- THF.t3r |
| Four-Plus S               | 0.9969 | 25/09/2021 14:51:03 | I:\Analytical Services Lab\Data 2021\AS_Customer Samples\University of Maryland\September\P210127\Data\THF-37\21I-24021_Blank standardisation- THF.t3r |
| Four-Plus jH              | -0.0   | 25/09/2021 14:51:04 | I:\Analytical Services Lab\Data 2021\AS_Customer Samples\University of Maryland\September\P210127\Data\THF-37\21I-24021_Blank standardisation- THF.t3r |
| Four-Plus jOH             | -78.0  | 25/09/2021 14:51:04 | I:\Analytical Services Lab\Data 2021\AS_Customer Samples\University of Maryland\September\P210127\Data\THF-37\21I-24021_Blank standardisation- THF.t3r |
| Base concentration factor | 1.017  | 24/09/2021 12:01:40 | I:\Analytical Services Lab\Data 2021\T310026\September\September_KHP Multiset Pass.t3r                                                                 |
| Acid concentration factor | 1.006  | 24/09/2021 12:01:40 | I:\Analytical Services Lab\Data 2021\T310026\September\21I-24003_Blank standardisation.t3r                                                             |
